# Supplementary material for: Menin Links the Stress Response to Genome Stability in Drosophila melanogaster
Source: PLoS One. 2010 Nov 18;5(11):e14049. doi: 10.1371/journal.pone.0014049 (PMC2987805; doi:10.1371/journal.pone.0014049)
Supplement: Dataset S1 — Differentially Expressed Genes in Response to Heat Shock Treatments - Role of Mnn1 gene function. Expression values for samples and heat shock treatments described in Fig. 6 are provided. For each treatment and genotype, the ratio of the treated sample vs. the untreated sample for a given gene is shown as a fold change with down-regulated genes having a negative value. (0.58 MB XLS) [file pone.0014049.s003.xls]

## Sheet: order
								Supporting Information Dataset S1; Differentially expressed genes in response to heat shock treatments - Role of Mnn1 gene function
								Heat shock duration (min)	10					60				60
								Recovery (hrs)	-					-				3
									Oregon-R	nos-GAL4	Mnn1e30	UAS-Mnn1-RNAi	UAS-Mnn1	nos-GAL4	Mnn1e30	UAS-Mnn1-RNAi	UAS-Mnn1	nos-GAL4	Mnn1e30	UAS-Mnn1	CGID	Full Name	Short Name	Aliases	Locuslink	Chomosome	Cytoband	Go Terms
								CG4336	0.09	0.27	0.3	-0.24	0.66	0.21	-0.23	-0.27	0.22	-0.15	-0.25	-0.33	CG4336	roughex	rux	||CG4336||rux||Rux||	31535	X	5D2	cellular component|nucleus|IEA|GO:0005634|Proteome|11002423//biological process|regulation of cell cycle|IEA|GO:0000074|Proteome|11002423//biological process|mitotic cell cycle|IMP|GO:0000278|Proteome|11002423//biological process|regulation of mitosis|IMP
								CG1311	-0.66	-0.13	0	0.24	0.27	0.4	0.7	0.11	-0.06	-0.15	-0.27	0.01	CG1311	CG1311	CG1311	||CG1311||	38523	NA	64A12	molecular function|transporter activity|IEA|GO:0005215|Proteome|11002423//biological process|transport|IEA|GO:0006810|Proteome|11002423//
								CG4532	-0.84	0.03	-0.42	0.07	0.95	0.06	0.64	0.03	-0.19	-0.3	-0.05	-0.18	CG4532	pod1	pod1	||POD-1/coronin||Dpod1||CG4532||BEST:LD37601||BcDNA:LD08951||pod1||	31620	X	6D2-6D3	molecular function|structural constituent of cytoskeleton|IEA|GO:0005200|Proteome|11002423//molecular function|actin binding|NAS|GO:0003779|Proteome|11002423//
								CG10334	-0.78	-0.41	-0.23	-0.36	0.95	-1.01	0.67	0.35	-0.68	-0.24	-0.42	-1.42	CG10334	spitz	spi	||l(2)37Fa||l(2)s3547||CG10334||anon-WO0118547.158||CT29014||Spitz||EP(2)2378||Spi||spi||l(2)01068||	35253	2L	37F2	cellular component|endoplasmic reticulum|TAS|GO:0005783|Proteome|11002423//cellular component|Golgi apparatus|IDA|GO:0005794|Proteome|11002423//biological process|oenocyte development|IMP|GO:0007438|Proteome|11002423//biological process|peripheral nervous
								CG7554	-0.87	-0.19	-0.11	-0.34	0.42	-0.78	0.89	0.17	-0.99	0.19	-0.43	-0.86	CG7554	comm2	comm2	||comm2||CG7554||	39716	3L	71F1	biological process|biological_process unknown|ND|GO:0000004|Proteome|11002423//molecular function|molecular_function unknown|ND|GO:0005554|Proteome|11002423//cellular component|cellular_component unknown|ND|GO:0008372|Proteome|11002423//
								CG5442	-0.64	-0.21	-0.84	-0.49	0.83	-0.15	0.88	0.34	-0.3	-0.17	-0.39	-0.26	CG5442	SC35	SC35	||cg5442||CG5442||dSC35||CG5542||SC35||	53444	2L	330000	cellular component|omega speckle|IDA|GO:0035062|Proteome|11002423//cellular component|nucleus|IEA|GO:0005634|Proteome|11002423//cellular component|chromatin|NAS|GO:0000785|Proteome|11002423//cellular component|nucleus|IEA|GO:0005634|Proteome|11002423//cel
								CG1448	-1.2	-0.67	-0.83	-0.73	0.96	-0.68	0.66	0.2	-0.47	-0.56	-0.68	-1.16	CG1448	innexin 3	inx3	||Dm-inx3||inx3||CG1448||Ix3||inx-3||	44266	3R	98E6-98F1	biological process|signal transduction|IEA|GO:0007165|Proteome|11002423//cellular component|gap junction|TAS|GO:0005921|Proteome|11002423//cellular component|gap junction|TAS|GO:0005921|Proteome|11002423//cellular component|gap junction|TAS|GO:0005921|Pro
								CG2125	-1.3	-0.47	-1.19	-0.9	0.68	-0.38	0.69	0.18	-0.69	-0.74	-0.64	-1.4	CG2125	cubitus interruptus	ci	||Cell||ci155||cubitus-interruptus-dominant||cubitus-interruptus-Dominant||Ce||l(4)102ABc||CI||Ci||ci||CID||CiD||ciD||CG2125||Cubitus interruptus||l(4)13||l(4)17||ci<up>D</up>||Ci<up>D</up>||ci-D||	43767	4	102A1-102A3	cellular component|nucleus|IEA|GO:0005634|Proteome|11002423//cellular component|cytoplasm|IEA|GO:0005737|Proteome|11002423//cellular component|membrane|IEA|GO:0016020|Proteome|11002423//molecular function|zinc ion binding|IEA|GO:0008270|Proteome|11002423/
								CG2198	-1	0.02	-0.67	-0.44	0.95	-0.45	1.54	0.4	-0.98	-0.9	-0.71	-1.25	CG2198	Amalgam	Ama	||CT7244||amalgam||BG:DS00276.6||CG2198||M109||ama||Ama||AMA||	40831	3R	84A5	cellular component|plasma membrane|ISS|GO:0005886|Proteome|11002423//biological process|signal transduction|IEA|GO:0007165|Proteome|11002423//biological process|cell-cell adhesion|IEA|GO:0016337|Proteome|11002423//cellular component|plasma membrane|ISS|GO
								CG6234	-0.83	-0.05	-0.31	-0.43	0.5	-0.05	1.24	-0.01	-0.38	-0.4	-0.86	-0.72	CG6234	CG6234	CG6234	NA	41558	3R	87C3	NA
								CG8361	-0.23	0.06	-0.06	-0.16	0.44	-0.72	1.27	0.16	-0.31	-0.25	-0.42	-0.61	CG8361	E(spl) region transcript m7	HLHm7	||HLHm7||m7||M7||ESPL||E(spl)-m7||E(spl)-M7||E(spl) m7||E(SPL)m7||E(spl)M7||E(spl)m7||CG8361||HLH-m7||	43160	3R	96F10	biological process|ectoderm development|IEA|GO:0007398|Proteome|11002423//biological process|neurogenesis|IEP|GO:0007399|Proteome|11002423//biological process|cell proliferation|IEA|GO:0008283|Proteome|11002423//molecular function|specific RNA polymerase
								CG4886	-0.41	-0.11	-0.32	0.16	0.25	0.28	0.91	0.14	0.2	0.24	-0.25	-0.12	CG4886	cyclophilin-33	cyp33	||cyp33||Cyp33||CG4886||Dcyp33||	36984	2R	54C3	biological process|protein targeting|IEA|GO:0006605|Proteome|11002423//biological process|defense response|IEA|GO:0006952|Proteome|11002423//molecular function|mRNA binding|ISS|GO:0003729|Proteome|11002423//molecular function|mRNA binding|ISS|GO:0003729|P
								CG3839	-0.43	-0.03	-0.31	-0.08	0.4	-0.11	1.25	0.35	0.48	-0.24	-0.89	-0.29	CG3839	NA	NA	||CG3839||lsc||l(1)1Ba||l(1)sc||T3||AS-T3||L'Sc||L'sc||l'sc||AS-C T3||ASC-T3||sc/T3||l-sc||Lethal of Scute||ascT3||EG:198A6.2||	30983	X	1A8	molecular function|specific RNA polymerase II transcription factor activity|ISS|GO:0003704|Proteome|11002423//cellular component|nucleus|IEA|GO:0005634|Proteome|11002423//biological process|regulation of transcription from Pol II promoter|IEA|GO:0006357|P
								CG8337	-0.45	-0.25	-0.23	0.11	0.64	-0.53	1.41	0.2	0.15	0.47	-0.66	-0.36	CG8337	NA	NA	NA	192347	NA	NA	NA
								CG3048	-0.63	-0.08	-0.22	-0.28	0.5	-0.07	1.25	0.14	-0.13	0.26	-0.79	-0.48	CG3048	TNF-receptor-associated factor 1	Traf1	||dTRAF||DTRAF||dtraf1||dTraf1||dTRAF1||DTRAF1||CG3048||TRAF||Traf1||TRAF1||	33638	NA	240000	molecular function|receptor binding|IEA|GO:0005102|Proteome|11002423//biological process|induction of apoptosis|TAS|GO:0006917|Proteome|11002423//biological process|I-kappaB kinase/NF-kappaB cascade|IEA|GO:0007249|Proteome|11002423//biological process|JNK
								CG5481	-0.7	-0.43	-0.17	-0.18	0.65	0.02	1.22	0.25	-0.37	0.14	-0.37	-0.31	CG5481	leak	lea	||robo-2||Robo-2||lea||anon-EST:Liang-1.75||robo2||Robo2||Robo 2||roundabout 2||Roundabout 2||dRobo-2||D-robo2||D-Robo2||CT17326||CG5481||clone 1.75||CG14347||CG14348||CG5574||	44522	2L	22A1	biological process|defense response|IEA|GO:0006952|Proteome|11002423//biological process|signal transduction|IEA|GO:0007165|Proteome|11002423//biological process|ectoderm development|IEA|GO:0007398|Proteome|11002423//biological process|cell-cell adhesion|
								CG17746	0.39	-0.38	0.05	-0.3	0.29	0.23	-0.49	0.13	0.77	-0.41	-0.46	0.02	CG17746	CG17746	CG17746	||CG17746||PP2C||	38400	3L	63C1	cellular component|protein serine/threonine phosphatase complex|IEA|GO:0008287|Proteome|11002423//molecular function|protein serine/threonine phosphatase activity|ISS|GO:0004722|Proteome|11002423//biological process|protein amino acid dephosphorylation|NA
								CG1822	0.04	-0.34	-0.27	-0.24	0.39	0.35	-0.28	0.3	0.91	-0.41	-0.16	0.3	CG1822	bifocal	bif	||bif||CG1822||	32119	X	10D4-10D5	molecular function|actin binding|NAS|GO:0003779|Proteome|11002423//cellular component|cytoplasm|IEA|GO:0005737|Proteome|11002423//molecular function|microtubule binding|ISS|GO:0008017|Proteome|11002423//biological process|female meiosis chromosome segrega
								CG1372	-0.05	-0.41	-0.36	-0.07	-0.74	1.45	0.19	0.2	1.77	-0.73	-0.75	1.23	CG1372	yolkless	yl	||fs(1)yl||CT3114||LR13||fs(1)K184||fs(1)L193||yl||fs(1)L186||fs(1)L196||DmYPR||YP receptor||fs(1)M25||fs(1)5||fs(1)yolkless||CG1372||fs(1)148||fs(1)A148||fs(1)L211||fs(1)M205||	32367	X	12E3-12E4	molecular function|structural constituent of ribosome|IEA|GO:0003735|Proteome|11002423//molecular function|calcium ion binding|IEA|GO:0005509|Proteome|11002423//cellular component|intracellular|IEA|GO:0005622|Proteome|11002423//cellular component|ribosome
								CG8735	-0.07	0.08	0	-0.09	-0.15	0.39	-0.36	0.07	0.73	-0.43	-0.12	-0.07	CG8735	CG8735	CG8735	NA	35842	2R	44D4	NA
								CR40465	0.08	-0.21	0.01	0	-0.24	0.14	0.09	0.03	0.68	-0.72	-0.14	0.04	CR40465
								CG7154	-0.79	-0.33	-0.25	-0.12	0.83	0.49	0.66	-0.99	0.6	0.01	-0.47	0.11	CG7154	CG7154	CG7154	||CG7154||	34062	2L	28C3	molecular function|chromatin binding|IEA|GO:0003682|Proteome|11002423//molecular function|DNA binding|ISS|GO:0003677|Proteome|11002423//cellular component|nucleus|IEA|GO:0005634|Proteome|11002423//
								CG10333	-0.12	-0.34	0.21	-0.41	0.07	0.38	0.74	-0.36	0.03	0.14	-0.25	0.14	CG10333	NA	NA	||cg10333||CG10333||DmRH19||	35112	2L	36F7	molecular function|ATP binding|IEA|GO:0005524|Proteome|11002423//biological process|nuclear mRNA splicing, via spliceosome|NAS|GO:0000398|Proteome|11002423//biological process|nuclear mRNA splicing, via spliceosome|NAS|GO:0000398|Proteome|11002423//biolog
								CG3962	-0.11	-0.48	0.23	-0.06	0.12	0.82	0.63	-0.34	0.63	-0.21	-0.22	-0.02	CG3962	Keap1	Keap1	||Keap1||dKEAP1||CG3962||	42062	3R	89E11-89E12	molecular function|structural constituent of cytoskeleton|IEA|GO:0005200|Proteome|11002423//molecular function|actin binding|NAS|GO:0003779|Proteome|11002423//
								CG1515	-0.11	-0.12	-0.14	-0.23	0.63	0.13	0.05	0.14	0.05	0.33	-0.56	-0.12	CG1515	lethal (1) G0155	l(1)G0155	||l(1)G0155||CG1515||	31706	X	7C3	biological process|intracellular protein transport|IEA|GO:0006886|Proteome|11002423//molecular function|SNAP receptor activity|ISS|GO:0005484|Proteome|11002423//
								CR40459	-1.98	-1.81	-2.1	-1.07	-0.85	-0.48	0.74	1.35	1.52	-2.29	-1.47	-0.59	CR40459
								CG3647	0.07	-0.2	-0.57	0.14	0.45	0.64	0.14	0.2	0.37	0.05	-0.4	0.69	CG3647	shuttle craft	stc	||BG:DS04929.4||BcDNA:LD22726||l35Cb||BcDNA.LD22726||l(2)br33||stc||br33||l(2)SH1565||l(2)35Cb||l(2)SH2 1565||Cf4||CG3647||Chorion-factor-4||	34888	2L	35C2	cellular component|ubiquitin ligase complex|IEA|GO:0000151|Proteome|11002423//molecular function|transcription factor activity|IEA|GO:0003700|Proteome|11002423//molecular function|structural constituent of ribosome|IEA|GO:0003735|Proteome|11002423//molecu
								CG5263	0.2	-0.55	-0.82	0.1	0.81	0.8	-0.25	0.65	1.08	-0.01	-0.98	0.63	CG5263	smaug	smg	||CG5263||D69||anon-D69||smg||Smg||anonD69||	39034	3L	66F1	cellular component|cytoplasm|IEA|GO:0005737|Proteome|11002423//biological process|negative regulation of translation|NAS|GO:0016478|Proteome|11002423//molecular function|translation repressor activity|TAS|GO:0030371|Proteome|11002423//molecular function|m
								CG4317	0.1	-0.44	-0.06	-0.04	0.45	0.42	0.23	-0.11	0.59	0	-0.33	0.57	CG4317	Multiple inositol polyphosphate phosphatase 2	Mipp2	||Mipp2||CG4317||l(1)G0050||l(1)G0303||	31544	NA	5D4	molecular function|acid phosphatase activity|ISS|GO:0003993|Proteome|11002423//molecular function|inositol or phosphatidylinositol phosphatase activity|ISS|GO:0004437|Proteome|11002423//molecular function|inositol or phosphatidylinositol phosphatase activ
								CG2714	-0.55	-0.18	-0.35	0.06	0.31	0.71	0.2	0.07	0.5	-0.15	-0.07	0.2	CG2714	cramped	crm	||crm||sa||sta<up>P</up>||l(1)3Ca||l(1)3C1||swollen-antenna||zw-9||ZW-9||CG2714||l(1)zw9||zw9||swa||stubarista from P32||EG:95B7.2||sparse-arista||	31268	X	3B4-3B5	molecular function|DNA binding|ISS|GO:0003677|Proteome|11002423//cellular component|nucleus|IEA|GO:0005634|Proteome|11002423//biological process|segment specification|IMP|GO:0007379|Proteome|11002423//cellular component|nucleus|IEA|GO:0005634|Proteome|110
								CR32162	-0.51	-1.05	-0.92	-0.45	0.58	1.03	0.58	-0.38	1.01	-0.71	-1.26	0.36	CR32162
								CG6236	-0.56	-0.26	-0.2	-0.14	0.33	0.68	0.43	0.2	1.07	0.3	0.01	0.56	CG6236	CG6236	CG6236	NA	41857	3R	88F1	NA
								CG4107	-0.2	-0.45	-0.18	-0.23	0.15	0.51	0.74	0.18	0.24	-0.05	-0.45	0.26	CG4107	Pcaf	Pcaf	||dGcn5||dGCN5||Gcn5/PCAF||dmHAG401||CG4107||p/CAF||P/CAF||Pcaf||PCAF||anon-WO0172774.89||gcn5||Gcn5||GCN5||dGCN5 HAT||dPCAF||	39431	3L	69C4	cellular component|polytene chromosome|NAS|GO:0005700|Proteome|11002423//biological process|regulation of transcription from Pol II promoter|IEA|GO:0006357|Proteome|11002423//cellular component|SAGA complex|IPI|GO:0000124|Proteome|11002423//molecular func
								CG16812	-0.69	-0.81	0.01	-0.14	0.7	0.61	0.58	0.1	0.39	-0.2	-0.4	0.13	CG16812	CG16812	CG16812	NA	34722	2L	34A10	NA
								CG3496	-1.09	-0.59	-0.12	-0.55	0.38	0.86	1.04	0.07	1.14	0.1	-0.65	0.37	CG3496	virilizer	vir	||CG3496||vir||	47869	2R	59D8-59D9	cellular component|nucleus|IEA|GO:0005634|Proteome|11002423//molecular function|nucleic acid binding|IEA|GO:0003676|Proteome|11002423//molecular function|nucleic acid binding|IEA|GO:0003676|Proteome|11002423//cellular component|nucleus|IEA|GO:0005634|Prot
								CG5733	-0.97	-0.28	-0.31	-0.16	0.63	0.64	0.76	0.1	0.56	-0.06	-0.3	0.25	CG5733	CG5733	CG5733	NA	37078	2R	55B10-55B11	NA
								CG5216	-0.06	0.03	0.08	-0.21	0.77	0.36	0	0.1	0.69	-0.49	-0.6	0.54	CG5216	Sir2	Sir2	||Sir2||SIR2||D.mel1||dsir2||dSir2||dSIR2||dmSRT406||BEST:LD38188||CG5216||Sir2L||l(2)05326||	34708	2L	34A7	molecular function|histone deacetylase activity|IDA|GO:0004407|Proteome|11002423//cellular component|nucleus|IEA|GO:0005634|Proteome|11002423//cellular component|cytoplasm|IEA|GO:0005737|Proteome|11002423//biological process|histone deacetylation|IDA|GO:0
								CG4266	0	-0.22	0.2	-0.35	1.01	0.38	0.32	0.34	0.97	-0.02	-0.62	0.73	CG4266	CG4266	CG4266	||cg4266||CG4266||	37411	2R	57C6-57C7	biological process|nuclear mRNA splicing, via spliceosome|NAS|GO:0000398|Proteome|11002423//molecular function|mRNA binding|ISS|GO:0003729|Proteome|11002423//
								CG9327	0.02	-0.22	0.08	-0.41	0.57	0.4	0.06	0.43	0.57	0.13	-0.58	0.59	CG9327	Proteasome 29kD subunit	Pros29	||PROS-29||20s proteasome||20S proteasome||&agr;3_dm||Proteasome subunit &agr;-type 4||pros29||Pros29||CG9327||	37378	2R	57B7	molecular function|endopeptidase activity|IEA|GO:0004175|Proteome|11002423//cellular component|proteasome core complex (sensu Eukarya)|IEA|GO:0005839|Proteome|11002423//cellular component|proteasome complex (sensu Eukarya)|NAS|GO:0000502|Proteome|11002423
								CG9191	-0.68	-0.4	-0.21	-0.02	0.81	0.7	0.89	-0.15	0.74	-0.58	-0.65	0.53	CG9191	Kinesin-like protein at 61F	Klp61F	||Krp130||KRP130||Klp61F/KRP130||kinesin-like protein||KRP<down>(130)</down>||DmKlp61F||DmKLP61F||urchin||urc||l(3)07012||KLP61||Kinesin-related protein-130kD||6345||DmKRP130||KLP61F||Klp61F||klp61f||KRP<down>130</down>||urcn||KLP2||Klp2||KIP8||CG9191||	38135	3L	61F4	molecular function|motor activity|ISS|GO:0003774|Proteome|11002423//cellular component|cytoplasm|IEA|GO:0005737|Proteome|11002423//cellular component|kinesin complex|ISS|GO:0005871|Proteome|11002423//cellular component|microtubule associated complex|IEA|G
								CG6813	-0.26	-0.1	0.16	0.02	0.35	0.16	0.72	0.01	0.72	-0.47	-0.3	0	CG6813	CG6813	CG6813	||CG31372||CG6813||	41396	NA	860000000000000	molecular function|nucleic acid binding|IEA|GO:0003676|Proteome|11002423//cellular component|nucleus|IEA|GO:0005634|Proteome|11002423//molecular function|zinc ion binding|IEA|GO:0008270|Proteome|11002423//
								CG8590	-0.72	-0.08	-0.03	-0.14	0.57	0.26	1.18	0.21	0.83	-0.74	-0.72	0.44	CG8590	Kinesin-like protein at 3A	Klp3A	||CG8590||EG:BACR25B3.9||mei-352||BcDNA:LD21815||meiotic 352||female sterile(1)M4||KLP-3A||DmKLP3A||DmKlp3A||3A7Kin||KIF4A||Kinesin-Like-Protein-at-3A||KLP3A||Klp3A||Klp3a||klp3A||fs(1)M4||	31240	X	3A6	cellular component|nucleus|IEA|GO:0005634|Proteome|11002423//cellular component|nucleus|IEA|GO:0005634|Proteome|11002423//cellular component|cytoplasm|IEA|GO:0005737|Proteome|11002423//cellular component|aster|IDA|GO:0005818|Proteome|11002423//cellular co
								CG13329	-0.78	-0.35	-0.17	-0.27	0.12	0.33	0.64	-0.25	1.14	-0.65	-0.35	0.25	CG13329	centromere identifier	cid	||cid||Cid||CID||cenH3||CID/CENP-A||CENP-A/Cid||CENP-A/CID||CENP-A||BcDNA:RE21270||cenpA||CG13329||	36495	2R	50A11	cellular component|inner kinetochore of condensed nuclear chromosome|IDA|GO:0000941|Proteome|11002423//cellular component|nucleosome|IEA|GO:0000786|Proteome|11002423//biological process|nucleosome assembly|IEA|GO:0006334|Proteome|11002423//biological proc
								CG6874	-0.35	-0.16	0.11	-0.27	0.28	0.38	0.56	-0.1	1.25	-0.86	-0.98	0.19	CG6874	lethal (3) neo26	l(3)neo26	NA	40047	3L	750	NA
								CG15479	-0.17	-0.1	-0.13	0.06	0.59	1.05	0.34	0.3	0.38	-0.28	-0.67	0.2	CG15479	CG15479	CG15479	NA	34727	2L	34A11	NA
								CG31152	-0.53	-0.16	0.01	0.25	0.62	0.88	0.51	0.12	1.29	-0.56	-0.12	0.04	CG31152	CG31152	CG31152	NA	326122	NA	94C4	NA
								CG14033	-0.56	-0.33	-0.41	-0.22	1.01	0.93	0.54	0.06	0.92	-0.64	-0.02	-0.01	CG14033	CG14033	CG14033	NA	249152	NA	25D2	NA
								CG15266	-0.38	-0.12	0.04	-0.3	0.66	0.64	0.47	0.03	0.73	-0.68	-0.02	0.13	CG15266	CG15266	CG15266	NA	34893	NA	35C5	NA
								CG3363	-0.63	-0.25	0.12	-0.2	0.65	0.75	0.35	0.37	0.63	-1.06	-0.52	0.32	CG3363	CG3363	CG3363	NA	37874	2R	60C2	NA
								CG6818	-0.07	-0.11	-0.09	0.31	0.03	0.86	0.24	0.37	1.01	0.14	-0.59	0.71	CG6818	Misexpression suppressor of ras 6	MESR6	||CG6818||MESR6||	40083	3L	75F7	biological process|biological_process unknown|ND|GO:0000004|Proteome|11002423//molecular function|molecular_function unknown|ND|GO:0005554|Proteome|11002423//cellular component|cellular_component unknown|ND|GO:0008372|Proteome|11002423//
								CG12896	-0.5	-0.25	-0.07	-0.11	0.61	1.53	0.21	0.21	1.78	0.29	-0.31	0.78	CG12896	CG12896	CG12896	||AOP2-related||BEST:LD11278||CG12896||	36101	2R	47A7	molecular function|peroxidase activity|ISS|GO:0004601|Proteome|11002423//biological process|oxygen and reactive oxygen species metabolism|NAS|GO:0006800|Proteome|11002423//biological process|defense response|IEA|GO:0006952|Proteome|11002423//biological pr
								CG17958	-0.33	-0.05	0.05	-0.32	0.7	1.44	0.41	0.04	1.48	0.18	-0.51	0.68	CG17958	NA	NA	NA	192347	NA	NA	NA
								CG9231	0.18	-0.15	-0.31	-0.43	0.42	0.7	0.02	0.02	0.79	-0.07	-0.36	0.37	CG9231	CG9231	CG9231	NA	40130	3L	76B8	NA
								CG12086	-0.27	-0.38	-0.26	-0.35	0.45	0.77	0.24	0.32	1.08	-0.08	-0.27	0.57	CG12086	cueball	cue	||CT5570||CG12086||ms(3)02509||cue||	47265	NA	62A6-62A7	cellular component|membrane|IEA|GO:0016020|Proteome|11002423//biological process|primary spermatocyte growth|IMP|GO:0007285|Proteome|11002423//molecular function|low-density lipoprotein receptor activity|ISS|GO:0005041|Proteome|11002423//
								CG4404	0.08	-0.27	-0.26	-0.38	0.5	1.21	0.25	0.33	1.34	-0.1	-0.54	0.58	CG4404	CG4404	CG4404	||CG4404||	32241	X	11D1	molecular function|DNA binding|ISS|GO:0003677|Proteome|11002423//
								CG14527	-0.12	-0.17	0.19	0	0.24	0.72	0.02	-0.21	1.13	-0.02	-0.21	0.36	CG14527	CG14527	CG14527	||CG14527||	43412	3R	98F1	molecular function|neprilysin activity|IEA|GO:0004245|Proteome|11002423//biological process|proteolysis and peptidolysis|NAS|GO:0006508|Proteome|11002423//biological process|proteolysis and peptidolysis|NAS|GO:0006508|Proteome|11002423//molecular function
								CG31360	-0.05	0.03	0.08	0.05	0.05	0.71	0	0	0.78	0.09	-0.2	0.42	CG31360	CG31360	CG31360	NA	318698	3R	90C1	NA
								CG5199	-0.43	-0.08	0.02	-0.14	0.07	0.95	0.95	0.22	0.63	-0.47	-0.73	0.59	CG5199	CG5199	CG5199	NA	40265	3L	77C3	NA
								CG6632	-0.18	0.15	0.03	-0.1	0.15	0.62	0.69	0.14	0.64	-0.02	-0.53	0.44	CG6632	Ing3	Ing3	||Ing3||CG6632||dIng3||	32853	X	17C7	biological process|regulation of cell cycle|IEA|GO:0000074|Proteome|11002423//molecular function|DNA binding|ISS|GO:0003677|Proteome|11002423//molecular function|cysteine-type endopeptidase activity|IEA|GO:0004197|Proteome|11002423//biological process|reg
								CG4575	-0.26	0.06	-0.32	0.01	0.03	1.28	0.57	0.26	1.04	-0.43	-0.58	0.39	CG4575	CG4575	CG4575	||CG4575||	31637	NA	6000	biological process|regulation of transcription, DNA-dependent|ISS|GO:0006355|Proteome|11002423//biological process|segment specification|IMP|GO:0007379|Proteome|11002423//molecular function|transcription factor activity|IEA|GO:0003700|Proteome|11002423//c
								CG33088	-0.53	-0.09	-0.5	-0.02	0.13	0.9	0.42	-0.04	1.36	-0.6	-0.21	0.55	CG33088	NA	NA	NA	192347	NA	NA	NA
								CG5380	-0.26	-0.17	-0.27	-0.1	0.08	0.74	0.56	-0.09	0.75	-0.14	-0.14	0.17	CG5380	CG5380	CG5380	||CG5380||	42619	3R	94A8-94A9	molecular function|nucleic acid binding|IEA|GO:0003676|Proteome|11002423//molecular function|DNA binding|ISS|GO:0003677|Proteome|11002423//biological process|tRNA metabolism|IEA|GO:0006399|Proteome|11002423//biological process|rRNA metabolism|IEA|GO:00160
								CG3771	-0.34	0.1	-0.25	-0.13	0.05	0.43	0.27	0.08	0.65	-0.03	-0.41	-0.06	CG3771	a6	a6	||CG3771||EG:9D2.3||a6||	31127	X	2B7	biological process|embryonic development (sensu Insecta)|IMP|GO:0001700|Proteome|11002423//molecular function|odorant binding|IEA|GO:0005549|Proteome|11002423//cellular component|cellular_component unknown|ND|GO:0008372|Proteome|11002423//
								CG9437	-0.62	0.48	-0.23	-0.28	0.31	0.77	0.6	0.18	0.96	-0.31	-0.51	0.35	CG9437	CG9437	CG9437	||CG9437||	37412	2R	57C7	molecular function|DNA binding|ISS|GO:0003677|Proteome|11002423//
								CG18446	-0.66	0.18	-0.32	0.26	1.11	0.9	0.7	0.11	1.11	-0.44	-0.78	0.35	CG18446	CG18446	CG18446	||CG18446||	36023	2R	46C1	molecular function|nucleic acid binding|IEA|GO:0003676|Proteome|11002423//cellular component|nucleus|IEA|GO:0005634|Proteome|11002423//molecular function|zinc ion binding|IEA|GO:0008270|Proteome|11002423//
								CG1677	-0.11	-0.25	-0.34	-0.11	1.2	0.79	0.48	0.67	0.98	-0.04	-0.45	0.65	CG1677	CG1677	CG1677	||CG1677||	31662	NA	7A8-7B2	molecular function|nucleic acid binding|IEA|GO:0003676|Proteome|11002423//cellular component|nucleus|IEA|GO:0005634|Proteome|11002423//
								CG10149	-0.57	-0.38	-0.04	-0.03	0.9	0.71	0.34	0.29	0.66	-0.14	-1.03	0.5	CG10149	Proteasome p44	Rpn6	||p42B||BcDNA:LD18931||CG10149||BcDNA.LD18931||Rpn6||l(2)k00103||Pros44.5||	36638	2R	51C1	molecular function|endopeptidase activity|IEA|GO:0004175|Proteome|11002423//cellular component|proteasome regulatory particle (sensu Eukarya)|NAS|GO:0005838|Proteome|11002423//biological process|proteolysis and peptidolysis|NAS|GO:0006508|Proteome|1100242
								CG3941	-0.18	-0.29	-0.34	-0.06	0.61	0.76	0.69	0.03	1.04	0.33	-0.63	0.84	CG3941	pita	pita	||CG3941||pita||	37730	2R	59000	molecular function|nucleic acid binding|IEA|GO:0003676|Proteome|11002423//cellular component|nucleus|IEA|GO:0005634|Proteome|11002423//biological process|nucleobase, nucleoside, nucleotide and nucleic acid metabolism|IEA|GO:0006139|Proteome|11002423//biol
								CG1828	-0.7	-0.42	-0.38	-0.28	1.16	0.78	0.8	0.24	0.98	0.23	-0.51	0.71	CG1828	dre4	dre4	||DRE4/dSPT16||l(3)62Bg||dspt16||dSPT16||supressor of Ty element 16||CG1828||spt16||Spt16||dre4||l(3)dre4||lethal(3)62Bg||	38248	3L	62B7	molecular function|transcription cofactor activity|IEA|GO:0003712|Proteome|11002423//biological process|regulation of transcription from Pol II promoter|IEA|GO:0006357|Proteome|11002423//biological process|proteolysis and peptidolysis|NAS|GO:0006508|Prote
								CG11577	-0.41	-0.2	-0.02	0.04	0.93	0.96	0.61	0.01	0.88	0.12	-0.62	0.44	CG11577	CG11577	CG11577	NA	40084	3L	75F7	NA
								CG7704	-0.54	-0.44	-0.06	-0.02	0.7	0.75	0.36	0.09	0.61	0.24	-0.53	0.3	CG7704	TBP-associated factor 5	Taf5	||TAF<down>II</down>||dmTaf5||Taf80||TAF80||TAF<down>II</down>80/85||Taf85||Taf<down>II</down>80||TAF<down>II</down>80||TBP-associated factor 80kD||d80||dTAF<down>II</down>80||TBP associated factor 80||TFIID||TAF5||Taf5||TAFII80||dTAFii80||TBP-associated	47900	NA	47C5	cellular component|SAGA complex|IPI|GO:0000124|Proteome|11002423//cellular component|SAGA complex|IPI|GO:0000124|Proteome|11002423//cellular component|SAGA complex|IPI|GO:0000124|Proteome|11002423//cellular component|transcription factor TFIID complex|ISS
								CG7946	-0.28	-0.23	-0.13	-0.24	0.38	0.27	0.24	0.29	0.83	-0.18	-0.17	0.45	CG7946	CG7946	CG7946	NA	43576	NA	99D3	NA
								CG4193	-1.24	-1.42	-1.62	-1.72	2.3	1.71	-0.66	0.61	2.12	-1.34	-1.36	1.63	CG4193	deadhead	dhd	||dhd||CG4193||Trx-1||thioredoxin||DmTrx-1||thioredoxin-like||	31444	X	4F4	molecular function|thiol-disulfide exchange intermediate activity|ISS|GO:0030508|Proteome|11002423//molecular function|electron transporter activity|IEA|GO:0005489|Proteome|11002423//biological process|protein folding|IEA|GO:0006457|Proteome|11002423//bio
								CG4824	-0.75	-0.48	-0.5	-0.83	1.28	1.19	0.24	0.12	1.42	-0.39	-0.43	1.39	CG4824	Bicaudal C	BicC	||BicC||l(2)br34||br34||CG4824||Bicaudal-C||Bic-C||BG:DS00913.2||	34946	2L	3500	biological process|follicle cell migration (sensu Insecta)|TAS|GO:0007297|Proteome|11002423//biological process|oogenesis (sensu Insecta)|TAS|GO:0009993|Proteome|11002423//molecular function|protein binding|IEA|GO:0005515|Proteome|11002423//molecular func
								CG2913	-0.09	-0.11	-0.34	-0.29	0.32	0.92	0.1	-0.2	1.44	-0.74	-0.6	0.44	CG2913	yin	yin	||yin||CG2913||oligopeptide transporter 1||opt||EG:EG0002.1||opt1||	31340	X	3F3-3F4	molecular function|proton-dependent oligopeptide transporter activity|NAS|GO:0005427|Proteome|11002423//cellular component|integral to plasma membrane|NAS|GO:0005887|Proteome|11002423//biological process|transport|IEA|GO:0006810|Proteome|11002423//biologi
								CG7846	0.06	-0.05	-0.07	-0.47	0.42	0.69	0.48	-0.05	0.98	-0.38	-0.46	0.33	CG7846	CG7846	CG7846	||CG7846||	32769	X	1600	molecular function|ATP binding|IEA|GO:0005524|Proteome|11002423//biological process||IEA|GO:0015986|Proteome|11002423//cellular component||IEA|GO:0016469|Proteome|11002423//molecular function||IEA|GO:0046933|Proteome|11002423//molecular function||IEA|GO:0
								CG3430	-0.9	-0.65	-0.19	-0.4	0.62	0.96	0.98	0.48	0.99	-0.65	-0.9	0.46	CG3430	CG3430	CG3430	NA	33976	NA	27C7	NA
								CG5585	-0.69	-0.28	-0.06	-0.3	0.37	0.74	0.5	0.5	0.76	-0.49	-0.57	-0.01	CG5585	CG5585	CG5585	NA	40239	3L	77B4	NA
								CG11839	-0.34	-0.37	-0.21	-0.39	0.14	0.65	0.55	0.27	0.92	-0.64	-0.77	0.19	CG11839	CG11839	CG11839	NA	43006	3R	96B20	NA
								CG12117	-0.49	-0.08	-0.41	-0.36	0.25	0.75	0.35	0.09	0.75	-0.56	-0.58	0.15	CG12117	Sepiapterin reductase	Sptr	||sptr||Sptr||sepiapterin reductase||SR||CG12117||	31781	NA	700000000000	biological process|tetrahydrobiopterin biosynthesis|IEA|GO:0006729|Proteome|11002423//biological process|metabolism|IEA|GO:0008152|Proteome|11002423//molecular function|sepiapterin reductase activity|ISS|GO:0004757|Proteome|11002423//
								CG5808	-0.47	-0.1	-0.47	-0.25	0.31	0.84	0.66	-0.05	0.77	-0.81	-0.81	0.18	CG5808	CG5808	CG5808	||UKL||BcDNA:GH01073||cg5808||CG5808||	42957	3R	96A23	biological process|protein folding|IEA|GO:0006457|Proteome|11002423//biological process|protein folding|IEA|GO:0006457|Proteome|11002423//biological process|protein targeting|IEA|GO:0006605|Proteome|11002423//biological process|defense response|IEA|GO:000
								CG8614	-0.13	-0.37	-0.58	-0.25	0.42	0.87	0.44	0.26	1.04	-0.18	-0.87	0.49	CG8614	Neosin	Neos	||BcDNA.HL05936||Neos||l(3)L2249||CG8614||BcDNA:HL05936||	38795	3L	65000000000	molecular function|tRNA ligase activity|IEA|GO:0004812|Proteome|11002423//molecular function|ATP binding|IEA|GO:0005524|Proteome|11002423//biological process|protein biosynthesis|IEA|GO:0006412|Proteome|11002423//molecular function|mRNA binding|ISS|GO:000
								CG10447	-0.27	-0.39	-0.27	-0.17	0.31	0.42	0.43	0.1	0.74	-0.14	-0.56	0.19	CG10447	CG10447	CG10447	||CG10447||BcDNA:RH50436||	35261	2L	38A2	biological process|regulation of transcription from Pol II promoter|IEA|GO:0006357|Proteome|11002423//molecular function|transcription factor activity|IEA|GO:0003700|Proteome|11002423//biological process|transcription|NAS|GO:0006350|Proteome|11002423//cel
								CG11375	-0.49	-0.45	-0.56	-0.31	0.28	0.68	0.42	-0.1	0.93	-0.11	-0.61	0.33	CG11375	baf180	baf180	||baf180||BAF180||CG11375||anon-WO0140519.158||	42954	3R	96A22-96A23	cellular component|nucleus|IEA|GO:0005634|Proteome|11002423//biological process|regulation of transcription, DNA-dependent|ISS|GO:0006355|Proteome|11002423//molecular function|zinc ion binding|IEA|GO:0008270|Proteome|11002423//
								CG18190	-0.14	-0.34	0.19	-0.45	1.07	0.81	0.89	0.05	1	-0.46	-0.7	0.6	CG18190	CG18190	CG18190	||CG18190||	37179	2R	55F7	biological process|regulation of cell cycle|IEA|GO:0000074|Proteome|11002423//molecular function|receptor binding|IEA|GO:0005102|Proteome|11002423//biological process|cell cycle|IMP|GO:0007049|Proteome|11002423//molecular function|microtubule binding|ISS|
								CG32562	-0.69	-0.16	-0.08	-0.01	0.78	1.03	0.4	0.32	1.37	-0.16	-0.35	0.44	CG32562	xmas-2	xmas-2	||xmas-2||CG32562||CG8919||	44271	X	15E7-15F1	biological process|intracellular protein transport|IEA|GO:0006886|Proteome|11002423//molecular function|mRNA binding|ISS|GO:0003729|Proteome|11002423//biological process|spermatogenesis|NAS|GO:0007283|Proteome|11002423//biological process|embryonic develo
								CG10225	-0.75	-0.09	-0.51	-0.55	0.73	0.87	0.49	0.31	0.67	-0.14	-0.57	0.5	CG10225	CG10225	CG10225	||CG10225||	42804	3R	95B1	biological process|nucleobase, nucleoside, nucleotide and nucleic acid metabolism|IEA|GO:0006139|Proteome|11002423//biological process|protein targeting|IEA|GO:0006605|Proteome|11002423//biological process|intracellular protein transport|IEA|GO:0006886|Pr
								CG5371	-0.6	-0.24	-0.21	-0.44	0.65	0.81	0.72	0.12	1.18	-0.63	-0.91	0.56	CG5371	NA	NA	||RntL||RnrM1||Ribonucleoside diphosphate reductase M1 subunit||l(2)k06709||ribonucleoside-diphosphate reductase large subunit||CG5371||RNR1||DmRNR1||RnrL||	34392	2L	31D8	biological process|purine base metabolism|IEA|GO:0006144|Proteome|11002423//biological process|pyrimidine base metabolism|IEA|GO:0006206|Proteome|11002423//molecular function|ribonucleoside-diphosphate reductase activity|ISS|GO:0004748|Proteome|11002423//
								CG12752	-0.6	-0.43	-0.39	-0.33	0.62	0.96	0.56	0.12	0.87	-0.13	-0.75	0.38	CG12752	NTF2-related export protein 1	Nxt1	||Nxt||nxt1||Nxt1||CG12752||dmNXT1||DmNXT1||p15||dNxt||dmP15||	37769	2R	60A2	cellular component|nuclear membrane|IDA|GO:0005635|Proteome|11002423//cellular component|nucleoplasm|IDA|GO:0005654|Proteome|11002423//cellular component|cytoplasm|IEA|GO:0005737|Proteome|11002423//biological process|protein-nucleus import|ISS|GO:0006606|
								CG12366	-1.02	-0.37	-0.57	-0.18	1.16	1.41	0.87	0.36	1.36	-0.37	-0.91	0.47	CG12366	O-fucosyltransferase 1	O-fut1	||l(2)SH2260||ntc||l(2)SH2 2260||neurotic||nti||O-fut1||O-FUT1||4R6||CG12366||Ofut1||OFUT1||AAF58290.1||	36564	2R	500	cellular component|Golgi apparatus|IDA|GO:0005794|Proteome|11002423//cellular component|endoplasmic reticulum|TAS|GO:0005783|Proteome|11002423//molecular function|fucosyltransferase activity|ISS|GO:0008417|Proteome|11002423//biological process|neurogenesi
								CG1641	-0.67	-0.12	-0.51	-0.38	0.99	1.11	0.83	0.17	1.45	-0.61	-0.82	0.47	CG1641	sisterless A	sisA	||sisa||sisA||sis a||sis A||sis-a||sis-A||CG1641||	32068	X	10B2	biological process|endoderm development|IEA|GO:0007492|Proteome|11002423//biological process|anterior midgut development|IMP|GO:0007496|Proteome|11002423//biological process|posterior midgut development|IMP|GO:0007497|Proteome|11002423//biological process
								CG6066	-0.51	-0.01	-0.5	-0.29	0.72	0.93	0.71	0.25	0.94	-0.23	-0.81	0.44	CG6066	CG6066	CG6066	NA	43267	3R	97E2-97E3	NA
								CG9684	-0.52	-0.22	-0.02	-0.16	0.81	0.91	0.13	0.22	0.95	-0.52	-0.33	0.3	CG9684	CG9684	CG9684	||CG9684||	41000	3R	84F15	molecular function|nucleic acid binding|IEA|GO:0003676|Proteome|11002423//
								CG14112	-1.32	-0.53	-0.93	-1	1.76	2.23	0.69	0.82	2.93	-1.32	-1.63	0.7	CG14112	SoxNeuro Co-Factor	SNCF	||BcDNA:RE54375||SNCF||HL6||CG14112||	39496	3L	70A7	cellular component|nucleus|IEA|GO:0005634|Proteome|11002423//cellular component|nucleolus|ISS|GO:0005730|Proteome|11002423//biological process|positive regulation of transcription from Pol II promoter|NAS|GO:0045944|Proteome|11002423//molecular function|p
								CG9638	-0.44	-0.25	-0.23	-0.14	0.89	0.81	0.12	0.55	1.34	-0.69	-0.56	0.37	CG9638	Ada2b	Ada2b	||Transcriptional adapter 2S||CG9638||BcDNA:LD24527||ADA2b||Ada2b||ada2b||Ada2S||dAda2b||dAda2S||	40966	3R	84F5	cellular component|polytene chromosome|NAS|GO:0005700|Proteome|11002423//cellular component|polytene chromosome|NAS|GO:0005700|Proteome|11002423//molecular function|DNA binding|ISS|GO:0003677|Proteome|11002423//biological process|regulation of transcripti
								CG17002	-0.25	-0.25	-0.08	-0.25	0.71	0.91	0.35	0.15	1	-0.16	-0.65	0.5	CG17002	CG17002	CG17002	NA	35610	2R	420000	NA
								CG32095	-0.28	-0.36	0.14	-0.23	0.55	0.73	0.37	0.15	0.89	-0.47	-0.49	0.41	CG32095	CG32095	CG32095	||BEST:GH03217||CG32095||BcDNA:GH03217||	317849	NA	680	biological process|biological_process unknown|ND|GO:0000004|Proteome|11002423//molecular function|molecular_function unknown|ND|GO:0005554|Proteome|11002423//cellular component|cellular_component unknown|ND|GO:0008372|Proteome|11002423//
								CG12179	-0.42	-0.25	-0.37	-0.31	0.54	0.4	0.22	0.31	1	-0.67	-0.93	0.36	CG12179	CG12179	CG12179	NA	31393	X	4C10	NA
								CG4880	-0.41	-0.37	-0.76	-0.43	1.06	0.93	0.4	0.17	1.16	-1.38	-1.09	0.5	CG4880	CG4880	CG4880	NA	32680	X	15B4	NA
								CG15893	-0.12	-0.26	-0.2	-0.39	0.73	0.81	0.15	0.17	0.88	-0.63	-0.34	0.54	CG15893	CG15893	CG15893	NA	31575	X	5F1-5F2	NA
								CG4166	-0.15	-0.35	-0.31	-0.56	0.89	0.75	0.29	0.31	0.72	-0.58	-0.71	0.36	CG4166	non-stop	not	||not||nonstop||l(3)02069||l(3)j9A6||anon-WO0257455.9||CG4166||i155||	40030	3L	75D4	molecular function|nucleic acid binding|IEA|GO:0003676|Proteome|11002423//molecular function|cysteine-type endopeptidase activity|IEA|GO:0004197|Proteome|11002423//molecular function|ubiquitin thiolesterase activity|TAS|GO:0004221|Proteome|11002423//cellu
								CG10901	-0.1	-0.63	-0.43	-0.66	1.61	1.4	-0.29	0.37	1.74	-1.46	-1.28	0.71	CG10901	oskar	osk	||osk||CG10901||	41066	3R	85B7	cellular component|polar granule|TAS|GO:0018994|Proteome|11002423//biological process|long-term memory|TAS|GO:0007616|Proteome|11002423//biological process|pole cell fate determination|NAS|GO:0007278|Proteome|11002423//biological process|oocyte anterior/p
								CG18543	-0.32	-0.82	-0.27	-1.09	1.61	1.28	-0.16	0.31	1.55	-1.27	-1.22	0.67	CG18543	matrimony	mtrm	||mtrm||D52||anon-D52||CG18543||anonD52||	38958	NA	66C11	biological process|female meiosis chromosome segregation|IMP|GO:0016321|Proteome|11002423//cellular component|nucleus|IEA|GO:0005634|Proteome|11002423//biological process|cell cycle arrest|IEA|GO:0007050|Proteome|11002423//molecular function|molecular_fun
								CG2079	-0.11	0.2	-0.29	0.01	0.63	0.65	-0.09	0.2	1.02	-0.55	-0.72	0.61	CG2079	lethal (1) G0331	l(1)G0331	||l(1)G0331||CG2079||	31667	X	7B1	molecular function|insulin receptor binding|ISS|GO:0005158|Proteome|11002423//
								CG11825	-0.32	-0.3	-0.31	0.25	1.27	1.61	0.32	0.44	2.67	-0.87	-1.01	0.86	CG11825	CG11825	CG11825	NA	36099	2R	47A7	NA
								CG8308	-0.23	-0.5	-0.11	0.02	0.93	1.07	0.32	0.19	1.59	-1.05	-0.44	0.65	CG8308	NA	NA	NA	192347	NA	NA	NA
								CG2848	-0.14	-0.4	-0.19	0.01	0.63	0.68	0	0.41	0.99	-0.54	-0.81	0.92	CG2848	Transportin-Serine/Arginine rich	Trn-SR	||CG2848||dTRN-SR||Trn-SR||anon-EST:Posey294||	33465	2L	23A3-23A5	cellular component|nucleus|IEA|GO:0005634|Proteome|11002423//cellular component|cytoplasm|IEA|GO:0005737|Proteome|11002423//biological process|splicing factor protein-nucleus import|IPI|GO:0035048|Proteome|11002423//biological process|protein-nucleus impo
								CG4265	-0.02	-0.32	-0.63	-0.26	0.77	1.28	0.15	0.16	1.55	-0.54	-0.96	0.8	CG4265	Ubiquitin carboxy-terminal hydrolase	Uch	||uch||Uch||UCH||uch-D||UCH-D||UBL||CG4265||ubiquitin carboxyl terminal hydrolase||	33397	2L	22D4	molecular function|ubiquitin thiolesterase activity|TAS|GO:0004221|Proteome|11002423//biological process|protein deubiquitination|IEA|GO:0016579|Proteome|11002423//cellular component|intracellular|IEA|GO:0005622|Proteome|11002423//biological process|prote
								CG7384	-0.12	-0.04	-0.05	-0.02	0.67	1.16	0.26	0.22	1.15	-0.58	-0.99	0.74	CG7384	CG7384	CG7384	NA	34447	2L	31F4	NA
								CG15092	-0.3	-0.55	-0.34	-0.45	0.78	1.32	0.06	0.1	1.37	-1.29	-1.01	0.94	CG15092	CG15092	CG15092	NA	37164	2R	55F1	NA
								CG5272	-0.09	-0.33	-0.24	0.06	0.69	1.32	0.04	0.26	1.12	-1.09	-1.18	0.66	CG5272	giant nuclei	gnu	||gnu||Gnu||CG5272||	45868	NA	70F6	biological process|mitosis|IMP|GO:0007067|Proteome|11002423//biological process|regulation of cell cycle|IEA|GO:0000074|Proteome|11002423//biological process|mitosis|IMP|GO:0007067|Proteome|11002423//biological process||IMP|GO:0007343|Proteome|11002423//b
								CG9187	-0.27	0.11	-0.66	-0.55	0.79	0.96	0.64	-0.01	0.27	-0.2	-0.57	0.02	CG9187	CG9187	CG9187	NA	38136	NA	61F4	NA
								CG3036	-0.19	0.37	-0.01	0.12	0.57	0.65	0.63	0.04	0.32	-0.11	-0.02	0.22	CG3036	CG3036	CG3036	||CG3036||CT10168||	33695	2L	25B1-25B2	biological process|carbohydrate metabolism|IEA|GO:0005975|Proteome|11002423//biological process|phosphate metabolism|IEA|GO:0006796|Proteome|11002423//biological process|cation transport|IEA|GO:0006812|Proteome|11002423//biological process|extracellular t
								CG31673	-0.01	-0.15	-0.17	0.02	0.41	0.83	0.44	0.18	0.27	-0.02	-0.04	0.1	CG31673	CG31673	CG31673	||BcDNA:LD14730||CG9332||CG31673||	35348	2L	38F1	biological process|carbohydrate metabolism|IEA|GO:0005975|Proteome|11002423//biological process|L-serine biosynthesis|IEA|GO:0006564|Proteome|11002423//biological process|amino acid biosynthesis|IEA|GO:0008652|Proteome|11002423//molecular function|glyoxyl
								CG3988	-0.38	-1.15	-1.2	-1.29	0.97	0.26	-0.59	0.22	0.01	-0.11	-0.24	-0.19	CG3988	NA	NA	NA	192347	NA	NA	NA
								CG7425	-0.34	-0.36	-0.48	-0.4	0.65	-0.37	-0.22	0.44	-0.13	-0.17	-0.48	-0.44	CG7425	effete	eff	||ms(3)ry1||ms(3)ry3||ms(3)01295||l(3)j2C8||mei68||Suppressor of GMR-sina 3-3||l(3)01462||UBC4||ubcD1||UbcD1||UBCD1||3527||anon-WO0118547.343||eff||6535||l(3)s1782||ms(3)1||ms(3)3||meiotic 68||ms(3)88D||ms(3)neo2||SS3-3||Ubiquitin conjugating enzyme 1||UB	41785	3R	88D2	molecular function|ligase activity|IEA|GO:0016874|Proteome|11002423//molecular function|ubiquitin conjugating enzyme activity|NAS|GO:0004840|Proteome|11002423//molecular function|ubiquitin conjugating enzyme activity|NAS|GO:0004840|Proteome|11002423//biol
								CG7590	-0.22	-0.54	-0.8	-0.58	0.94	0.07	-0.36	0.11	0.04	-0.53	-0.64	-0.65	CG7590	scylla	scyl	||scyl||scy||CG7590||anon-WO0118547.215||	39270	3L	68B4-68C1	biological process|negative regulation of growth|IMP|GO:0045926|Proteome|11002423//
								CG11155	-1.01	-0.54	-0.81	-0.5	0.71	0.09	-0.05	0.29	-0.07	-0.31	-0.04	0.01	CG11155	CG11155	CG11155	||CT30863||CG11155||	43822	4	102D4-102D5	molecular function|glutamate-gated ion channel activity|IEA|GO:0005234|Proteome|11002423//molecular function|potassium channel activity|ISS|GO:0005267|Proteome|11002423//biological process|cation transport|IEA|GO:0006812|Proteome|11002423//biological proc
								CG17521	-0.3	-0.39	-0.14	-0.09	0.65	-0.02	-0.04	0.34	0.22	-0.35	-0.32	-0.2	CG17521	Qm	Qm	||anon-EST:Posey179||DQM||CG17521||Ribosomal protein L10||Qm||BcDNA:LD24589||RpL10||Ribosome RL10||	43864	3L	80D1-80D2	molecular function|nucleic acid binding|IEA|GO:0003676|Proteome|11002423//molecular function|structural constituent of ribosome|IEA|GO:0003735|Proteome|11002423//cellular component|cytosolic large ribosomal subunit (sensu Eukarya)|NAS|GO:0005842|Proteome|
								CG9772	-0.28	-0.1	-0.09	-0.21	0.85	0.41	0.29	0.41	0.57	-0.47	-0.97	0.03	CG9772	CG9772	CG9772	||CG9772||	40548	3R	82A4	biological process|ubiquitin-dependent protein catabolism|IEA|GO:0006511|Proteome|11002423//cellular component|SCF ubiquitin ligase complex|TAS|GO:0019005|Proteome|11002423//
								CG7398	-0.35	-0.59	-1	-0.21	0.69	0.35	-0.3	0.59	0.73	-0.91	-0.96	0.21	CG7398	Transportin	Trn	||dTRN||Tm||Trn||TRN||transportin||Transportin||Trn1||CG7398||	38721	3L	65A8	biological process|protein-nucleus import, docking|IEA|GO:0000059|Proteome|11002423//cellular component|cytoplasm|IEA|GO:0005737|Proteome|11002423//cellular component|nuclear pore|IDA|GO:0005643|Proteome|11002423//biological process|protein-nucleus import
								CG31760	-0.3	-0.25	-0.51	-0.3	0.59	-0.15	-0.14	0.26	0.23	-0.49	-0.31	-0.14	CG31760	CG31760	CG31760	||CG17214||BcDNA:RE52162||CG17215||CG31760||	34642	NA	33D2	cellular component|membrane|IEA|GO:0016020|Proteome|11002423//biological process||ISS|GO:0007214|Proteome|11002423//molecular function|metabotropic glutamate, GABA-B-like receptor activity|IEA|GO:0008067|Proteome|11002423//
								CG1554	-0.24	-0.32	-0.17	-0.24	0.46	0.05	0.09	0.47	0.6	-0.52	-0.58	-0.06	CG1554	RNA polymerase II 215kD subunit	RpII215	||L5||RNAPII||RNAP II||POL||l(1)L5||RNAP||Rpll215||l(1)10Ca||l(1)DF912||Rpb1||RPB1||l(1)G0040||polII||pol II||RNApolII||RNA polII||RNA Pol II||RNAP II LS||Ubl||RNA polymerase II large subunit||RpII215||l(1)DC912||II||RNA polymerase II||RpII||5||Pol II CTD	32100	X	10C6-10C7	molecular function|nucleic acid binding|IEA|GO:0003676|Proteome|11002423//molecular function|DNA binding|ISS|GO:0003677|Proteome|11002423//biological process|mRNA transcription|IEA|GO:0009299|Proteome|11002423//molecular function|DNA-directed RNA polymera
								CG32479	-0.29	-0.32	-0.46	-0.85	0.69	0.09	-0.18	0.39	0.7	-0.8	-1.04	-0.03	CG32479	CG32479	CG32479	||CG13903||CG32479||CG12503||	38103	3L	61D2-61D4	molecular function|cysteine-type endopeptidase activity|IEA|GO:0004197|Proteome|11002423//molecular function|ubiquitin thiolesterase activity|TAS|GO:0004221|Proteome|11002423//biological process|proteolysis and peptidolysis|NAS|GO:0006508|Proteome|1100242
								CG5554	-0.73	-0.39	-0.94	-0.77	1.11	-0.03	0.19	0.21	0.79	-0.59	-1.31	-0.25	CG5554	CG5554	CG5554	||CG5554||	37775	2R	60A3	molecular function|electron transporter activity|IEA|GO:0005489|Proteome|11002423//biological process|electron transport|IEA|GO:0006118|Proteome|11002423//biological process|protein folding|IEA|GO:0006457|Proteome|11002423//biological process|protein modi
								CG7917	-0.55	-0.51	-0.76	-0.9	1.38	0.21	-0.01	0.61	0.55	-0.81	-1.38	-0.3	CG7917	Nucleoplasmin	Nlp	||CG7917||p22||Chromatin decondensation protein 1||Crp1||CRP1||nucleoplasmin-1||Nlp||Nucleoplasmin-like||dNLP||dNLP-S||	43560	3R	99D1	cellular component|nucleus|IEA|GO:0005634|Proteome|11002423//cellular component|nucleolus|ISS|GO:0005730|Proteome|11002423//molecular function|nucleic acid binding|IEA|GO:0003676|Proteome|11002423//cellular component|nucleus|IEA|GO:0005634|Proteome|110024
								CG40293	-0.01	-0.3	-0.35	-0.29	0.64	-0.08	-0.58	0.34	0.67	-0.88	-0.9	-0.07	CG40293
								CG14030	-0.31	-0.09	-0.07	0.26	0.58	0.2	-0.05	0.38	0.95	-0.93	-0.79	0.08	CG14030	CG14030	CG14030	||CG14030||Bub1||BUB1-like||	33758	2L	25D3	biological process|mitotic spindle checkpoint|IMP|GO:0007094|Proteome|11002423//biological process|regulation of cell cycle|IEA|GO:0000074|Proteome|11002423//molecular function|receptor signaling protein serine/threonine kinase activity|IEA|GO:0004702|Pro
								CG1620	-0.11	-0.41	-0.11	-0.1	0.33	-0.03	0.01	0.11	0.6	-0.47	-0.25	0.14	CG1620	CG1620	CG1620	||CG1620||	35678	2R	43C5-43C6	molecular function|DNA binding|ISS|GO:0003677|Proteome|11002423//cellular component|nucleus|IEA|GO:0005634|Proteome|11002423//
								CG3924	-0.09	-0.51	-0.37	-0.38	0.81	0.47	-0.2	0.27	0.89	-0.7	-0.86	-0.03	CG3924	Chip	Chi	||Ldb||chip||Chi||dLdb||l(2)k04405||dLDB/Chip||CG3924||l(2)04405||	37837	2R	60B4	cellular component|nucleus|IEA|GO:0005634|Proteome|11002423//molecular function|transcription cofactor activity|IEA|GO:0003712|Proteome|11002423//biological process|regulation of transcription from Pol II promoter|IEA|GO:0006357|Proteome|11002423//biologi
								CG18145	-0.33	-0.42	-0.34	-0.23	0.94	0.47	-0.23	0.18	1.43	-0.81	-0.96	0.1	CG18145	NA	NA	NA	192347	NA	NA	NA
								CG6235	-0.14	-0.15	-0.14	-0.33	0.53	0.37	-0.22	0.08	1.04	-0.72	-0.58	0.02	CG6235	twins	tws	||l(3)S063110||l(3)S060203||l(3)S032303||l(3)01436||l(3)S023141a||l(3)S027313||l(3)S105605||aar||l(3)S060804||l(3)S048006||l(3)S026226||l(3)j11C8||l(3)S080409||l(3)S042629||l(3)S069206a||l(3)S067109b||l(3)S067915||tws/aar||abnormal anaphase resolution||14	47877	3R	85F13-85F14	cellular component|cytoplasm|IEA|GO:0005737|Proteome|11002423//biological process|MAPKKK cascade|IEA|GO:0000165|Proteome|11002423//biological process|response to stress|NAS|GO:0006950|Proteome|11002423//biological process|defense response|IEA|GO:0006952|P
								CG11614	-0.35	-0.46	0.1	-0.59	0.6	0.02	0.52	0.15	-0.13	-0.06	-0.23	0.09	CG11614	naked cuticle	nkd	||naked||Naked||CG18224||nkd||Nkd||CG11614||	44843	3L	75F2-75F4	biological process|frizzled signaling pathway|NAS|GO:0007222|Proteome|11002423//
								CG12389	-1.03	-0.47	-0.03	-0.4	0.64	0.06	0.65	0.19	0.05	-0.06	-0.52	-0.16	CG12389	Farnesyl pyrophosphate synthase	Fpps	||v(2)k03514||fps||FPS||fpps||Fpps||CG12389||l(2)k06103||Farnesyl diphosphate synthase||	36209	2R	47F1	biological process||IC|GO:0045337|Proteome|11002423//biological process|cholesterol metabolism|IEA|GO:0008203|Proteome|11002423//molecular function|acyltransferase activity|IEA|GO:0008415|Proteome|11002423//biological process|germ cell migration|TAS|GO:00
								CG3605	-0.75	-0.64	0.03	-0.55	0.5	0.25	0.7	0.28	-0.09	-0.24	-0.73	-0.18	CG3605	CG3605	CG3605	||CG3605||	33514	2L	23C5	biological process|nuclear mRNA splicing, via spliceosome|NAS|GO:0000398|Proteome|11002423//biological process|nuclear mRNA splicing, via spliceosome|NAS|GO:0000398|Proteome|11002423//biological process|nuclear mRNA splicing, via spliceosome|NAS|GO:000039
								CG31363	-0.99	-0.79	-0.99	-0.19	0.95	-0.11	0.17	0.05	0.17	0.05	-0.63	-0.13	CG31363	Jupiter	Jupiter	||CG18762||Jupiter||CG18763||anon-EST:Liang-1.76||BcDNA:GH06373||BcDNA:LD21358||BcDNA:LD43690||BcDNA:RH53211||BEST:LP05168||CG31363||anon-WO0140519.173||clone 1.76||CG17238||	41392	3R	86E11-86E13	cellular component|microtubule cytoskeleton|IEA|GO:0015630|Proteome|11002423//biological process|biological_process unknown|ND|GO:0000004|Proteome|11002423//molecular function|molecular_function unknown|ND|GO:0005554|Proteome|11002423//
								CG8882	-0.21	-0.86	-0.6	-0.5	0.9	0.27	0.23	0.19	0.31	0.23	-0.49	0.31	CG8882	Trip1	Trip1	||Trip1||DmTRIP||eIF3-S2||CG8882||	33710	2L	25B5	molecular function|translation initiation factor activity|NAS|GO:0003743|Proteome|11002423//molecular function|translation initiation factor activity|NAS|GO:0003743|Proteome|11002423//cellular component|eukaryotic translation initiation factor 3 complex|N
								CG5252	-0.38	-0.22	-0.51	-0.5	0.7	0.3	0.44	0.63	0.81	-0.12	-0.55	0.04	CG5252	Ranbp9	Ranbp9	||CG5252||Ranbp9||	41367	3R	860000	biological process|protein-nucleus import, docking|IEA|GO:0000059|Proteome|11002423//cellular component|nucleus|IEA|GO:0005634|Proteome|11002423//cellular component|nuclear pore|IDA|GO:0005643|Proteome|11002423//cellular component|cytoplasm|IEA|GO:0005737
								CG6444	-0.24	-0.3	-0.45	-0.58	0.26	0.68	0.52	0.14	0.46	0.23	-0.57	0.26	CG6444	CG6444	CG6444	NA	34480	2L	32A5	NA
								CG1133	-0.9	-0.61	-0.74	-1.17	0.66	0.86	0.59	0.31	0.87	-0.1	-0.99	-0.46	CG1133	odd paired	opa	||opa||odd-paired||CG1133||GLI-Kr zinc finger pair-rule protein||	40605	3R	820	biological process|regulation of transcription from Pol II promoter|IEA|GO:0006357|Proteome|11002423//molecular function|zinc ion binding|IEA|GO:0008270|Proteome|11002423//biological process|cell proliferation|IEA|GO:0008283|Proteome|11002423//biological
								CG14715	-0.49	-0.65	-0.55	-0.89	0.47	0.62	0.3	0.19	0.54	-0.06	-0.6	0.13	CG14715	CG14715	CG14715	||BcDNA:RH50927||CG14715||BcDNA:GM09283||	41403	3R	8.6e+16	biological process|regulation of cell cycle|IEA|GO:0000074|Proteome|11002423//biological process|protein folding|IEA|GO:0006457|Proteome|11002423//biological process|protein folding|IEA|GO:0006457|Proteome|11002423//biological process|calcium-mediated sig
								CG10683	-0.49	-0.55	-0.2	-0.67	0.34	1.01	0.41	0.2	0.73	-0.46	-0.69	0.23	CG10683	rhino	rhi	||rhi||CG10683||HP1D||rno||	44879	NA	54D2	cellular component|chromatin|NAS|GO:0000785|Proteome|11002423//biological process|chromatin assembly or disassembly|IEA|GO:0006333|Proteome|11002423//biological process|eggshell pattern formation (sensu Insecta)|IMP|GO:0030381|Proteome|11002423//molecular
								CG6697	-0.78	-0.68	-0.47	-0.95	0.92	1.14	0.41	0.06	1.1	-0.28	-0.95	0.33	CG6697	CG6697	CG6697	NA	42726	3R	94D10	NA
								CG3396	-0.87	-0.25	-0.55	-0.62	1.01	-0.4	1.17	0.36	0.49	-0.42	-0.83	-0.2	CG3396	Ocho	Ocho	NA	39621	3L	71A4	NA
								CG4528	-0.74	-0.35	-0.38	-0.66	0.92	0.43	0.67	0.2	0.58	-0.71	-0.55	0.01	CG4528	sans fille	snf	||snRNP B''||SNF/D25||splicing necessary factor||fs(1)1621||fs(1)A1621||snf||Snf||SNF||U2 snRNP B'' protein||D25||liz||snf1621||fs(1)A16121||U2 snRNP||simply not fertile||CG4528||	31442	X	4F4	cellular component|nucleus|IEA|GO:0005634|Proteome|11002423//cellular component|small nuclear ribonucleoprotein complex|ISS|GO:0030532|Proteome|11002423//biological process|regulation of alternative nuclear mRNA splicing, via spliceosome|IMP|GO:0000381|Pr
								CG10522	-0.39	0.06	-0.15	-0.24	0.71	0.1	0.73	0.04	0.05	-0.37	-0.62	-0.18	CG10522	NA	NA	NA	192347	NA	NA	NA
								CG17579	-0.55	-0.27	-0.3	-0.91	0.66	0.5	1.18	0.17	0.34	-0.22	-0.86	-0.05	CG17579	scabrous	sca	||mAb sca1||Sca1b||anon-EST:Liang-38||clone 38||sca||Sca||CG17579||	36411	2R	49D3	molecular function|receptor binding|IEA|GO:0005102|Proteome|11002423//biological process|defense response|IEA|GO:0006952|Proteome|11002423//biological process|ectoderm development|IEA|GO:0007398|Proteome|11002423//biological process|defense response to ba
								CG4722	-0.66	-0.19	-0.13	-0.72	1.08	0.57	1.22	0.22	0.32	-0.34	-1.2	-0.21	CG4722	big brain	bib	||CG4722||l(2)neo91||EP(2)2278||BIB_DROME||l(2)neo66||bib||m-bib||	34330	2L	30F5	molecular function||IDA|GO:0015281|Proteome|11002423//molecular function|carrier activity|IEA|GO:0005386|Proteome|11002423//molecular function|binding|TAS|GO:0005488|Proteome|11002423//biological process|transport|IEA|GO:0006810|Proteome|11002423//biologi
								CG16788	-0.71	-0.72	-0.26	-0.62	1.04	0.34	0.94	0.25	0.54	-0.02	-0.64	0.02	CG16788	RNA-binding protein S1	RnpS1	||cg16788||CG16788||RnpS1||DEK||RRM-domain protein||	41147	3R	85D24	biological process|nuclear mRNA splicing, via spliceosome|NAS|GO:0000398|Proteome|11002423//biological process|transcription from Pol II promoter|IEA|GO:0006366|Proteome|11002423//molecular function|mRNA binding|ISS|GO:0003729|Proteome|11002423//biologica
								CG14896	-0.62	-0.5	-0.14	-0.92	0.75	0.26	1.06	0.22	0.72	-0.57	-0.86	0.18	CG14896	CG14896	CG14896	NA	41998	3R	89B17	NA
								CG4206	-0.42	-0.37	-0.14	-0.57	1.15	0.15	0.99	0.3	0.75	-0.24	-0.87	0.33	CG4206	Minichromosome maintenance 3	Mcm3	||Minichromosome maintenance-PCR2||Mcm3||MCM3||DmMcm3||DmMCM3||Mcp-PCR2||dMCM3||CG4206||PCR2||	31449	X	4F5	molecular function|nucleotide binding|IEA|GO:0000166|Proteome|11002423//molecular function|DNA helicase activity|IEA|GO:0003678|Proteome|11002423//molecular function|DNA replication origin binding|IEA|GO:0003688|Proteome|11002423//molecular function|ATP b
								CG7892	-0.59	-0.48	-0.76	-0.53	1.05	-0.09	0.37	0.43	0.29	0.11	-1.07	-0.36	CG7892	nemo	nmo	||adk||adirondack||NEMO/NLK||CG7892||Nlk||anon-WO0172774.138||clone 2.43||anon-EST:Gibbs3||nmo||anon-EST:Liang-2.43||anon-WO0140519.256||Nemo||NEMO||anon-WO0118547.332||	38890	3L	66A22-66B3	biological process|MAPKKK cascade|IEA|GO:0000165|Proteome|11002423//molecular function|receptor signaling protein serine/threonine kinase activity|IEA|GO:0004702|Proteome|11002423//molecular function|MAP kinase activity|NAS|GO:0004707|Proteome|11002423//m
								CG12369	-1.15	-0.85	-2	-1.48	1.37	-0.01	0.45	0.82	0.24	-0.97	-1.66	-0.84	CG12369	Lachesin	Lac	||lac||Lac||l(2)k11012b||lachesin bulbous||bulb||lachesin||CT24921||bulbous||CG12369||l(2)k11012||	36363	2R	49A6-49A7	cellular component|septate junction|ISS|GO:0005918|Proteome|11002423//biological process|homophilic cell adhesion|TAS|GO:0007156|Proteome|11002423//biological process|signal transduction|IEA|GO:0007165|Proteome|11002423//biological process|cell-cell adhes
								chic	-1.22	-0.34	-1.32	-0.65	0.89	-0.09	0.34	0.78	0.11	-0.2	-0.66	-0.43	chic
								CG12262	-0.83	-0.45	-0.48	-1.16	1.02	0.26	0.12	0.76	0.54	-0.11	-1.02	-0.42	CG12262	CG12262	CG12262	||CG12262||	38864	NA	66A10	biological process|electron transport|IEA|GO:0006118|Proteome|11002423//biological process|acyl-CoA metabolism|IDA|GO:0006637|Proteome|11002423//molecular function|acyl-CoA dehydrogenase activity|ISS|GO:0003995|Proteome|11002423//molecular function|acyl-C
								CG16792	-1	-0.78	-0.6	-0.47	0.6	0.15	0.83	0.59	0.23	-0.3	-1.08	-0.38	CG16792	Developmental embryonic B	DebB	||deb-b||Deb-B||BcDNA:GM23968||Deb||CG16792||DebB||	36314	2R	48000000	cellular component|small nucleolar ribonucleoprotein complex|IEA|GO:0005732|Proteome|11002423//biological process|nuclear mRNA splicing, via spliceosome|NAS|GO:0000398|Proteome|11002423//biological process|nuclear mRNA splicing, via spliceosome|NAS|GO:000
								CG3619	-0.91	-0.5	-0.69	-0.91	1.27	0.07	1.07	0.69	0.48	-0.81	-1.07	-0.55	CG3619	Delta	Dl	||0926/11||0495/20||D||1119/09||1485/04||l(3)j8C3||delta||Delta||l(3)05151||Complementation group 1||Dl||CT12133||Overflow||C1||anon-WO0118547.269||1440/11||1304/03||dmDelta||1423/11||1053/14||CG3619||l(3)92Ab||delta D1||	42313	3R	92A1-92A2	molecular function|Notch binding|TAS|GO:0005112|Proteome|11002423//cellular component|plasma membrane|ISS|GO:0005886|Proteome|11002423//molecular function|calcium ion binding|IEA|GO:0005509|Proteome|11002423//biological process|cell proliferation|IEA|GO:0
								CG1403	-0.87	-0.34	-0.93	-0.17	0.68	0.41	0.53	0.07	0.31	-1.04	-0.88	-0.17	CG1403	Septin-1	2009-09-01	||CG1403||septin||septin 1||iby||Sep1||sep1||tu1||anon-19Fa||innocent bystander||Diff6||	33114	X	19F5	molecular function|GTPase activity|ISS|GO:0003924|Proteome|11002423//molecular function|structural constituent of cytoskeleton|IEA|GO:0005200|Proteome|11002423//biological process|mitosis|IMP|GO:0007067|Proteome|11002423//molecular function|protein bindin
								CG40354	-1.18	-0.57	-0.83	-0.54	0.73	0.21	0.56	0.14	0.25	-0.48	-0.91	-0.28	CG40354
								CG9075 (00001-00239)	-1.23	-0.58	-0.88	-0.42	0.88	0.17	0.95	0.35	0.38	-1	-1.07	-0.38	CG9075 (00001-00239)
								CG11981	-0.78	-0.79	-0.76	-0.64	1.33	0.84	0.64	0.75	0.86	0.22	-0.7	0.29	CG11981	NA	NA	NA	192347	NA	NA	NA
								CG6341	-0.42	-0.45	-0.28	-0.52	1.19	0.49	0.37	0.48	0.24	0.06	-0.42	0.34	CG6341	NA	NA	NA	192347	NA	NA	NA
								CG2257	-0.71	-0.73	-1.11	-1.05	0.62	0.36	-0.15	-0.07	0.41	-0.36	-1.12	-0.08	CG2257	NA	NA	||dUbc-E2H||CG2257||Ubc-E2H||	31728	X	7D6	biological process|protein modification|IEA|GO:0006464|Proteome|11002423//biological process|ubiquitin cycle|IEA|GO:0006512|Proteome|11002423//molecular function|ligase activity|IEA|GO:0016874|Proteome|11002423//biological process|protein metabolism|IEA|G
								CG8715	-1.13	-1.08	-1.31	-1.17	0.83	0.26	0.14	-0.02	0.64	-0.11	-0.82	0.21	CG8715	lingerer	lig	||transcription unit A||lig||CG8715||	43894	NA	44A4	biological process|copulation|IMP|GO:0007620|Proteome|11002423//cellular component|cytoplasm|IEA|GO:0005737|Proteome|11002423//biological process|copulation|IMP|GO:0007620|Proteome|11002423//biological process|copulation|IMP|GO:0007620|Proteome|11002423//
								CG4211	-0.56	-0.47	-0.22	-0.59	0.91	-0.13	0.43	0.19	-0.16	-0.3	-0.64	-0.53	CG4211	no on or off transient A	nonA	||no-on transient A||Bj6-1||CG4211||Bj6||diss||dissonance||Bj6-monoclonal-antibody||non-A||nonA||NonA||x14||no-on-transient A||Positive spike II group||opm2||nonA/diss||	32603	X	14B18-14C1	biological process|mesoderm development|NAS|GO:0007498|Proteome|11002423//biological process|hemopoiesis|NAS|GO:0030097|Proteome|11002423//molecular function|transcription regulator activity|IEA|GO:0030528|Proteome|11002423//biological process|nuclear mRN
								CG6398	-1.12	-0.85	-0.33	-0.64	1.19	-0.02	0.34	0.07	0.07	-0.28	-1.05	-0.22	CG6398	CG6398	CG6398	NA	32761	X	16D5-16D7	NA
								CG11219	-0.78	-0.73	-0.94	-0.46	0.85	0.79	0.8	0.35	0.31	-0.26	-0.55	0.01	CG11219	PIP82	PIP82	NA	31791	X	7F3	NA
								CG13867	-0.31	-0.37	-0.57	-0.23	0.62	0.28	0.72	0.15	0.44	-0.06	-0.32	0.18	CG13867
								CG6932	-0.25	-0.63	-0.67	-0.47	0.62	0.38	0.63	0.33	0.4	0.01	-0.73	0.05	CG6932	COP9 complex homolog subunit 6	CSN6	||CH6||CSN6||Drosophila COP9 signalosome homolog 6||Dch6||CG6932||	42661	3R	94B5	biological process|regulation of cell cycle|IEA|GO:0000074|Proteome|11002423//biological process|proteolysis and peptidolysis|NAS|GO:0006508|Proteome|11002423//cellular component|signalosome complex|ISS|GO:0008180|Proteome|11002423//
								CG1796	-1.14	-0.56	-0.43	-0.6	0.91	0.25	0.14	0.2	0.75	-0.62	-0.77	0.1	CG1796	CG1796	CG1796	||CG1796||	32168	X	11A1	biological process|signal transduction|IEA|GO:0007165|Proteome|11002423//
								CG6422	-0.57	-0.43	-0.31	-0.35	0.59	0.23	-0.08	0.1	0.38	-0.5	-0.81	0.07	CG6422	CG6422	CG6422	NA	42995	3R	96B17	NA
								CG31715	-0.45	-0.66	-0.23	-1.1	0.69	0.42	0.36	0.32	0.39	-0.32	-0.47	-0.03	CG31715	CG31715	CG31715	||CG31715||BcDNA:RE44624||	318909	2L	31D9	biological process|biological_process unknown|ND|GO:0000004|Proteome|11002423//molecular function|molecular_function unknown|ND|GO:0005554|Proteome|11002423//cellular component|cellular_component unknown|ND|GO:0008372|Proteome|11002423//
								CG5640	-0.17	-0.26	-0.23	-0.73	0.67	0.24	0.19	0	0.13	-0.15	-0.29	-0.1	CG5640	CG5640	CG5640	||CG5640||	34377	2L	31C3	biological process|regulation of transcription from Pol II promoter|IEA|GO:0006357|Proteome|11002423//molecular function|transcriptional repressor activity|NAS|GO:0016564|Proteome|11002423//
								CG1519	-0.48	-0.38	-0.68	-1.26	0.75	0.43	0.16	0.23	0.21	-0.19	-0.97	0.04	CG1519	NA	NA	NA	192347	NA	NA	NA
								CG4912	-0.33	-0.36	-0.47	-0.96	0.79	0.46	0.38	0.02	0.31	0.09	-0.77	-0.22	CG4912	NA	NA	NA	192347	NA	NA	NA
								CG11001	-0.63	-0.61	-0.61	-0.83	1.04	0.13	0.26	0.41	-0.09	0.05	-0.53	-0.34	CG11001	FK506-binding protein 2	FK506-bp2	||dFKBP12||FKBP||DrFKBP12||FK506-bp2||FK506-binding protein||CG11001||FKBP12||	37214	2R	56C8	molecular function|peptidyl-prolyl cis-trans isomerase activity|TAS|GO:0003755|Proteome|11002423//molecular function|FK506 binding|ISS|GO:0005528|Proteome|11002423//cellular component|cytoplasm|IEA|GO:0005737|Proteome|11002423//biological process|protein
								CG7911	-0.64	-0.7	-0.69	-1.47	1.21	0	0.68	0.32	0.06	-0.07	-0.73	-0.25	CG7911	CG7911	CG7911	||CG7911||	43559	3R	99D1	molecular function|nucleic acid binding|IEA|GO:0003676|Proteome|11002423//cellular component|nucleus|IEA|GO:0005634|Proteome|11002423//
								CG9742	-0.62	-0.74	-0.48	-1.14	1.07	0.15	0.58	0.25	0.07	0.14	-0.44	-0.03	CG9742	CG9742	CG9742	||CG9742||BcDNA:RE61341||BcDNA:RH35475||	32636	X	14F4	cellular component|small nucleolar ribonucleoprotein complex|IEA|GO:0005732|Proteome|11002423//biological process|spliceosome assembly|NAS|GO:0000245|Proteome|11002423//biological process|nuclear mRNA splicing, via spliceosome|NAS|GO:0000398|Proteome|1100
								CG10565	-0.96	-0.55	-0.47	-0.66	0.63	0.14	0.73	0.17	0.04	-0.03	-0.35	-0.27	CG10565	CG10565	CG10565	||CG10565||	40332	3L	78B2	molecular function|nucleic acid binding|IEA|GO:0003676|Proteome|11002423//molecular function|DNA binding|ISS|GO:0003677|Proteome|11002423//cellular component|nucleus|IEA|GO:0005634|Proteome|11002423//biological process|protein folding|IEA|GO:0006457|Prote
								CG13425	-0.61	-0.45	-0.46	-0.58	1.29	0.31	0.78	0.47	0.18	0.3	-0.57	-0.24	CG13425	bancal	bl	||Hrb57A||CG13425||Q18||l(2)k08305||Heterogeneous nuclear ribonucleoprotein at 57A||bl||	43862	NA	57A7	cellular component|nucleus|IEA|GO:0005634|Proteome|11002423//cellular component|chromatin|NAS|GO:0000785|Proteome|11002423//cellular component|nucleus|IEA|GO:0005634|Proteome|11002423//cellular component|omega speckle|IDA|GO:0035062|Proteome|11002423//bio
								CG5185	-1.28	-0.62	-0.75	-1.51	2.73	0.16	1.78	0.66	0.37	-0.48	-1.64	-0.34	CG5185	Twin of m4	Tom	||Tom||bbu/tom||anon-fast-evolving-1F6||Bbu||barbu||Barbu||CG5185||anon-EST:fe1F6||	39619	3L	71A3	cellular component|cytoplasm|IEA|GO:0005737|Proteome|11002423//biological process|Notch signaling pathway|IMP|GO:0007219|Proteome|11002423//biological process|cell fate specification|TAS|GO:0001708|Proteome|11002423//biological process|establishment of pl
								CG31613	-0.81	-0.21	-0.75	-0.97	1.1	0.07	1.01	0.22	0.02	-0.16	-0.48	0	CG31613	His3:CG31613	His3:CG31613	||CG31613||His3:CG31613||	318847	2L	390	cellular component|nucleosome|IEA|GO:0000786|Proteome|11002423//molecular function|DNA binding|ISS|GO:0003677|Proteome|11002423//biological process|nucleosome assembly|IEA|GO:0006334|Proteome|11002423//
								CG5825	-0.7	-0.18	-0.36	-0.66	0.73	0.09	0.85	-0.03	-0.05	-0.12	-0.53	-0.07	CG5825	NA	NA	NA	192347	NA	NA	NA
								CG1910	-1.16	-0.44	-0.52	-0.63	1.38	0.22	0.95	0.11	0.37	0.05	-0.45	-0.03	CG1910	CG1910	CG1910	||anon-fast-evolving-1A3||anon1A3||Anon1A3||anon-WO0118547.398||CG1910||1A3||anon-WO0118547.745||anon-EST:fe1A3||	43741	3R	100D2	biological process|biological_process unknown|ND|GO:0000004|Proteome|11002423//molecular function|molecular_function unknown|ND|GO:0005554|Proteome|11002423//cellular component|cellular_component unknown|ND|GO:0008372|Proteome|11002423//
								CG3069	-0.93	-0.03	-0.4	-0.93	1.17	0.12	0.66	0.3	0.43	-0.1	-0.51	-0.03	CG3069	TBP-associated factor 10b	Taf10b	||TFIID||TAF<down>II</down>||Taf16||TafII16||TAFII16||TAF<down>II</down>16||TBP-associated factor 16kD||dtafII16||dTAF<down>II</down>16||TAF||CG3069||Taf10b||TAF10b||dmTAF10b||	33468	2L	23A5	molecular function|RNA polymerase II transcription factor activity|ISS|GO:0003702|Proteome|11002423//cellular component|transcription factor TFIID complex|ISS|GO:0005669|Proteome|11002423//biological process|transcription initiation from Pol II promoter|I
								CG3510	-1.1	-1.49	-1.3	-0.97	1.03	0.73	0.02	0.88	1.1	-0.83	-1.64	0.3	CG3510	Cyclin B	CycB	||Cyclin-B||cycB||CycB||cyc B||mAbF2F4||DmcycB||CG3510||cyclinB||CyclinB||cyclin B||2g||cyc-B||	37618	2R	59B2	molecular function|cyclin-dependent protein kinase regulator activity|NAS|GO:0016538|Proteome|11002423//biological process|regulation of cell cycle|IEA|GO:0000074|Proteome|11002423//biological process|regulation of cell cycle|IEA|GO:0000074|Proteome|11002
								CG5175	-1.32	-1.85	-1.34	-1.59	1.41	0.54	0.37	0.67	0.72	-0.7	-1.96	-0.01	CG5175	kugelkern	kuk	NA	42063	3R	89000000000000	NA
								CG7109	-0.74	-0.71	-0.6	-0.8	1	-0.02	0.15	0.39	0.29	-0.64	-0.73	0.04	CG7109	microtubule star	mts	||PP2a 28D||PP2A 28D||PP2A<down>C</down>||ER2-6||Pp2A-28D||PP2||PP2A||Pp2A||l(2)02496||mts||PP2Ac||catalytic subunit C of type 2A protein phosphatase||MTS/PP2A||Protein phosphatase 2A at 28D||dPP2A||l(2)s5286||5559||phosphatase 2A catalytic subunit||CG710	45959	2L	28D1-28D2	biological process|R7 cell fate commitment|TAS|GO:0007465|Proteome|11002423//molecular function|protein phosphatase type 2A activity|ISS|GO:0000158|Proteome|11002423//biological process|protein amino acid dephosphorylation|NAS|GO:0006470|Proteome|11002423
								CG12749	-1.33	-1.28	-1.03	-1.15	1.36	0.42	0.67	0.52	0.39	0.16	-0.79	-0.18	CG12749	Heterogeneous nuclear ribonucleoprotein at 87F	Hrb87F	||Q16||Hrb85CD||Hrb87f||Hrb87F||CG12749||P11/Hrb87F||P11||Hrb87Fa||hnRNA-binding protein 2||p38||hrp36||Hrp36||HRP36||HRB87F/hrp36||Heterogeneous nuclear ribonucleoprotein at 85CD||Q14||hrp40||Hrb2||	48535	3R	87F7	cellular component|nucleus|IEA|GO:0005634|Proteome|11002423//cellular component|chromatin|NAS|GO:0000785|Proteome|11002423//cellular component|nucleus|IEA|GO:0005634|Proteome|11002423//cellular component|nucleoplasm|IDA|GO:0005654|Proteome|11002423//cellu
								CG2922	-0.89	-0.78	-0.77	-1.19	0.9	0.11	0.15	0.11	0.23	-0.25	-0.58	-0.35	CG2922
								CG4429	-1.02	-0.87	-0.99	-1.09	1.18	-0.05	0.31	0.39	0.27	-0.2	-0.4	-0.62	CG4429	RNA-binding protein 2	Rbp2	||eIF4H||rrm2||RRM2||cg4429||CG4429||Rbp2||anon-EST:fe1B9||anon-fast-evolving-1B9||	49809	X	14C6-14C8	molecular function|mRNA binding|ISS|GO:0003729|Proteome|11002423//molecular function|translation initiation factor activity|NAS|GO:0003743|Proteome|11002423//cellular component|cytosol|NAS|GO:0005829|Proteome|11002423//biological process|translational ini
								CG11177	-1.99	-1.44	-1.25	-1.07	1.18	0.43	0.35	0.41	0.47	-0.2	-0.83	0.14	CG11177	BthD selenoprotein	BthD	||BthD||CG11177||dselM||	32317	X	12A8	biological process|redox signal response|NAS|GO:0006980|Proteome|11002423//molecular function|molecular_function unknown|ND|GO:0005554|Proteome|11002423//cellular component|cellular_component unknown|ND|GO:0008372|Proteome|11002423//
								CG3379	-1.2	-0.65	-0.96	-0.75	0.96	0.02	0.35	0.31	0.31	-0.46	-0.47	-0.12	CG3379	Histone H4 replacement	His4r	||CG3379||His4r||His4R||His4-88CD||H4r||BcDNA:RH52884||	41773	NA	88C9	cellular component|nucleosome|IEA|GO:0000786|Proteome|11002423//molecular function|DNA binding|ISS|GO:0003677|Proteome|11002423//biological process|chromatin assembly or disassembly|IEA|GO:0006333|Proteome|11002423//
								CG4800	-1.58	-1	-1.09	-0.98	1.12	0.24	0.02	0.35	0.56	-0.45	-0.86	-0.27	CG4800	Translationally controlled tumor protein	Tctp	||Tctp||TCTP||CG4800||dTCTP||	41341	3R	86D8	molecular function|DNA binding|ISS|GO:0003677|Proteome|11002423//molecular function||IEA|GO:0004803|Proteome|11002423//molecular function|structural constituent of cytoskeleton|IEA|GO:0005200|Proteome|11002423//biological process||IEA|GO:0006313|Proteome|
								CG15742	-0.76	-0.67	-0.74	-0.72	0.67	0.12	0.1	-0.07	0.07	-0.04	-0.42	-0.1	CG15742	CG15742	CG15742	NA	32276	X	1100000000	NA
								CG4254	-1.39	-1.62	-1.74	-1.21	0.95	0.33	0.43	0.22	0.11	-0.16	-0.77	-0.33	CG4254	twinstar	tsr	||l(2)03101||cofilin||Cofilin||Cofilin/actin depolymerizing factor-like||ntf||cofilin/actin depolymerizing factor homolog||no terminal filament||D-cof||12/8||D61||Adf||T8||Cadf||l(2)k03101||ADFcofilin||tsr||CG4254||l(2)k05633||l(2)k13409||ADF/cofilin||cof	37841	2R	60B5	molecular function|structural constituent of cytoskeleton|IEA|GO:0005200|Proteome|11002423//cellular component|intracellular|IEA|GO:0005622|Proteome|11002423//biological process|protein complex assembly|IEA|GO:0006461|Proteome|11002423//biological process
								CG31729	-0.7	-0.72	-0.91	-0.44	0.79	0.09	-0.19	0.3	-0.06	-0.22	-0.47	-0.21	CG31729	CG31729	CG31729	||CG31729||CG6263||CG16823||	34736	2L	34B4-34B5	molecular function|ATP binding|IEA|GO:0005524|Proteome|11002423//biological process|lipid metabolism|IEA|GO:0006629|Proteome|11002423//biological process|lipid transport|IEA|GO:0006869|Proteome|11002423//cellular component|membrane|IEA|GO:0016020|Proteome
								CG2207	-2.32	-2.42	-3.62	-1.78	2.61	0.34	0.51	1.09	0.7	-0.78	-1.56	-0.55	CG2207	NA	NA	NA	192347	NA	NA	NA
								CG31196	-0.99	-1.08	-1.93	-1.01	1.71	0.08	0.08	0.36	0.21	-0.27	-1.04	-0.52	CG31196	NA	NA	NA	192347	NA	NA	NA
								CG3265	-0.69	-0.7	-0.93	-0.32	1.6	0.27	0.52	0.45	0.52	-0.69	-0.86	-0.19	CG3265	Eb1	Eb1	||S(DmcycE<up>JP</up>)2.5||EB-1||clone 2.33||Eb1||EB1||BcDNA:LD08743||clone 2.52||Dm EB1||dEB-1||CG3265||dEb1||dEB1||BcDNA.LD08743||anon-EST:Liang-2.33||l(2)4524||l(2)04524||anon-EST:Liang-2.52||	35584	2R	42C8	biological process|mitotic spindle elongation|IDA|GO:0000022|Proteome|11002423//cellular component|microtubule|IEA|GO:0005874|Proteome|11002423//biological process|chromosome segregation|IEA|GO:0007059|Proteome|11002423//biological process||IDA|GO:0051227
								CG5499	-1.3	-1	-1.46	-0.86	2	0.36	0.5	0.61	0.59	-0.79	-1.56	-0.01	CG5499	Histone H2A variant	His2Av	||l(3)05146||His2AvD||H2Av||H2A.Z||l(3)L1602||H2AZ||H2AvD||CG5499||l(3)97Dd||l(3)810||His2Av||	43229	3R	97D5	cellular component|nucleus|IEA|GO:0005634|Proteome|11002423//cellular component|chromosome|IDA|GO:0005694|Proteome|11002423//cellular component|polytene chromosome|NAS|GO:0005700|Proteome|11002423//biological process|nucleosome assembly|IEA|GO:0006334|Pro
								CG7664	-0.89	-0.45	-0.67	-0.76	1.03	-0.16	0.74	0.64	0.25	-0.13	-0.45	-0.08	CG7664	cropped	crp	||l(2)35Fd||CG7664||AP-4||MS:35F.AT17||crp||AP4||l(2)SH1614||l(2)00232||dAP-4||l(2)k03505||l(2)SH2 1614||BG:DS02740.3||l(2)k00809||35F(AT)<down>17</down>||	34956	2L	35F1	molecular function|RNA polymerase II transcription factor activity|ISS|GO:0003702|Proteome|11002423//cellular component|nucleus|IEA|GO:0005634|Proteome|11002423//molecular function|RNA polymerase II transcription factor activity|ISS|GO:0003702|Proteome|11
								CG9894	-1.43	-0.86	-0.71	-1.08	1.67	0.19	0.9	0.77	0.16	-0.04	-0.62	-0.17	CG9894	CG9894	CG9894	||CG9894||anon-EST:Liang-2.54||clone 2.54||	33462	2L	23A3	cellular component|nucleus|IEA|GO:0005634|Proteome|11002423//
								CG3613	-1.04	-0.68	-0.44	-0.54	0.98	0.06	0.87	0.14	0.32	-0.28	-0.58	-0.27	CG3613	quaking related 58E-1	qkr58E-1	||KH-domain||qkr-58-E||qrk58E-1||qkr58E-1||CG3613||	37561	2R	58D8	biological process|nucleobase, nucleoside, nucleotide and nucleic acid metabolism|IEA|GO:0006139|Proteome|11002423//biological process|apoptosis|IEA|GO:0006915|Proteome|11002423//biological process|spermatogenesis|NAS|GO:0007283|Proteome|11002423//biologi
								CG12487	-2.71	-0.96	-2.01	-1.98	2.14	-0.73	2.02	0.95	0.51	-1.01	-1.58	-0.81	CG12487	Brother of Bearded A	BobA	||CG12487||Bob||BobA||	53572	NA	71A1-71A2	biological process|cell fate specification|TAS|GO:0001708|Proteome|11002423//biological process|Notch signaling pathway|IMP|GO:0007219|Proteome|11002423//biological process|sensory organ development|TAS|GO:0007423|Proteome|11002423//biological process|sen
								CG17950	-1.9	-1.15	-1.06	-1.8	1.56	-0.14	0.85	0.59	0.27	-0.74	-1.2	-0.57	CG17950	High mobility group protein D	HmgD	||HmgD||HMG D||CG17950||dHMG-D||clone 1.9||hmg-D||HMG-D||anon-EST:Liang-1.9||	37481	2R	57F10	cellular component|nuclear chromatin|NAS|GO:0000790|Proteome|11002423//molecular function|AT DNA binding|IDA|GO:0003680|Proteome|11002423//biological process|establishment and/or maintenance of chromatin architecture|NAS|GO:0006325|Proteome|11002423//mole
								CG7583	-1.55	-0.95	-0.87	-0.95	1.14	0.13	0.88	0.39	0.28	-0.79	-0.65	-0.5	CG7583	C-terminal Binding Protein	CtBP	||G9||CG7583||0256/16||BcDNA:GH07572||l(3)87De||CtBP||ctbp||RE01030||EP(3)3528||dCtBP||l(3)03463||l(3)G9||l(3)03464||256/16||lethal(3)87De||RE61183||	41602	3R	87D8-87D9	biological process|L-serine biosynthesis|IEA|GO:0006564|Proteome|11002423//molecular function|oxidoreductase activity, acting on the CH-OH group of donors, NAD or NADP as acceptor|ISS|GO:0016616|Proteome|11002423//biological process|embryonic development
								CG13465	-2	-1.51	-2.48	-1.91	2.2	-0.7	2.1	0.47	0.34	-0.13	-1.62	-0.58	CG13465	CG13465	CG13465	NA	50282	3L	71A2	NA
								CG18081	-0.91	-0.61	-1.06	-0.6	0.99	-0.13	0.36	0.17	-0.11	-0.24	-0.74	-0.44	CG18081	CG18081	CG18081	NA	39725	3L	72A2	NA
								CG9373	-0.89	-0.58	-0.85	-0.83	1.14	0.3	0.79	0.3	0.26	0.02	-0.85	-0.01	CG9373	CG9373	CG9373	||cg9373||CG9373||	41138	3R	85D18-85D21	molecular function|mRNA binding|ISS|GO:0003729|Proteome|11002423//
								CG8580	-1.35	-1.14	-1.21	-0.83	1.62	0.12	0.75	0.33	0.24	-0.36	-1	-0.28	CG8580	NA	NA	NA	192347	NA	NA	NA
								CG9952	-1.17	-1.02	-1.32	-1.15	1.74	-0.01	0.85	0.41	0.15	-0.44	-1.34	-0.29	CG9952	partner of paired	ppa	||I-55||ppa||Ppa||CG9952||	37602	2R	59A1-59A2	cellular component|nuclear ubiquitin ligase complex|ISS|GO:0000152|Proteome|11002423//biological process|ubiquitin-dependent protein catabolism|IEA|GO:0006511|Proteome|11002423//cellular component|SCF ubiquitin ligase complex|TAS|GO:0019005|Proteome|11002
								CG17161	-0.6	-0.37	-0.45	-0.3	0.76	0.14	0.39	0.45	0.34	-0.06	-0.67	-0.01	CG17161	grapes	grp	||last empress||Checkpoint kinase 1||1C||Pk36A||Chk1||CHK1||Protein kinase-like 36A||CHK1/Grapes||grp||CG17161||Pk?1||dChk1||lemp||	34993	NA	36A10	cellular component|nucleus|IEA|GO:0005634|Proteome|11002423//molecular function|receptor signaling protein serine/threonine kinase activity|IEA|GO:0004702|Proteome|11002423//molecular function|ATP binding|IEA|GO:0005524|Proteome|11002423//biological proce
								CG12000	-0.44	-0.57	-0.42	-0.34	1.09	0.5	0.3	0.24	0.41	-0.35	-1.21	-0.18	CG12000	CG12000	CG12000	||&bgr;-type 4 subunit||anon-WO0118547.326||GC12000||CG12000||	40639	3R	82F11	biological process||IMP|GO:0050875|Proteome|11002423//molecular function|endopeptidase activity|IEA|GO:0004175|Proteome|11002423//cellular component|proteasome core complex (sensu Eukarya)|IEA|GO:0005839|Proteome|11002423//molecular function|endopeptidase
								CG9412	-0.48	-0.68	-0.22	-0.58	0.96	0.36	0.43	0.48	0.54	-0.37	-0.88	-0.01	CG9412	rasputin	rin	||Next to squid||rin||cg9412||CG9412||Nts||rasp||	47998	3R	87F6-87F7	cellular component|cytosol|NAS|GO:0005829|Proteome|11002423//molecular function|receptor binding|IEA|GO:0005102|Proteome|11002423//cellular component|nucleus|IEA|GO:0005634|Proteome|11002423//biological process|regulation of translation|TAS|GO:0006445|Pro
								CG15220	-0.93	-0.3	-0.47	-0.42	1.07	0.18	0.54	0.34	1.01	-0.55	-1.08	0.07	CG15220	CG15220	CG15220	||CG15220||BcDNA:RH55360||	32113	X	10D1	molecular function|DNA binding|ISS|GO:0003677|Proteome|11002423//biological process|DNA replication|IEA|GO:0006260|Proteome|11002423//cellular component|DNA replication factor A complex|IDA|GO:0005662|Proteome|11002423//
								CG17952	-0.83	-0.53	-0.32	-0.37	1.39	0.41	0.79	0.38	0.67	-0.86	-1.23	-0.2	CG17952	NA	NA	||LBR||CG17952||dLBR||	37482	2R	57F10-57F11	cellular component|nuclear inner membrane|IDA|GO:0005637|Proteome|11002423//molecular function|receptor activity|IEA|GO:0004872|Proteome|11002423//molecular function|lamin binding|NAS|GO:0005521|Proteome|11002423//cellular component|nuclear inner membrane
								CG1433	-0.68	-0.55	-0.58	-0.27	0.59	0.61	0.81	0.04	0.46	-0.25	-0.72	0.04	CG1433	Another transcription unit	Atu	||l(3)s1938||Atu||CG1433||	40684	3R	83B6	biological process|biological_process unknown|ND|GO:0000004|Proteome|11002423//molecular function|molecular_function unknown|ND|GO:0005554|Proteome|11002423//cellular component|cellular_component unknown|ND|GO:0008372|Proteome|11002423//
								CG4978	-1.07	-0.82	-0.57	-0.37	1.41	0.53	1.09	0.23	0.68	-0.48	-1.16	0.18	CG4978	Minichromosome maintenance 7	Mcm7	||anon-EST:Liang-1.66||Mcp-PCR1||mcm7||Mcm7||MCM7||DmMCM7||PCR1||CG4978||clone 1.66||Minichromosome maintenance-PCR1||	39014	3L	66000	molecular function|nucleotide binding|IEA|GO:0000166|Proteome|11002423//molecular function|DNA helicase activity|IEA|GO:0003678|Proteome|11002423//molecular function|DNA replication origin binding|IEA|GO:0003688|Proteome|11002423//molecular function|ATP b
								CG5855	-0.4	-0.33	-0.3	-0.29	0.97	0.41	0.42	0.15	0.65	-0.16	-0.47	0.28	CG5855	cornichon	cni	||spnG||CG5855||BG:DS02740.13||cni||spindle-G||anon-35Fe||IV||	34967	2L	35F8	molecular function|receptor binding|IEA|GO:0005102|Proteome|11002423//biological process|intracellular signaling cascade|IEA|GO:0007242|Proteome|11002423//biological process|ER to Golgi transport|IMP|GO:0006888|Proteome|11002423//biological process|blasto
								CG2910	-0.53	-0.39	-0.48	-0.34	0.84	0.58	0.79	0.41	0.93	-0.1	-0.83	0.17	CG2910	spenito	nito	||nito||dOTT||Dm44A/spenito||BcDNA:GH11110||cg2910||CG2910||One Twenty Two||DmSSp||	35756	2R	43F8-43F9	molecular function|mRNA binding|ISS|GO:0003729|Proteome|11002423//
								CG3284	-0.55	-0.48	-0.35	-0.19	0.92	0.52	0.31	-0.04	0.76	-0.29	-0.89	0	CG3284	RNA polymerase II 15kD subunit	RpII15	||dRPB9||RNAP II||l(3)88Be||RpII215||l(3)Z23||RNAP||RNA polymerase II||RpII15||RPII15||CG3284||Pol II||H5||8WG16||PolII||polII||RNApolII||Pol IIa||RNA Pol II||RNA pol II||RNA polII||	41741	3R	88B3	molecular function|nucleic acid binding|IEA|GO:0003676|Proteome|11002423//molecular function|DNA binding|ISS|GO:0003677|Proteome|11002423//molecular function|transcription factor activity|IEA|GO:0003700|Proteome|11002423//biological process|RNA elongation
								CG4570	-0.95	-0.53	-0.88	-0.18	1.04	1.23	0.4	0.5	1.26	-0.63	-1.33	0.42	CG4570	CG4570	CG4570	||CG4570||	41306	3R	86C7	molecular function|DNA binding|ISS|GO:0003677|Proteome|11002423//molecular function||IEA|GO:0004803|Proteome|11002423//cellular component|nucleus|IEA|GO:0005634|Proteome|11002423//biological process||IEA|GO:0015074|Proteome|11002423//
								CG4303	-0.93	-0.75	-0.65	-0.75	1.55	0.94	0.64	0.25	0.87	-0.04	-1.45	0.12	CG4303	Brahma associated protein 60kD	Bap60	||i133||brahma associated protein 60 kDa||i127||CG4303||BRM-associated protein 60||BAP60||Bap60||BAPp60||	32268	X	110	molecular function|transcription coactivator activity|ISS|GO:0003713|Proteome|11002423//cellular component|brahma complex|TAS|GO:0035060|Proteome|11002423//biological process|positive regulation of transcription, DNA-dependent|IDA|GO:0045893|Proteome|1100
								CG5935	-0.7	-0.42	-0.43	-0.35	0.92	0.64	0.29	0.37	0.66	-0.16	-0.94	0.23	CG5935	Dek	Dek	||CG5935||l(2)k09907||Dek||DEK||anon-WO0172774.191||anon-WO0172774.192||anon-WO0172774.194||dDEK||EG:EG0003.6||CG593||l(2)04154||	43921	NA	53D14	molecular function|DNA binding|ISS|GO:0003677|Proteome|11002423//cellular component|nucleus|IEA|GO:0005634|Proteome|11002423//biological process|mRNA processing|NAS|GO:0006397|Proteome|11002423//
								CG10686	-1.54	-1.77	-1.44	-1.05	1.67	0.82	0.12	0.55	0.73	-0.02	-1.58	0.46	CG10686	NA	NA	NA	192347	NA	NA	NA
								CG12070	-0.46	-0.55	-0.28	-0.27	0.85	0.28	0.37	-0.09	0.17	-0.06	-0.74	0.05	CG12070	Saposin-related	Sap-r	||P110||Apa||anon-EST:ParkEST270||110kD protein||sap-r||Sap-r||CG12070||Aggregation promoting activity||Sapr||DAPA||Drosophila Aggregation promoting activity||BcDNA:GH08312||	43662	3R	100A6-100A7	cellular component|lysosome|IEA|GO:0005764|Proteome|11002423//biological process|lipid metabolism|IEA|GO:0006629|Proteome|11002423//biological process|lipid metabolism|IEA|GO:0006629|Proteome|11002423//biological process||IDA|GO:0006665|Proteome|11002423/
								CG12276	-1.29	-0.82	-0.47	-1.01	1.72	0.63	0.79	0.1	0.5	-0.18	-1.38	0.13	CG12276	Aos1	Aos1	||Smt3 activating enzyme 1||Sae1||SAE1||DmSae1||DmSAE1||Ubiquitin activating enzyme||CG12276||Aos1||Dmaos1||DmAos1||	41532	3R	87B10	cellular component|nucleus|IEA|GO:0005634|Proteome|11002423//biological process||IDA|GO:0051092|Proteome|11002423//molecular function|ubiquitin activating enzyme activity|NAS|GO:0004839|Proteome|11002423//biological process|protein modification|IEA|GO:000
								CG7098	-0.58	-0.34	-0.17	-0.43	0.68	0.24	0.26	0.21	0.29	-0.05	-0.41	0.24	CG7098	diskette	dik	||HL-XIV||dik||Ada3||CG7098||dAda3||DADA3||	32787	NA	16F6	cellular component|polytene chromosome|NAS|GO:0005700|Proteome|11002423//cellular component|histone acetyltransferase complex|ISS|GO:0000123|Proteome|11002423//cellular component|histone acetyltransferase complex|ISS|GO:0000123|Proteome|11002423//molecula
								CG30499	-0.84	-0.88	-0.41	-0.96	1.15	0.97	0.47	0.3	0.81	0.09	-0.75	0.6	CG30499	CG30499	CG30499	||CG1364||CG30499||	35692	2R	43D7	molecular function||IEA|GO:0004750|Proteome|11002423//biological process|carbohydrate metabolism|IEA|GO:0005975|Proteome|11002423//biological process|pentose-phosphate shunt|NAS|GO:0006098|Proteome|11002423//molecular function|isomerase activity|IEA|GO:00
								CG10281	-0.97	-0.59	-0.47	-0.96	1.39	0.67	0.82	0.28	0.63	-0.42	-0.6	0.3	CG10281	NA	NA	NA	192347	NA	NA	NA
								CG31611	-1.62	-1.24	-1.18	-2.09	2.1	1.25	1.14	0.36	1.42	-0.4	-1.4	0.85	CG31611	His4:CG31611	His4:CG31611	||His4:CG31611||CG31611||	318846	NA	390	cellular component|nucleosome|IEA|GO:0000786|Proteome|11002423//cellular component|nucleosome|IEA|GO:0000786|Proteome|11002423//molecular function|DNA binding|ISS|GO:0003677|Proteome|11002423//cellular component|nucleus|IEA|GO:0005634|Proteome|11002423//b
								CG30122	-1.16	-0.9	-0.56	-0.6	1.08	0.61	0.64	0.3	0.76	-0.08	-0.59	0.34	CG30122	CG30122	CG30122	||CG5477||CG30122||CG18610||LD11002||	37146	2R	55000	molecular function|DNA binding|ISS|GO:0003677|Proteome|11002423//molecular function|mRNA binding|ISS|GO:0003729|Proteome|11002423//biological process|RNA elongation from Pol II promoter|IEA|GO:0006368|Proteome|11002423//molecular function|mRNA binding|ISS
								CG4976	-0.87	-0.61	-0.28	-0.66	1.04	0.74	0.74	0.39	0.86	-0.33	-0.59	0.63	CG4976	Mes-4	Mes-4	||dMes-4||dMES-4||CG4976||Mes-4||	43351	3R	98B6	molecular function|histone methyltransferase activity|NAS|GO:0042054|Proteome|11002423//cellular component|ubiquitin ligase complex|IEA|GO:0000151|Proteome|11002423//molecular function|DNA binding|ISS|GO:0003677|Proteome|11002423//molecular function|ubiqu
								CG31618	-2.07	-2.05	-1.41	-1.63	2.83	1.61	0.92	0.78	1.86	-0.61	-1.98	1.38	CG31618	His2A:CG31618	His2A:CG31618	||CG31618||His2A:CG31618||BEST:CK01438||	318855	NA	390	cellular component|nucleosome|IEA|GO:0000786|Proteome|11002423//cellular component|nucleosome|IEA|GO:0000786|Proteome|11002423//molecular function|DNA binding|ISS|GO:0003677|Proteome|11002423//molecular function|DNA binding|ISS|GO:0003677|Proteome|1100242
								CG6875	-0.96	-0.87	-0.62	-0.5	1.09	0.82	0.68	0.25	0.88	-0.52	-0.94	0.74	CG6875	abnormal spindle	asp	||anon-WO0118547.279||anon-96Aa||CG6875||asp||Asp||	42946	3R	96A19-96A20	biological process|microtubule cytoskeleton organization and biogenesis|IMP|GO:0000226|Proteome|11002423//molecular function|protein kinase activity|TAS|GO:0004672|Proteome|11002423//cellular component|microtubule organizing center|IDA|GO:0005815|Proteome
								CG1548	-1.08	-0.62	-0.88	-0.69	1.74	1.03	0.95	0.39	0.5	-0.27	-1.06	0.08	CG1548	cathD	cathD	||CATH||CT3996||cathepsin D||T17||CG1548||cathD||	45268	2R	4.3e+19	molecular function||IEA|GO:0004194|Proteome|11002423//biological process|proteolysis and peptidolysis|NAS|GO:0006508|Proteome|11002423//biological process|proteolysis and peptidolysis|NAS|GO:0006508|Proteome|11002423//biological process|salivary gland cel
								CG9193	-0.93	-0.83	-1.56	-1.19	1.83	0.91	0.99	0.41	0.73	-0.39	-1.67	0.43	CG9193	mutagen-sensitive 209	mus209	||mus209||l(2)56F||CG9193||PCNA/mus209||l(2)56Fa||l(2)02448||pcna||Pcna||PCNA||DmPCNA||proliferating cell nuclear antigen||53/13||Proliferating-cell-nuclear-antigen||l(2)s1534||	37290	2R	56F11	molecular function|nucleic acid binding|IEA|GO:0003676|Proteome|11002423//molecular function|DNA binding|ISS|GO:0003677|Proteome|11002423//cellular component|nucleus|IEA|GO:0005634|Proteome|11002423//biological process|regulation of DNA replication|IEA|GO
								CG13427	-1.93	-2.23	-3.04	-3.07	3.05	0.88	1.34	0.82	1.15	-1.06	-2.45	-0.4	CG13427	CG13427	CG13427	NA	37316	2R	57A5	NA
								CG8960	-1.79	-1.2	-1.49	-2.72	2.23	0.92	1.14	0.76	0.77	-0.44	-1.9	-0.26	CG8960	CG8960	CG8960	NA	38280	3L	62D2	NA
								CG17949	-1.39	-0.84	-1.59	-2.66	2.49	0.46	0.89	0.69	0.72	-0.05	-1.55	0.17	CG17949	His2B:CG17949	His2B:CG17949	NA	326273	NA	NA	NA
								CG5676	-1.29	-0.8	-1.26	-1.71	2.19	0.32	0.42	0.54	0.6	0.02	-1.03	-0.14	CG5676	CG5676	CG5676	NA	34368	2L	31B4	NA
								CG8108	-0.48	-0.78	-0.58	-0.59	0.9	0.52	0.25	0.26	0.44	-0.56	-0.83	-0.04	CG8108	CG8108	CG8108	||CG8108||BcDNA:GH07921||	39161	3L	67C11-67D1	molecular function|nucleic acid binding|IEA|GO:0003676|Proteome|11002423//cellular component|nucleus|IEA|GO:0005634|Proteome|11002423//molecular function|zinc ion binding|IEA|GO:0008270|Proteome|11002423//
								CG8553	-0.94	-1.05	-0.81	-0.94	1.57	0.93	0.61	0.31	0.69	-0.71	-1.03	-0.25	CG8553	selenide	SelD	||Dm-SelD||SPS1||selD||SelD||SeS||ptuf1||anon-WO0172774.145||l(2)k12303||anon-WO0172774.146||patufet||Dm SelD||selD-like||Selenophosphate synthetase||ptf1||ptuf||CG8553||	36587	2R	5000000000	molecular function|selenide, water dikinase activity|NAS|GO:0004756|Proteome|11002423//molecular function|selenide, water dikinase activity|NAS|GO:0004756|Proteome|11002423//molecular function|ATP binding|IEA|GO:0005524|Proteome|11002423//biological proce
								CG5266	-1.09	-1.02	-0.45	-1.24	1.06	0.95	0.45	0.32	0.51	-0.29	-1.11	0.23	CG5266	Proteasome 25kD subunit	Pros25	||PROS-Dm25g||d&agr;2||20s proteasome||20S proteasome||Proteasome subunit &agr;-type 2||PRC3||Pros25||PROS Dm25||Proteosome||&agr;2_dm||CG5266||	41531	3R	87B10	biological process||IMP|GO:0050875|Proteome|11002423//molecular function|endopeptidase activity|IEA|GO:0004175|Proteome|11002423//cellular component|proteasome core complex (sensu Eukarya)|IEA|GO:0005839|Proteome|11002423//cellular component|proteasome co
								CG11137	-1.3	-1.07	-0.52	-1.19	1.09	0.63	0.27	0.21	0.42	-0.19	-0.82	-0.01	CG11137	CG11137	CG11137	NA	40505	NA	80B2	NA
								CG5930	-0.73	-0.82	-0.35	-0.8	0.83	0.25	0.3	0.16	0.21	-0.11	-0.59	0.02	CG5930	Transcription factor IIA L	TfIIA-L	||dTFIIA||CT18631||CG5930||TFIIA||TfIIA-L||TFIIA-L||	43284	3R	9700000000000	molecular function|transcription initiation factor activity|NAS|GO:0016986|Proteome|11002423//cellular component|transcription factor TFIIA complex|ISS|GO:0005672|Proteome|11002423//cellular component|transcription factor TFIIA complex|ISS|GO:0005672|Prot
								CG17331	-0.48	-0.58	-0.59	-0.91	1.16	0.37	0.28	0.2	0.37	-0.36	-0.97	0.1	CG17331	CG17331	CG17331	||GC17331||CG17331||	34999	2L	36A12	biological process|proteolysis and peptidolysis|NAS|GO:0006508|Proteome|11002423//biological process|ubiquitin-dependent protein catabolism|IEA|GO:0006511|Proteome|11002423//biological process||IMP|GO:0050875|Proteome|11002423//molecular function|endopept
								CG1240	-0.96	-0.95	-0.74	-1.32	1.24	0.35	0.49	0.59	0.52	-0.63	-1.39	-0.36	CG1240	CG1240	CG1240	NA	38341	3L	62F3	NA
								CG40080	-0.86	-0.91	-0.54	-1.11	1.28	0.45	0.47	0.24	0.9	-0.58	-1.27	-0.11	CG40080
								CG4584	-1.29	-0.8	-1	-1.23	1.42	0.93	0.72	0.78	0.96	-0.45	-1.45	-0.08	CG4584	Deoxyuridine triphosphatase	dUTPase	||UTPase||LD08534||dUTPase||BcDNA:LD08534||CG4584||	250412	NA	32C5	molecular function|dUTP diphosphatase activity|ISS|GO:0004170|Proteome|11002423//biological process|nucleobase, nucleoside, nucleotide and nucleic acid metabolism|IEA|GO:0006139|Proteome|11002423//biological process||IEA|GO:0046080|Proteome|11002423//mole
								CG5363	-1.37	-0.8	-0.84	-1.71	1.84	0.69	0.72	0.72	0.99	-0.81	-1.75	0.15	CG5363	cdc2	cdc2	||l(2)31Eh||Dcdc2||group 4||cdk1||Cdk1||CDK1||cdc||Dmcdc2||DmCdc2||Dm cdc2||cdc2Dm||CDK1/CDC2||DmCdk1||CDC2 kinase||Cdc2 kinase||CDCDm||CG5363||cdc2||Cdc2||CDC2||	34411	2L	31D11	biological process|protein amino acid phosphorylation|ISS|GO:0006468|Proteome|11002423//molecular function|receptor signaling protein serine/threonine kinase activity|IEA|GO:0004702|Proteome|11002423//molecular function|ATP binding|IEA|GO:0005524|Proteome
								CG1871	-0.89	-0.75	-0.72	-0.92	1.4	0.14	0.24	0.29	0.73	-0.46	-0.79	0.33	CG1871	NA	NA	||e(r)||CG1871||ER||	43951	X	8B7	biological process|regulation of transcription from Pol II promoter|IEA|GO:0006357|Proteome|11002423//molecular function|transcription regulator activity|IEA|GO:0030528|Proteome|11002423//
								CG5848	-0.8	-1.13	-0.56	-1.2	1.19	0.66	0.25	0.32	0.67	-0.03	-0.87	0.33	CG5848	cactus	cact	||dip6||CG5848||cact||CACT||BG:DS02740.15||n(2)k17003||fs(2)ltoRN48||female-sterile-(2)-ltoRN48||cac||	34969	2L	35F9-35F11	cellular component|cytoplasm|IEA|GO:0005737|Proteome|11002423//biological process|regulation of transcription from Pol II promoter|IEA|GO:0006357|Proteome|11002423//biological process|anti-apoptosis|TAS|GO:0006916|Proteome|11002423//biological process|cel
								CG4916	-1.31	-1.65	-1.66	-1.99	2.28	0.9	-0.13	0.61	1.28	-0.63	-1.56	0.15	CG4916	maternal expression at 31B	me31B	||me31B||Me31B||ME31B||l(2)k06607||DmRH3||CG4916||	34364	2L	31B1	molecular function|nucleic acid binding|IEA|GO:0003676|Proteome|11002423//molecular function|nucleic acid binding|IEA|GO:0003676|Proteome|11002423//molecular function|ATP binding|IEA|GO:0005524|Proteome|11002423//biological process|nucleobase, nucleoside,
								CG31617	-1.23	-1.73	-1.95	-2.17	2.33	1.08	0.6	0.93	1.42	-0.28	-1.67	0.26	CG31617	His1:CG31617	His1:CG31617	||His1:CG31617||CG31617||	318854	NA	390	cellular component|nucleosome|IEA|GO:0000786|Proteome|11002423//biological process|nucleosome assembly|IEA|GO:0006334|Proteome|11002423//molecular function|DNA binding|ISS|GO:0003677|Proteome|11002423//molecular function|DNA binding|ISS|GO:0003677|Proteom
								CG6554	-0.56	-0.76	-0.71	-0.94	0.99	0.45	0.42	0.16	0.6	-0.16	-0.8	0.11	CG6554	Arginine methyltransferase 1	Art1	||Art1||DART1||CG6554||	41295	3R	86C6	biological process|histone methylation|TAS|GO:0016571|Proteome|11002423//biological process||ISS|GO:0019919|Proteome|11002423//molecular function||IDA|GO:0035241|Proteome|11002423//molecular function||IDA|GO:0035242|Proteome|11002423//molecular function|h
								CG10679	-1.34	-0.99	-1.24	-1.42	1.46	0.55	0.48	0.55	0.61	0.09	-1.18	0.11	CG10679	Nedd8	Nedd8	||CG10679||nedd8||Nedd8||	35151	2L	37B7	molecular function|protein binding|IEA|GO:0005515|Proteome|11002423//biological process|protein modification|IEA|GO:0006464|Proteome|11002423//biological process|ubiquitin-dependent protein catabolism|IEA|GO:0006511|Proteome|11002423//biological process|r
								CG7014	-1.81	-1.95	-1.65	-2.04	2.6	0.95	0.2	0.83	0.54	-0.31	-1.98	-0.04	CG7014	Ribosomal protein S5b	RpS5b	||RpS5b||CG7014||	41807	3R	88D6	molecular function|nucleic acid binding|IEA|GO:0003676|Proteome|11002423//molecular function|structural constituent of ribosome|IEA|GO:0003735|Proteome|11002423//cellular component|cytosolic small ribosomal subunit (sensu Eukarya)|NAS|GO:0005843|Proteome|
								CG1101	-1.37	-1.28	-0.96	-1.2	2.57	0.43	0.53	0.22	0.75	-0.53	-1.5	-0.19	CG1101	Aly	Aly	||l(3)02267||BcDNA:LD24793||cg1101||CG1101||ref1||REF1||Aly||dmREF1||DmREF1||	44029	3R	84B2	biological process|transcription from Pol II promoter|IEA|GO:0006366|Proteome|11002423//biological process|nucleobase, nucleoside, nucleotide and nucleic acid transport|IEA|GO:0015931|Proteome|11002423//molecular function|transcription coactivator activit
								CG4274	-1.21	-1.15	-0.79	-0.9	1.82	0.74	0.83	0.24	0.89	-0.02	-1.24	0.41	CG4274	fizzy	fzy	||Cdc20<up>Fzy</up>||Cdc20<up>fizzy</up>||cdc20/fizzy||Cdc20/Fizzy||fzy||BG:DS02740.14||CG4274||Fizzy||CDC20||Cdc20||dFZY||	34968	2L	35F8-35F9	cellular component|kinetochore|IDA|GO:0000776|Proteome|11002423//cellular component|centrosome|TAS|GO:0005813|Proteome|11002423//cellular component|spindle|IDA|GO:0005819|Proteome|11002423//biological process|cyclin catabolism|IDA|GO:0008054|Proteome|1100
								CG1622	-0.65	-0.74	-0.59	-0.61	1.14	0.39	0.09	0.34	0.56	-0.17	-0.93	0.26	CG1622	CG1622	CG1622	NA	32282	X	11000000000	NA
								CG4454	-1.7	-1.18	-1.28	-0.95	2.58	0.78	0.53	0.49	1	-0.23	-1.82	0.49	CG4454	Borealin-related	Borr	||CG4454||Bor||Borealin||Borr||dBor||	34245	2L	30A6	biological process|cytokinesis|NAS|GO:0000910|Proteome|11002423//biological process|mitosis|IMP|GO:0007067|Proteome|11002423//
								CG4494	-1.93	-1.33	-1.9	-1.1	2.52	0.75	0.79	0.69	0.95	-0.53	-1.31	0.35	CG4494	smt3	smt3	||l(2)04493||DmSUMO-1||sumo||SUMO||anon-EST:Posey240||smt3||Smt3||SMT3||DmSmt3||Dmsmt3||Dm0342||dSmt3||CG4494||	33981	2L	27C7	biological process|anti-apoptosis|TAS|GO:0006916|Proteome|11002423//biological process|chromosome segregation|IEA|GO:0007059|Proteome|11002423//biological process|mitosis|IMP|GO:0007067|Proteome|11002423//biological process|protein modification|IEA|GO:000
								CG16901	-1.38	-0.72	-0.79	-0.77	1.33	0.39	0.22	0.55	0.47	-0.45	-0.96	-0.14	CG16901	squid	sqd	||rrm3||RRM3||Squid||sqd||l(3)j6E3||CG16901||Hrb87||hrp40||Hrp40||HRP40||l(3)EP3631||CG17791||Hrb87Fb||hnRNP 1||Rbp3||heterogeneous-nuclear-ribonucleoprotein-87Fb||fs(3)00048||RNA-binding protein 3||	41666	3R	87F5-87F6	cellular component|nucleolus|ISS|GO:0005730|Proteome|11002423//cellular component|nucleus|IEA|GO:0005634|Proteome|11002423//cellular component|chromatin|NAS|GO:0000785|Proteome|11002423//cellular component|nucleus|IEA|GO:0005634|Proteome|11002423//cellula
								CG9704	-1.86	-1.6	-1.18	-1.54	2.11	0.8	0.31	0.28	0.95	-0.47	-1.95	-0.12	CG9704	Neurotactin	Nrt	||l(3)73Be||nrt||Nrt||dab||Dab||DAB||disabled||neu||BP106||MabBP106||BcDNA:LD22004||Neur||Neurotactin||Nrt BP106||CG9704||	39873	3L	73C4	cellular component|plasma membrane|ISS|GO:0005886|Proteome|11002423//molecular function|catalytic activity|IEA|GO:0003824|Proteome|11002423//biological process|cell adhesion|NAS|GO:0007155|Proteome|11002423//biological process|ectoderm development|IEA|GO:
								CG6720	-1.95	-1.55	-1.49	-1.37	1.73	0.88	0.53	0.78	0.89	-0.81	-1.16	0.27	CG6720	Ubiquitin conjugating enzyme 2	UbcD2	||ubcD2||UbcD2||CG6720||l(2)k13206||	34487	2L	32A5	molecular function|ligase activity|IEA|GO:0016874|Proteome|11002423//biological process|protein metabolism|IEA|GO:0019538|Proteome|11002423//molecular function|ubiquitin conjugating enzyme activity|NAS|GO:0004840|Proteome|11002423//molecular function|ubiq
								CG7269	-2.34	-1.81	-1.84	-1.87	2.46	1.21	0.59	0.32	0.93	-1.17	-1.91	0.19	CG7269	Helicase at 25E	Hel25E	||CG7269||Dbp25F||l(2)gdh12||Hel25E||l(2)jf26||lethal(2)25Eb||uap56||UAP56||l(2)gdh-12||l(2)k11511||jf26||hel||Hel||HEL||Wm6||WM6||l(2)25Eb||helicase||DmRH4||RNA helicase||	33781	2L	25000000	cellular component|nucleus|IEA|GO:0005634|Proteome|11002423//cellular component|nucleus|IEA|GO:0005634|Proteome|11002423//molecular function|ATP binding|IEA|GO:0005524|Proteome|11002423//cellular component|spliceosome complex|NAS|GO:0005681|Proteome|11002
								CG15408	-0.91	-0.76	-0.68	-1.31	1.8	0.27	0.48	0.38	0.52	-0.1	-0.74	0.1	CG15408	CG15408	CG15408	||CG15408||	33548	NA	230000	biological process|carbohydrate metabolism|IEA|GO:0005975|Proteome|11002423//biological process|carbohydrate transport|IEA|GO:0008643|Proteome|11002423//cellular component|membrane|IEA|GO:0016020|Proteome|11002423//cellular component|integral to membrane|
								CG5809	-0.66	-0.88	-0.52	-1.1	1.26	0.33	0.48	0.25	0.61	-0.13	-0.55	0.08	CG5809	CaBP1	CaBP1	||DmCaBP1||CG5809||BG:DS09218.4||AAL28897||CaBP1||	34976	2L	35F12	molecular function|protein disulfide isomerase activity|ISS|GO:0003756|Proteome|11002423//molecular function|electron transporter activity|IEA|GO:0005489|Proteome|11002423//biological process|electron transport|IEA|GO:0006118|Proteome|11002423//biological
								CG8409	-1.92	-1.89	-1.23	-2.17	2.88	0.75	0.91	0.49	1.1	-0.65	-1.42	0.11	CG8409	Suppressor of variegation 205	Su(var)205	||Su(var)||HP1&agr;||Suvar2-5||Su(var)2-05||Su(var)<up>205</up>||DmHP-1||Suvar(2)5||Hp1||HP1||HP1a||HP1A||E(var)29||E(var)29A||dHP1||Su(var)29A||heterochromatin-binding protein||Su-var(2)5||Su(var)2-5||Su(Var)2-5||HP-1||Su(var)2-501||C1A9-nuclear-antigen|	34119	2L	28F1-28F2	cellular component|polytene chromosome chromocenter|TAS|GO:0005701|Proteome|11002423//cellular component|polytene chromosome puff|IDA|GO:0005703|Proteome|11002423//cellular component|nuclear heterochromatin|IDA|GO:0005720|Proteome|11002423//cellular compo
								CG9745	-2.28	-2.16	-2.05	-2.42	3.45	0.81	0.89	0.84	1.21	-0.3	-1.52	0.01	CG9745	D1 chromosomal protein	D1	||dD1||Chromosomal protein D1||RE69409||CG9745||D1||EP(3)0473||	41095	3R	85D1	biological process|regulation of transcription, DNA-dependent|ISS|GO:0006355|Proteome|11002423//molecular function|AT DNA binding|IDA|GO:0003680|Proteome|11002423//molecular function|double-stranded DNA binding|IDA|GO:0003690|Proteome|11002423//molecular
								CG6143	-1.59	-1.14	-1.27	-1.18	2.04	0.88	0.9	0.19	0.59	-0.29	-1.36	0.16	CG6143	Protein on ecdysone puffs	Pep	||X4/PEP||PEP/X4||CG6143||74F gene||p100||Pep||PEP||	45961	3L	74F1	molecular function|DNA binding|ISS|GO:0003677|Proteome|11002423//molecular function|single-stranded DNA binding|NAS|GO:0003697|Proteome|11002423//molecular function|single-stranded RNA binding|NAS|GO:0003727|Proteome|11002423//cellular component|polytene
								CG9999	-1.38	-1.29	-0.94	-1.02	1.75	0.78	0.95	0.29	0.87	-0.46	-1.05	0.04	CG9999	Ran GTPase activating protein	RanGap	||Scl||Sd||SD||Segregation distorter||RanGAP||RanGap||ranGAP||rangap||dRanGAP||CG9999||CT28175||	35223	2L	370	molecular function|Ran GTPase activator activity|NAS|GO:0005098|Proteome|11002423//biological process|signal transduction|IEA|GO:0007165|Proteome|11002423//molecular function|Ran GTPase activator activity|NAS|GO:0005098|Proteome|11002423//molecular functi
								CG1440	-1.12	-0.76	-0.53	-0.77	1.53	0.64	0.49	0.18	0.49	-0.24	-0.81	0.23	CG1440	CG1440	CG1440	||CG1440||	31776	X	7000000000	biological process|proteolysis and peptidolysis|NAS|GO:0006508|Proteome|11002423//biological process|proteolysis and peptidolysis|NAS|GO:0006508|Proteome|11002423//molecular function|cysteine-type endopeptidase activity|IEA|GO:0004197|Proteome|11002423//
								CG1249	-2.09	-1.35	-1.05	-1.1	2.05	0.87	0.83	0.28	0.9	-0.29	-0.88	0.1	CG1249	CG1249	CG1249	||CG1249||BcDNA:LD03002||	40781	3R	830000	cellular component|small nucleolar ribonucleoprotein complex|IEA|GO:0005732|Proteome|11002423//biological process|nuclear mRNA splicing, via spliceosome|NAS|GO:0000398|Proteome|11002423//biological process|nuclear mRNA splicing, via spliceosome|NAS|GO:000
								CG9998	-1.56	-1.02	-0.82	-0.85	1.82	0.7	0.73	0.36	0.62	-0.44	-0.84	0.02	CG9998	U2 small nuclear riboprotein auxiliary factor 50	U2af50	||DmU2AF<up>50</up>||U2af50||U2AF50||dU2AF<up>50</up>||dUTAf<up>50</up>||l(1)9-21||l(1)14Ca||dU2AF50||DU2AF50||9-21||l(1)14Cc||CG9998||U2AF||U2af||	32602	X	14B17-14B18	cellular component|nucleus|IEA|GO:0005634|Proteome|11002423//molecular function|poly-pyrimidine tract binding|NAS|GO:0008187|Proteome|11002423//biological process|regulation of alternative nuclear mRNA splicing, via spliceosome|IMP|GO:0000381|Proteome|110
								CG7744	-0.54	-0.03	-0.28	-0.16	0.01	0.04	0.75	-0.04	0.6	0.07	-0.34	0.28	CG7744	CG7744	CG7744	NA	37239	2R	56D8-56D9	NA
								CR32862	-0.52	-0.59	-0.86	-0.8	-0.53	0.42	0.91	0.81	1.43	-0.48	-2.05	0.82	CR32862
								CG5621	-0.3	-0.16	0.3	-0.11	0.53	0.08	0.4	1.31	-0.63	-0.94	-0.34	0.06	CG5621	CG5621	CG5621	||CG5621||CT17756||anon-WO0138359.5||	42476	3R	93A2-93A3	molecular function|glutamate-gated ion channel activity|IEA|GO:0005234|Proteome|11002423//molecular function|potassium channel activity|ISS|GO:0005267|Proteome|11002423//cellular component|plasma membrane|ISS|GO:0005886|Proteome|11002423//biological proce
								CG4264	0.11	-0.02	0.4	0.21	0.79	0.24	-0.06	0.12	0.12	-0.33	-0.42	0.34	CG4264	Heat shock protein cognate 4	Hsc70-4	||Hsc4p||i190||hsc70||Hsc70||HSC70||l(3)j7A4||hsc70-4||Hsc70-4||E(nd)195||dhsc70||E(csp)1545||l(3)03550||heat-shock protein 70||HSC-70||HSC4||Hsc4||hsc4||l(3)L3929||anon-WO0118547.237||scd||CG4264||BAP74||scattered||bs17d06.y1||	41840	3R	880000	molecular function|ATP binding|IEA|GO:0005524|Proteome|11002423//biological process|protein folding|IEA|GO:0006457|Proteome|11002423//biological process|protein complex assembly|IEA|GO:0006461|Proteome|11002423//biological process|defense response|IEA|GO:
								CG17226	0.59	0.23	0.07	0.06	0.62	-0.14	-0.01	0.64	0.07	-0.11	-0.04	0.15	CG17226	Odorant receptor 59c	Or59c	||DOR120||59c||Or59c||59E.2||CG17226||	37716	NA	590	molecular function|odorant binding|IEA|GO:0005549|Proteome|11002423//biological process|G-protein coupled receptor protein signaling pathway|IEA|GO:0007186|Proteome|11002423//biological process|cell-cell signaling|NAS|GO:0007267|Proteome|11002423//molecul
								CG17173	0.04	0.16	-0.06	-0.02	1.37	0.31	0	0.74	0.06	-0.14	0.03	0.38	CG17173	CG17173	CG17173	||CG17173||	39609	NA	70F4-70F5	biological process|carbohydrate metabolism|IEA|GO:0005975|Proteome|11002423//biological process|protein amino acid glycosylation|NAS|GO:0006486|Proteome|11002423//cellular component|membrane|IEA|GO:0016020|Proteome|11002423//molecular function|alpha-1,3-m
								CG5634	0.33	-0.25	-0.29	0.04	2.02	0.03	-0.2	0.96	0.23	-0.27	-0.45	0.27	CG5634	distracted	dsd	||dsd||CG5634||CT17798||	43315	3R	98A10	molecular function|receptor activity|IEA|GO:0004872|Proteome|11002423//molecular function|receptor binding|IEA|GO:0005102|Proteome|11002423//molecular function|structural molecule activity|ISS|GO:0005198|Proteome|11002423//biological process|defense respo
								CG31062	0.14	0.26	0.23	0.53	-0.06	-0.1	-0.56	0.16	-0.5	-0.56	0.77	0.04	CG31062	sidestep	side	||CG13973||CG13974||downstream of eyeless||CG13975||CG12510||side||CG31062||CG13979||doe||Doe||CT33527||CT33528||	43300	3R	97F6-97F10	biological process|signal transduction|IEA|GO:0007165|Proteome|11002423//biological process|cell-cell adhesion|IEA|GO:0016337|Proteome|11002423//biological process|motor axon guidance|IMP|GO:0008045|Proteome|11002423//
								CG6588	1.43	0.34	0.42	0.21	0.12	-0.2	-0.06	-0.22	-0.14	0.13	-0.17	-0.16	CG6588	Fasciclin 1	Fas1	||fas-I||DROFAS1||fasI||FasI||fas I||Fas I||gasI||fasciclin I||Fasciclin I||CG6588||DROFASI||Fas1||DROFAS||	42025	3R	89D5-89D6	cellular component|plasma membrane|ISS|GO:0005886|Proteome|11002423//biological process|homophilic cell adhesion|TAS|GO:0007156|Proteome|11002423//biological process|neuronal cell recognition|IMP|GO:0008038|Proteome|11002423//biological process||IDA|GO:00
								CG1664	1.29	0.4	0.23	0.24	0.02	-0.08	-0.24	-0.24	-0.26	0.14	0.51	0.22	CG1664	small bristles	sbr	||l(1)9Fd||PABPr||l(1)ts||l(1)G1||sbr||locus 1||CT4634||sbt||dTap||CG1664||shorter-bristles||nuclear export factor 1||l(1)ts403||nxf1||NXF1||CG17335||DmNXF1||	43944	X	9F4-9F5	cellular component|nuclear membrane|IDA|GO:0005635|Proteome|11002423//cellular component|nucleoplasm|IDA|GO:0005654|Proteome|11002423//molecular function|mRNA binding|ISS|GO:0003729|Proteome|11002423//biological process|protein-nucleus import|ISS|GO:00066
								CG17801	1.94	0.56	0.29	0.75	0.26	-0.07	-0.45	0.05	0.05	0.67	0.4	0.17	CG17801	CG17801	CG17801	||CG17801||	42144	NA	90C5-90C6	molecular function|nucleic acid binding|IEA|GO:0003676|Proteome|11002423//cellular component|nucleus|IEA|GO:0005634|Proteome|11002423//molecular function|zinc ion binding|IEA|GO:0008270|Proteome|11002423//
								CG32676	1.17	0.26	0.19	0.2	-0.03	0.04	-0.12	0.07	0.16	0.37	0.31	0.08	CG32676	CG32676	CG32676	||CG9725||CG32676||CG9732||	32005	X	9E1-9E2	biological process||IMP|GO:0050875|Proteome|11002423//
								CG10077	1.05	1.17	0.58	0.91	-0.36	-0.25	-0.53	0.11	-0.63	-0.16	0.32	0.02	CG10077	CG10077	CG10077	||DmRH5||p90||cg10077||CG10077||BcDNA:HL01868||BcDNA:HL07910||	38756	3L	65D3-65D4	molecular function|nucleic acid binding|IEA|GO:0003676|Proteome|11002423//molecular function|nucleic acid binding|IEA|GO:0003676|Proteome|11002423//molecular function|ATP binding|IEA|GO:0005524|Proteome|11002423//biological process|nucleobase, nucleoside,
								CG6369	1.07	0.66	0.36	0.29	-0.18	-0.19	-0.25	-0.48	-0.07	-0.14	0.38	0.02	CG6369	Smg6	Smg6	||CG6369||Smg6||SMG6||	42994	3R	96B17	biological process|mRNA catabolism, nonsense-mediated|NAS|GO:0000184|Proteome|11002423//
								CG10153	1.56	1.05	0.48	0.97	0.3	-0.08	0.26	0.09	0.19	0.27	-0.12	-0.18	CG10153	CG10153	CG10153	NA	36641	NA	51C2	NA
								CG1898	1.89	2.05	1.54	0.61	0.35	-0.02	0.11	0.04	0.04	0.02	-0.05	0.21	CG1898	HBS1	HBS1	||CG1898||HBS1||	117365	3L	62B7	molecular function|translation elongation factor activity|ISS|GO:0003746|Proteome|11002423//molecular function|GTP binding|IEA|GO:0005525|Proteome|11002423//biological process|regulation of translation|TAS|GO:0006445|Proteome|11002423//molecular function|
								CG8651	1.21	1.32	1.51	0.52	-0.69	-0.31	-0.28	-0.17	-0.21	0.18	0.22	0.01	CG8651	trithorax	trx	||Rg-bx||l(3)j3A2||NR0A5||trxI and trxII||DMTRXIII||Regulator of bithorax||4720||l(3)bx<up>v</up>||4733||trx-g||l(3)s5452||l(3)j14A6||R-bx||CG8651||TRX||Trx||trx||	41737	3R	88B1	molecular function|histone lysine N-methyltransferase activity (H3-K4 specific)|TAS|GO:0042800|Proteome|11002423//biological process|histone methylation|TAS|GO:0016571|Proteome|11002423//cellular component|histone methyltransferase complex|IDA|GO:0035097|
								CG1216	1.79	1.4	0.82	1.09	-0.27	-0.05	0.25	0.38	-0.14	0.03	-0.02	0.07	CG1216	mrityu	mri	||mri||CG1216||	38028	3L	61B2	molecular function|voltage-gated potassium channel activity|IEA|GO:0005249|Proteome|11002423//molecular function|protein binding|IEA|GO:0005515|Proteome|11002423//biological process|potassium ion transport|IEA|GO:0006813|Proteome|11002423//cellular compon
								CG18801	2.28	1.68	1.14	0.88	-0.67	-0.07	-0.26	0.06	-0.7	0.02	0.57	-0.13	CG18801	NA	NA	||Ku80||KU80||DmKu80||BG:DS09217.6||CG18801||	34930	2L	35D4	molecular function|nucleic acid binding|IEA|GO:0003676|Proteome|11002423//molecular function|DNA binding|ISS|GO:0003677|Proteome|11002423//cellular component|DNA-dependent protein kinase complex|ISS|GO:0005958|Proteome|11002423//biological process|DNA rep
								CG1889	1.81	1.34	0.99	0.82	-0.41	-0.16	0	-0.2	0.05	0.07	0.19	-0.35	CG1889	CG1889	CG1889	||CG1889||	31928	X	9A3	molecular function|receptor binding|IEA|GO:0005102|Proteome|11002423//
								CG14764	1.81	0.47	0.45	1.02	-0.69	0.09	-0.17	-0.55	0.19	0	-0.15	0.57	CG14764	CG14764	CG14764	NA	35749	2R	43F4-43F6	NA
								CG16926	2.76	1.07	1.04	0.36	-1.3	-0.23	-0.29	-0.22	-1.34	-0.04	0.43	0.21	CG16926	CG16926	CG16926	NA	50205	2R	56D14	NA
								CG17298	1.37	0.48	0.17	0.28	-0.53	0.35	0.04	-0.16	-0.35	-0.23	0.01	0.14	CG17298	NA	NA	NA	42529	3R	93D4	NA
								CG12766	0.11	-0.35	0.4	0.49	-0.5	0.31	-0.75	0.03	-1.49	0.7	0.9	0.33	CG12766	CG12766	CG12766	||CG12766||	38462	NA	64A1	molecular function|aldehyde reductase activity|ISS|GO:0004032|Proteome|11002423//
								CG5547	0.38	-0.12	-0.02	0.18	-0.54	-0.48	-0.23	-0.39	-0.06	0.13	0.64	0.28	CG5547
								CG2269	0.44	-0.15	-0.65	-0.04	-0.35	-0.41	-0.76	-0.07	-0.66	1.02	1.08	0.21	CG2269	CG2269	CG2269	NA	36056	2R	460000	NA
								CG14566	0.56	0.64	-1.58	0.22	-1.25	-0.75	-0.63	-0.21	-0.62	0.41	1.24	0.22	CG14566	CG14566	CG14566	NA	40421	3L	78000000	NA
								CG18577	0.38	0.06	-0.43	0.25	-0.52	0.12	-0.05	-0.08	-0.36	0.27	0.62	0.19	CG18577	CG18577	CG18577	NA	41337	NA	86D7	NA
								CG32521	0.55	0.18	0.38	0.04	-0.67	0.14	0.08	0.1	-0.1	0.43	0.73	0.25	CG32521	CG32521	CG32521	NA	33098	X	19F2-19F3	NA
								CG1633	1.47	0.41	1.18	0.07	-0.79	0.41	-1.27	0.27	0.8	0.07	0.45	0.93	CG1633	thioredoxin peroxidase 1	Jafrac1	||Prx4783||thioredoxin peroxidase||Thioredoxin peroxidase 1||DPx4783||T20||Peroxiredoxin 4783||CG1633||Jafrac1||DmTPx-1||SSP5111||DPx-4783||	53578	X	1100000000000	molecular function|glutathione peroxidase activity|ISS|GO:0004602|Proteome|11002423//cellular component|cytosol|NAS|GO:0005829|Proteome|11002423//molecular function|thioredoxin peroxidase activity|ISS|GO:0008379|Proteome|11002423//molecular function|thior
								CG1214	0.66	0.27	1.05	-0.36	-0.08	0.04	-0.5	-0.04	-0.16	0.51	0.29	0.32	CG1214	roughoid	ru	||Rho-related [62A1]||rho-3||Rho-3||CG1214||roughoid/rhomboid-3||rhomboid-3||rho3||ru||Rhomboid 3||	44856	3L	62A1	molecular function|receptor signaling protein activity|IEA|GO:0005057|Proteome|11002423//molecular function|receptor binding|IEA|GO:0005102|Proteome|11002423//biological process|female gamete generation|IEA|GO:0007292|Proteome|11002423//biological process
								CG5310	0.62	0.12	1.23	-0.04	-0.11	0.3	-0.73	-0.27	0.26	0.21	0.93	0.65	CG5310	nmdyn-D6	nmdyn-D6	||CG5310||nmdyn-D6||	32396	X	12F1	molecular function|ATP binding|IEA|GO:0005524|Proteome|11002423//biological process|purine base metabolism|IEA|GO:0006144|Proteome|11002423//biological process|GTP biosynthesis|IEA|GO:0006183|Proteome|11002423//biological process|pyrimidine base metabolis
								CG14693	0.32	0.06	0.2	0.2	-0.19	0.19	-0.11	-0.36	-0.01	0.26	0.78	0.08	CG14693	CG14693	CG14693	NA	41299	3R	86C6-86C7	NA
								CG12813	-0.09	-0.06	0.67	-0.21	-0.15	0.25	-0.66	-0.02	-0.38	1.81	1.39	-0.34	CG12813	CG12813	CG12813	NA	41232	3R	85F8	NA
								CG12045	0.25	-0.19	0.35	0.22	-0.49	-0.26	-0.23	-0.21	-0.4	1.05	0.82	-0.13	CG12045	CG12045	CG12045	||CG12045||	43657	3R	100A6	molecular function||IEA|GO:0042302|Proteome|11002423//
								CG18548	-0.09	0.36	0.88	0.66	-0.81	0.12	-0.56	0.01	-0.37	1.48	1.82	0.85	CG18548	Glutathione S transferase D10	GstD10	||CG17392||GstD10||DmGSTD10||CG18548||	59240	3R	87B8	molecular function|glutathione transferase activity|NAS|GO:0004364|Proteome|11002423//biological process|defense response|IEA|GO:0006952|Proteome|11002423//biological process|response to toxin|IEA|GO:0009636|Proteome|11002423//molecular function|glutathio
								CG7567	0.36	-0.1	0.59	0.31	-1.48	-0.03	-1.08	-0.06	-0.39	1.51	1.88	0.53	CG7567	CG7567	CG7567	NA	43479	3R	99B4	NA
								CG32198	0.27	-0.14	0.09	0.58	-0.78	-0.04	-0.93	-0.15	-0.37	0.65	1.26	-0.52	CG32198	CG32198	CG32198	||CG32198||	317909	3L	75D1	biological process|biological_process unknown|ND|GO:0000004|Proteome|11002423//molecular function|molecular_function unknown|ND|GO:0005554|Proteome|11002423//cellular component|cellular_component unknown|ND|GO:0008372|Proteome|11002423//
								CG33281	0.33	-0.14	0.12	0.38	-0.06	0.1	-0.22	0.13	-0.08	0.79	1.11	0.2	CG33281	NA	NA	NA	192347	NA	NA	NA
								CG4250	0.37	-0.27	0.21	0.25	-0.14	-0.05	-0.27	0.15	-0.07	0.42	0.8	-0.27	CG4250	CG4250	CG4250	NA	37599	2R	58F4	NA
								CG17530	0.84	0.16	0.66	0.8	-0.7	0.05	-1.48	-0.13	-0.64	0.45	0.98	-0.04	CG17530	Glutathione S transferase E6	GstE6	||GstE6||DmGSTE6||CG17530||CT38747||	261578	NA	55C7	biological process|oxygen and reactive oxygen species metabolism|NAS|GO:0006800|Proteome|11002423//biological process|defense response|IEA|GO:0006952|Proteome|11002423//biological process|response to toxin|IEA|GO:0009636|Proteome|11002423//molecular funct
								CG4600	0.46	0.43	-0.14	0.3	-0.47	0.3	-0.66	-0.03	0.12	0.43	0.59	0.16	CG4600	yippee interacting protein 2	yip2	||yip2||Yip2||CG4600||	34313	2L	300000	molecular function|acetyl-CoA C-acyltransferase activity|ISS|GO:0003988|Proteome|11002423//molecular function|acetyl-CoA C-acyltransferase activity|ISS|GO:0003988|Proteome|11002423//molecular function|acetyl-CoA C-acyltransferase activity|ISS|GO:0003988|P
								CG9672	1.78	0.09	0.61	0.68	-0.22	-0.29	-1.03	0.02	-0.41	1.57	1.86	1.34	CG9672	CG9672	CG9672	||CG9672||SPH161||BcDNA:GH16384||	32651	X	15A3	molecular function|serine-type endopeptidase activity|ISS|GO:0004252|Proteome|11002423//molecular function|chymotrypsin activity|NAS|GO:0004263|Proteome|11002423//molecular function|trypsin activity|IEA|GO:0004295|Proteome|11002423//biological process|pro
								CG32626	1.21	0.01	0.34	0.3	-0.14	0.45	-0.68	0.05	0.01	0.43	0.85	0.71	CG32626	CG32626	CG32626	||CG11058||CG32626||CG15762||CG11065||	32352	X	12C2	biological process|purine base metabolism|IEA|GO:0006144|Proteome|11002423//biological process||IEA|GO:0009168|Proteome|11002423//molecular function|AMP deaminase activity|ISS|GO:0003876|Proteome|11002423//molecular function|AMP deaminase activity|ISS|GO:
								CG31412	0.86	0.05	0.68	0.38	-0.05	-0.03	-0.66	0.26	-0.28	0.33	0.78	0.64	CG31412	CG31412	CG31412	||CG12949||CG31412||SP12||c-SP12||	318719	NA	85000000	molecular function|trypsin activity|IEA|GO:0004295|Proteome|11002423//biological process|proteolysis and peptidolysis|NAS|GO:0006508|Proteome|11002423//molecular function|serine-type endopeptidase activity|ISS|GO:0004252|Proteome|11002423//
								CG4241	0.37	0.13	0.6	0.43	0.04	0.23	-0.53	0.02	-0.11	0.27	0.48	0.61	CG4241	alternative testis transcripts open reading frame A	att-ORFA	||alternative testis transcripts||att||CG4241||att-ORFA||	NA	3R	NA	molecular function|binding|TAS|GO:0005488|Proteome|11002423//cellular component|mitochondrial inner membrane|ISS|GO:0005743|Proteome|11002423//biological process|transport|IEA|GO:0006810|Proteome|11002423//molecular function|carrier activity|IEA|GO:000538
								CG32473	0.51	0.07	0.38	-0.15	-0.3	0.34	-0.71	-0.21	-0.12	0.77	0.76	0.42	CG32473	CG32473	CG32473	||GM08240p||CG11688||CG8775||CG32473||	41636	3R	8700000	molecular function|nucleic acid binding|IEA|GO:0003676|Proteome|11002423//molecular function|membrane alanyl aminopeptidase activity|IEA|GO:0004179|Proteome|11002423//molecular function|endonuclease activity|IDA|GO:0004519|Proteome|11002423//biological pr
								CG17734	0.78	0.3	0.09	0.11	-0.53	0.05	-0.9	-0.23	0.34	0.73	0.78	0.54	CG17734	CG17734	CG17734	NA	41359	3R	86D8-86D9	NA
								CG3672	1.15	0.2	0.57	0.9	-1.13	0.07	-1.17	-0.51	0.18	1.31	1.66	1.16	CG3672	CG3672	CG3672	||CG3672||	39081	3L	67B3	molecular function||IEA|GO:0042302|Proteome|11002423//
								CG1746	0.76	0.02	0.52	0.1	-0.62	-0.38	-0.76	0.01	-0.02	-0.08	-0.03	-0.34	CG1746	CG1746	CG1746	||CG1746||anon-EST:Posey224||	43693	3R	100B7	biological process|purine base metabolism|IEA|GO:0006144|Proteome|11002423//biological process||IEA|GO:0015986|Proteome|11002423//molecular function||IEA|GO:0046933|Proteome|11002423//molecular function||IEA|GO:0046961|Proteome|11002423//cellular componen
								CG17903	0.7	0.74	-0.01	0.1	-0.37	-0.59	-0.37	-0.02	-0.36	-0.07	0.06	0.01	CG17903	Cytochrome c proximal	Cyt-c-p	||cytochrome c||cytochrome C||Cytochrome c||Cytochrome C||cyt.c||pDMc01||CG17903||Cyt-c2||cyt-c2||CytC-2||Cytc||DMc01||l(2)SH1590||cytochrome c DC4||DC4||cyt-c-p||Cyt-c-p||	34996	2L	36A12	molecular function|electron transporter activity|IEA|GO:0005489|Proteome|11002423//cellular component|mitochondrion|ISS|GO:0005739|Proteome|11002423//molecular function|oxidoreductase activity|IEA|GO:0016491|Proteome|11002423//molecular function|electron
								CG11779	0.68	0.27	0.07	-0.2	-0.02	-1.02	-0.16	0.05	-0.19	-0.28	0.16	-0.42	CG11779	CG11779	CG11779	||BEST:GM03811||CG11779||BcDNA:GM03811||	42298	3R	91F6-91F7	cellular component|mitochondrial inner membrane presequence translocase complex|NAS|GO:0005744|Proteome|11002423//cellular component|mitochondrial inner membrane presequence translocase complex|NAS|GO:0005744|Proteome|11002423//biological process|protein-
								CG40127	1.3	0.55	0.12	-0.65	-1.03	-1.44	-0.94	0.01	-0.36	-0.06	-0.01	-0.5	CG40127
								CG10573	0.61	0	0.19	0.28	0.21	-0.26	0.03	-0.26	-1.73	0.35	0.16	-0.02	CG10573	knockout	ko	||ko||CG10573||	40330	3L	78B1-78B2	biological process|motor axon guidance|IMP|GO:0008045|Proteome|11002423//molecular function|molecular_function unknown|ND|GO:0005554|Proteome|11002423//cellular component|cellular_component unknown|ND|GO:0008372|Proteome|11002423//
								CG14656	1.07	0.07	0.16	0.23	-0.48	-0.06	-0.03	-0.47	-1.21	0.11	0.37	-0.03	CG14656	CG14656	CG14656	NA	40597	3R	82D6	NA
								CG13210	0.34	0.1	0.11	0.14	-0.04	-0.54	-0.53	0.31	-0.46	0.31	0.62	-0.43	CG13210	CG13210	CG13210	NA	36205	NA	470000	NA
								CG1764	0.36	0.14	0.43	0.14	0.16	-0.15	-0.09	-0.07	-0.11	0.8	0.3	-0.23	CG1764	CG1764	CG1764	||CG1764||	32281	X	11000000000	biological process|cell proliferation|IEA|GO:0008283|Proteome|11002423//molecular function|dimethylargininase activity|ISS|GO:0016403|Proteome|11002423//
								CG8360	0.35	0.24	0.54	0.15	-0.01	-0.21	0.03	-0.29	-0.31	1.09	0.28	0.21	CG8360	CG8360	CG8360	||CG8360||BcDNA:LP03131||	34122	2L	28F3	biological process|pyrimidine base metabolism|IEA|GO:0006206|Proteome|11002423//molecular function|zinc ion binding|IEA|GO:0008270|Proteome|11002423//biological process||IEA|GO:0046087|Proteome|11002423//molecular function|cytidine deaminase activity|ISS|
								CG8487	0.33	-0.27	-0.15	0.28	-0.22	0.12	-0.13	-0.2	-0.59	0.69	0.12	-0.15	CG8487	gartenzwerg	garz	||GBF1||Gartenzwerg||sec7-family GEF||garz||CG8487||CG 8487||	36337	2R	48F8-48F9	molecular function|guanyl-nucleotide exchange factor activity|IEA|GO:0005085|Proteome|11002423//biological process|intracellular protein transport|IEA|GO:0006886|Proteome|11002423//biological process|exocytosis|IEA|GO:0006887|Proteome|11002423//molecular
								CG31624	0.87	-0.03	-0.03	-0.08	-0.17	-0.35	-0.01	-0.25	-0.88	0.94	0.55	0.27	CG31624	CG31624	CG31624	||CG31624||CG17401||	35393	2L	39B1	molecular function|structural constituent of cytoskeleton|IEA|GO:0005200|Proteome|11002423//biological process|cell motility|IEA|GO:0006928|Proteome|11002423//biological process|cytoskeleton organization and biogenesis|IEA|GO:0007010|Proteome|11002423//mo
								CG12584	0.85	0.76	0.33	0.77	0.04	-0.43	-0.14	0.01	-0.48	0.91	0.14	-0.09	CG12584	CG12584	CG12584	NA	40571	NA	82C1	NA
								CG12933	0.84	0.18	0.12	0.44	-0.27	-0.08	-0.02	0	-0.45	0.99	-0.14	0.15	CG12933	CG12933	CG12933	||CG12933||	35976	2R	450	molecular function|small GTPase regulatory/interacting protein activity|IEA|GO:0005083|Proteome|11002423//
								CG13578	1.26	0.52	0.05	0.83	-0.02	-0.17	-0.36	-0.33	-1.81	2.11	0.18	-0.08	CG13578	CG13578	CG13578	NA	37891	NA	60C7	NA
								CG2962	0.79	0.95	0.98	0.86	-1.49	-1.36	-0.78	-0.68	-1.45	0.96	-0.23	-1.59	CG2962	CG2962	CG2962	NA	31952	X	9B4	NA
								CG13047	0.42	1.13	-0.38	0.2	-0.95	-1.92	-0.82	0.34	-1.47	0.52	-0.35	-1.51	CG13047	CG13047	CG13047	NA	39790	3L	72D12	NA
								CG1869	0.57	0.76	-0.06	0.18	-0.51	-1.57	-0.83	-0.11	-2.87	0.83	-0.01	-1.56	CG1869	CG1869	CG1869	||CG1869||	38370	3L	63B1	cellular component|extracellular|ISS|GO:0005576|Proteome|11002423//biological process|polysaccharide metabolism|IEA|GO:0005976|Proteome|11002423//biological process|chitin metabolism|IEA|GO:0006030|Proteome|11002423//molecular function|chitin binding|IEA|
								CG1157	1.13	0.63	0.16	0.28	-1.06	-2.63	-1.73	-0.27	-2	0.62	-0.21	-2.5	CG1157	Osiris 15	Osi15	NA	40771	3R	8300	NA
								CG10585	0.96	0.93	0.72	-0.37	-1.67	-2.06	-0.97	-0.22	-1.83	0.44	0.19	-0.93	CG10585	CG10585	CG10585	||CG10585||	40323	NA	78A5	molecular function|trans-hexaprenyltranstransferase activity|ISS|GO:0000010|Proteome|11002423//
								CG2520	0.86	0.7	0.51	-0.11	-1.21	-1.92	-1.2	-0.29	-1.43	0.27	0.26	-1.28	CG2520	like-AP180	lap	||sig||CG2520||saisoog||dAP-3||lap/AP180||l(3)neo34||AP180||BcDNA:GM10787||LAP||Lap||lap||complementation group 12||	40863	3R	84D1-84D2	cellular component|coated pit|IDA|GO:0005905|Proteome|11002423//biological process|receptor mediated endocytosis|IEA|GO:0006898|Proteome|11002423//biological process|intracellular protein transport|IEA|GO:0006886|Proteome|11002423//biological process|rece
								CG9358	-0.09	0.73	0.48	0.39	-1.04	-1.82	-0.97	-0.13	-1.59	0.54	0	-1.64	CG9358	NA	NA	||BcDNA:RE09339||Phk-3||CG9358||	37997	2R	600000000000	molecular function|carrier activity|IEA|GO:0005386|Proteome|11002423//biological process|sensory perception|IEA|GO:0007600|Proteome|11002423//biological process|response to bacteria|IEP|GO:0009617|Proteome|11002423//biological process|metamorphosis (sensu
								CG13159	1.17	1.93	0.86	1.21	-1.65	-2.65	-1.72	0.03	-2.1	0.67	-0.51	-2.26	CG13159	CG13159	CG13159	NA	36344	2R	49A1	NA
								CG9747	1.18	0.93	0.43	0.28	-1.13	-2.38	-1.72	-0.56	-3.25	0.98	0.41	-2.37	CG9747	CG9747	CG9747	||CG9747||	43591	3R	99E1-99E2	molecular function|stearoyl-CoA 9-desaturase activity|ISS|GO:0004768|Proteome|11002423//molecular function|iron ion binding|IEA|GO:0005506|Proteome|11002423//cellular component|endoplasmic reticulum|TAS|GO:0005783|Proteome|11002423//biological process|fat
								CG15212	0.93	1.53	0.68	0.49	-1.67	-3.06	-1.47	-0.1	-4.01	0.81	0.1	-2.36	CG15212	CG15212	CG15212	NA	50315	3L	64C6	NA
								CG7675	1.31	1.35	0.33	0.56	-1.37	-2.52	-1.89	-0.17	-3.12	0.33	0.2	-2.01	CG7675	CG7675	CG7675	||CG7675||	42211	3R	91A4	biological process|metabolism|IEA|GO:0008152|Proteome|11002423//molecular function|oxidoreductase activity, acting on CH-OH group of donors|IEA|GO:0016614|Proteome|11002423//
								CG30413	1.14	1.76	1.02	0.78	-2.29	-2.08	-1.92	-0.45	-3.1	0.79	0.3	-1.74	CG30413	CG30413	CG30413	||CG30413||	246601	2R	59D6	biological process|biological_process unknown|ND|GO:0000004|Proteome|11002423//molecular function|molecular_function unknown|ND|GO:0005554|Proteome|11002423//cellular component|cellular_component unknown|ND|GO:0008372|Proteome|11002423//
								CG3244	1.14	1.56	0.2	0.91	-1.81	-2.83	-1.49	-0.53	-3.32	0.9	0.38	-1.92	CG3244	CG3244	CG3244	||CG3244||	33678	2L	25A6	molecular function|sugar binding|IEA|GO:0005529|Proteome|11002423//
								CG14243	1.12	1.3	0.39	1	-1.89	-2.65	-1.63	-0.27	-2.48	0.87	0.14	-2.27	CG14243	CG14243	CG14243	NA	43210	3R	97C3	NA
								CG8640	1.1	1.61	0.52	0.73	-2.43	-2.71	-1.61	-0.35	-3.03	0.98	0.09	-2.34	CG8640	CG8640	CG8640	||CG8640||	38773	3L	65000	molecular function|structural constituent of cuticle (sensu Insecta)|ISS|GO:0005214|Proteome|11002423//
								CG18657	-0.04	0.24	0.28	0.09	-0.32	-0.47	0.05	-0.11	-1.4	0.18	0.59	-0.57	CG18657	Netrin-A	NetA	||netrin||Netrin||NETRIN||netrinA||Netrin A||CT27014||CG18657||NetA||netA||D-netrin-A||	32398	X	12F1-12F2	molecular function|structural molecule activity|ISS|GO:0005198|Proteome|11002423//molecular function|structural molecule activity|ISS|GO:0005198|Proteome|11002423//biological process|cell-matrix adhesion|IEA|GO:0007160|Proteome|11002423//biological proces
								CG8192	-0.21	0.18	0.38	0.21	-0.15	-0.42	-0.38	-0.15	-1.45	0.14	0.88	-0.41	CG8192	CG8192	CG8192	NA	36723	2R	52A10	NA
								CG4123	0.1	0.24	0.27	0.27	-0.01	-1.26	-0.01	-0.15	-1.69	0.82	0.76	-0.88	CG4123	Multiple inositol polyphosphate phosphatase 1	Mipp1	||CK2082||CG4123||Mipp1||	39841	3L	73A7-73A9	molecular function|acid phosphatase activity|ISS|GO:0003993|Proteome|11002423//molecular function|inositol or phosphatidylinositol phosphatase activity|ISS|GO:0004437|Proteome|11002423//molecular function|inositol or phosphatidylinositol phosphatase activ
								CG8827	0.04	0.63	0.36	0.05	-0.44	-1.36	0.38	-0.1	-1.54	0.49	0.99	-0.68	CG8827	Angiotensin converting enzyme	Ance	||anon-EST:fe3D10||CG8827||anon-fast-evolving-3D10||l(2)br31||BG:DS08220.3||Ance||AnCE||br31||ACE||Related to angiotensin converting enzyme||l34Eb||race||Race||RACE||l(2)34Eb||	34805	2L	3400	molecular function|peptidyl-dipeptidase A activity|IEA|GO:0004246|Proteome|11002423//biological process|proteolysis and peptidolysis|NAS|GO:0006508|Proteome|11002423//biological process|proteolysis and peptidolysis|NAS|GO:0006508|Proteome|11002423//cellul
								CG12564	0.08	0.36	0	-0.02	-0.77	-0.7	-1.23	-0.17	-1.88	0.51	1.29	0.06	CG12564	CG12564	CG12564	NA	33124	NA	20A1	NA
								CG17325	0	0.07	0.43	0.16	-2.93	-0.85	-1.47	-0.29	-3.59	1.04	1.4	-1.63	CG17325	CG17325	CG17325	NA	50467	2L	37A4-37A5	NA
								CG7196	0.59	0.58	0.8	0.65	-0.66	-0.35	-0.56	-0.28	0.08	0.17	0.66	0.45	CG7196	CG7196	CG7196	NA	34057	NA	28C2	NA
								CG17725	1.63	0.57	1.28	1.83	-0.93	-0.73	-0.38	-0.08	-1.67	0.62	0.75	0.35	CG17725	Phosphoenolpyruvate carboxykinase	Pepck	||CG17725||Pepck||	37131	2R	55D3	molecular function|GTP binding|IEA|GO:0005525|Proteome|11002423//molecular function|phosphoenolpyruvate carboxykinase (GTP) activity|ISS|GO:0004613|Proteome|11002423//molecular function|phosphoenolpyruvate carboxykinase (GTP) activity|ISS|GO:0004613|Prote
								CG1737	0.92	0.5	0.23	0.89	-0.69	-0.24	-0.11	-0.64	-0.26	0.36	0.35	0.19	CG1737	CG1737	CG1737	NA	32077	X	10B3-10B4	NA
								CG30422	0.37	0.44	0.2	1.09	-0.64	-0.03	-0.2	-0.24	-0.36	0.26	0.85	0.1	CG30422	CG30422	CG30422	NA	37962	2R	600	NA
								CG9159	1.23	0.5	0.29	0.17	-0.87	0.17	-1.08	-0.11	-1.04	0.09	0.35	-0.23	CG9159	Kruppel homolog 2	Kr-h2	||Kruppel homolog||Kr-h||CG9159||Kr-h2||	33859	2L	26B7-26B8	cellular component|integral to membrane|NAS|GO:0016021|Proteome|11002423//
								CG10960	1.56	0.48	0.27	0.36	-0.63	-0.88	-1.28	-0.11	-0.76	-0.32	1.08	-0.06	CG10960	CG10960	CG10960	||CT30701||CG10960||	39458	3L	69E5-69E6	molecular function|sugar porter activity|IEA|GO:0005351|Proteome|11002423//biological process|carbohydrate metabolism|IEA|GO:0005975|Proteome|11002423//biological process|carbohydrate transport|IEA|GO:0008643|Proteome|11002423//biological process|carbohyd
								CG4162	0.64	0.2	-0.04	0	-0.21	-0.15	-0.5	-0.2	-0.13	0.04	0.31	-0.09	CG4162	lace	lace	||anon-EST:Posey289||Serine palmitoyltransferase subunit II||l35Dc||l(2)br36||lace||br36||BG:DS01845.3||SPT-II||l(2)35Dc||CG4162||	34910	2L	35D2	biological process|lipid metabolism|IEA|GO:0006629|Proteome|11002423//molecular function|transaminase activity|IEA|GO:0008483|Proteome|11002423//molecular function|transaminase activity|IEA|GO:0008483|Proteome|11002423//biological process||IEA|GO:0009058|
								CG15304	0.59	0.28	0.55	-0.08	-0.09	-0.56	0.02	0.09	-0.53	0.53	0.24	-0.13	CG15304	NA	NA	NA	192347	NA	NA	NA
								CG5804	3.3	1.39	1.99	0.64	0.21	-1.08	-0.87	0.17	-1.74	1.89	1.58	0.5	CG5804	CG5804	CG5804	||CG5804||BcDNA:RE05521||	39005	3L	660	molecular function|carrier activity|IEA|GO:0005386|Proteome|11002423//biological process|lipid transport|IEA|GO:0006869|Proteome|11002423//molecular function|acyl-CoA binding|TAS|GO:0000062|Proteome|11002423//molecular function|enzyme inhibitor activity|I
								CG10531	2.36	-0.04	-0.04	0.36	-0.39	-0.52	-1.02	-0.07	-0.59	1.09	1.53	0.17	CG10531	CG10531	CG10531	||CG10531||	37392	2R	57B16	biological process|polysaccharide metabolism|IEA|GO:0005976|Proteome|11002423//biological process|signal transduction|IEA|GO:0007165|Proteome|11002423//biological process|cell-cell signaling|NAS|GO:0007267|Proteome|11002423//molecular function|growth fact
								CG6295	1.23	0.32	0.12	-0.24	-0.4	-0.33	-0.51	0.13	-0.74	0.64	1.11	0.46	CG6295	CG6295	CG6295	||CG6295||	43247	3R	97D13	biological process|lipid metabolism|IEA|GO:0006629|Proteome|11002423//biological process|lipid metabolism|IEA|GO:0006629|Proteome|11002423//molecular function|phospholipase A1 activity|ISS|GO:0008970|Proteome|11002423//molecular function|triacylglycerol l
								CG3989	0.69	-0.47	0.06	0.14	-0.38	-0.84	-0.88	-0.01	-0.99	0.59	0.83	0.29	CG3989	ade5	ade5	||AIRc-SAICARs||AIR-carboxylase-SAICAR synthetase||CG3989||ade5||Ade5||	32228	X	11B16	biological process|purine base metabolism|IEA|GO:0006144|Proteome|11002423//biological process|purine nucleotide biosynthesis|NAS|GO:0006164|Proteome|11002423//biological process|'de novo' IMP biosynthesis|ISS|GO:0006189|Proteome|11002423//cellular compon
								CG6022	0.73	-0.19	-0.11	0.2	-0.19	-0.56	-0.21	-0.13	-0.47	0.51	0.63	-0.03	CG6022	CG6022	CG6022	||CG6022||	42590	3R	94A1	biological process|coenzyme metabolism|IEA|GO:0006732|Proteome|11002423//molecular function|holocytochrome-c synthase activity|ISS|GO:0004408|Proteome|11002423//molecular function|holocytochrome-c synthase activity|ISS|GO:0004408|Proteome|11002423//cellul
								CG3456	0.11	0.3	0.18	0.01	-0.21	-0.13	-0.32	0.23	-0.69	0.3	0.98	0.16	CG3456	Monocarboxylate transporter 1	Mct1	||EG:103B4.3||CG3456||Mct1||	31198	X	200	biological process|cation transport|IEA|GO:0006812|Proteome|11002423//cellular component|integral to membrane|NAS|GO:0016021|Proteome|11002423//molecular function|monocarboxylic acid transporter activity|ISS|GO:0008028|Proteome|11002423//molecular functio
								CG17522	0.39	0.28	0.3	0	-0.1	0.05	-0.46	0.05	-0.24	0.14	0.85	0.15	CG17522	Glutathione S transferase E10	GstE10	||CG17522||GstE10||DmGSTE10||	261583	NA	55C6	biological process|defense response|IEA|GO:0006952|Proteome|11002423//biological process|response to toxin|IEA|GO:0009636|Proteome|11002423//molecular function|glutathione transferase activity|NAS|GO:0004364|Proteome|11002423//
								CG3724	0.5	0.07	-0.01	0.1	0	-0.23	-0.51	0.21	-0.25	0.45	1.08	0.23	CG3724	Phosphogluconate dehydrogenase	Pgd	||l(1)N3<up>90</up>||l(1)G0385||l(1)A7||l(1)2Dc||6-phosphogluconate dehydrogenase||l(1)Pgd||l(1)2De||EG:87B1.4||NADP-6 phosphogluconate dehydrogenase||l(1)N1||6PGD||6Pgd||l35||l(1)Pgd-A||A7||6Pgdh||6PGDH||CG3724||Pgd||PGD||Pdg||6-pgd||6-Pgd||6-PGD||N1||	31185	X	2D4	molecular function|phosphogluconate dehydrogenase (decarboxylating) activity|TAS|GO:0004616|Proteome|11002423//biological process|pentose-phosphate shunt|NAS|GO:0006098|Proteome|11002423//molecular function|phosphogluconate dehydrogenase (decarboxylating)
								CG2262	0.43	0.74	0.13	0.39	-0.7	-0.42	-0.46	-0.16	-0.34	0.22	0.24	0.26	CG2262	Smad on X	Smox	||l(1)G0348||smox||Smox||tmp||temporarily deranged||CG2262||SMAD2||Smad2||smad2||sisters against dpp||Sisters against dpp||sad||Sad||dSmad2||dSMAD2||DSMAD2||ted||	31738	X	7D14-7D15	cellular component|intracellular|IEA|GO:0005622|Proteome|11002423//biological process|regulation of transcription from Pol II promoter|IEA|GO:0006357|Proteome|11002423//biological process|transmembrane receptor protein serine/threonine kinase signaling pa
								CG14996	1.52	0.14	0.54	0.83	-0.65	-1.17	-1.03	-0.13	-0.51	-0.08	0.3	-0.3	CG14996	Chd64	Chd64	||clone 1.80||Chd64||CT34849||anon-EST:Liang-1.80||CG14996||	38490	3L	64A6-64A7	molecular function|structural constituent of cytoskeleton|IEA|GO:0005200|Proteome|11002423//biological process|muscle contraction|IEA|GO:0006936|Proteome|11002423//molecular function|actin binding|NAS|GO:0003779|Proteome|11002423//cellular component|stria
								CG18648	1	0.42	0.86	1.01	-1.2	-1	-0.9	-0.15	-0.52	-0.15	0.55	-0.04	CG18648	NA	NA	NA	192347	NA	NA	NA
								CG8697	1.35	1.41	1.28	1.02	-1.3	-1.47	-1.05	-0.02	-0.76	0.02	0.8	0.08	CG8697	Larval cuticle protein 2	Lcp2	||CG8697||Lcp2||LCP2||Gene II||II||2||CP2||LCP-2||cuticle p. II-||L<down>3</down>CP2||	35818	2R	44C6	molecular function|structural constituent of larval cuticle (sensu Insecta)|NAS|GO:0008010|Proteome|11002423//molecular function|structural constituent of larval cuticle (sensu Insecta)|NAS|GO:0008010|Proteome|11002423//
								CG17533	1.32	0.44	-0.19	0.95	-0.96	-0.37	-0.99	-0.17	-0.75	0.32	0.62	0.51	CG17533	Glutathione S transferase E8	GstE8	NA	261576	NA	55C7-55C8	NA
								CG7997	0.95	-0.05	0.35	-0.18	-0.84	-0.03	-0.72	0.08	-0.34	0.6	0.48	0.41	CG7997	CG7997	CG7997	||CG7997||CT24026||	36829	2R	53B5	biological process|polysaccharide metabolism|IEA|GO:0005976|Proteome|11002423//molecular function|alpha-galactosidase activity|ISS|GO:0004557|Proteome|11002423//
								CG5887	1.08	0.21	0.6	0	-1.09	-0.09	-0.62	-0.07	-0.01	0.23	1.12	0.43	CG5887	desat1	desat1	||BEST:SD05462||desaturase||desat||anon-WO0118547.730||desat1||CG5887||anon-WO0118547.726||Stearoyl CoA desaturase||fatty acid desaturase||Fatty acid desaturase||fad||Fad||	117369	3R	87B10-87B11	molecular function|iron ion binding|IEA|GO:0005506|Proteome|11002423//cellular component|endoplasmic reticulum|TAS|GO:0005783|Proteome|11002423//cellular component|membrane|IEA|GO:0016020|Proteome|11002423//molecular function|stearoyl-CoA 9-desaturase act
								CG7070	1.17	0.39	0.04	0.03	-1.12	0.01	-0.78	-0.21	0.2	0.09	0.71	0.48	CG7070	Pyruvate kinase	PyK	||CG7070||pyruvate kinase||Pyk||PyK||	42620	3R	94A9-94A10	cellular component|cytosol|NAS|GO:0005829|Proteome|11002423//molecular function|carbohydrate kinase activity|IEA|GO:0019200|Proteome|11002423//molecular function|pyruvate kinase activity|NAS|GO:0004743|Proteome|11002423//biological process|phosphorylation
								CG1368	1.49	0.81	0.38	0.17	-2.05	-0.3	-1.39	-0.54	-0.84	0.39	0.84	0.14	CG1368	CG1368	CG1368	||CG1368||	32361	X	1200	molecular function|structural constituent of chorion (sensu Insecta)|NAS|GO:0005213|Proteome|11002423//
								CG7107	1.18	0.59	0.16	-0.07	-1.53	-0.22	-1.54	-0.54	-0.17	0.57	1.03	0.07	CG7107	NA	NA	||indented thorax||FBgn0004169||upheld2||up||TpnT||TnT||BcDNA:LD08591||CG7107||troponin-T||dro TnT||int||troponin T||Troponin T||wupB||	32314	X	12A7	biological process|mesoderm development|NAS|GO:0007498|Proteome|11002423//molecular function|tropomyosin binding|NAS|GO:0005523|Proteome|11002423//cellular component|troponin complex|NAS|GO:0005861|Proteome|11002423//molecular function|tropomyosin binding
								CG2803	1.38	0.06	0.19	0.04	-1.45	-0.39	-0.99	0.1	-0.9	0.72	1.01	0.01	CG2803	NA	NA	NA	192347	NA	NA	NA
								CG9336	1.67	-0.28	0.26	0.37	-1.66	-0.26	-1.44	-0.47	-1.07	0.14	1.29	0.5	CG9336	CG9336	CG9336	NA	35355	2L	38F3	NA
								CG5304	0.81	0.09	0.29	-0.15	-0.9	-0.74	-1.21	-0.13	-0.47	0.42	1.2	0.55	CG5304	lethal (2) 01810	l(2)01810	||l(2)01810||CG5304||anon-WO0118547.88||	47253	2L	33B9	biological process|carbohydrate metabolism|IEA|GO:0005975|Proteome|11002423//biological process|phosphate metabolism|IEA|GO:0006796|Proteome|11002423//biological process|cation transport|IEA|GO:0006812|Proteome|11002423//biological process|phosphate trans
								CG8251	0.21	0.11	0.2	0.12	-0.58	-0.14	-0.67	-0.23	-0.07	0.23	0.61	0.23	CG8251	Phosphoglucose isomerase	Pgi	||pgi||Pgi||PGI||Gpi||GPI||CG8251||glucose phosphate isomerase||	35886	2R	44F6	molecular function|phosphogluconate dehydrogenase (decarboxylating) activity|TAS|GO:0004616|Proteome|11002423//molecular function|glucose-6-phosphate isomerase activity|NAS|GO:0004347|Proteome|11002423//cellular component|cytoplasm|IEA|GO:0005737|Proteome
								CG7007	0.6	0.45	0.2	0.39	-0.6	-0.32	-0.49	0.06	0	0.07	0.79	0.22	CG7007	VhaPPA1-1	VhaPPA1-1	||CG7007||V-ATPase||vhaPPA1-1||VhaPPA1-1||	45247	3R	88D6	biological process|cation transport|IEA|GO:0006812|Proteome|11002423//biological process||IEA|GO:0015986|Proteome|11002423//cellular component||IEA|GO:0016469|Proteome|11002423//molecular function||IEA|GO:0046933|Proteome|11002423//molecular function||IEA
								CG10347	1.42	0.84	1.52	0.36	-0.75	-0.62	-0.39	-0.36	-0.33	1.04	1.1	0.85	CG10347	CG10347	CG10347	NA	32141	X	10F1	NA
								CG4979	0.67	0.23	0.66	0.29	-0.15	0.01	-0.39	-0.03	-0.07	0.53	0.49	0.18	CG4979	sex-specific enzyme 2	sxe2	||sxe2||CG4979||	41954	3R	89B2	biological process|lipid metabolism|IEA|GO:0006629|Proteome|11002423//biological process|lipid metabolism|IEA|GO:0006629|Proteome|11002423//molecular function|phosphatidylserine-specific phospholipase A1 activity|ISS|GO:0017063|Proteome|11002423//
								CG32237	2	1.66	0.88	0.67	-1.77	0.19	-1.41	0	-0.86	0.23	1.27	0.63	CG32237	CG32237	CG32237	NA	38584	3L	64C1	NA
								CG8036	1.4	0.45	0.7	0.2	-0.63	-0.43	-0.62	-0.05	-0.09	0.14	0.73	0.75	CG8036	CG8036	CG8036	||anon-WO0118547.344||CG8036||	41027	3R	85A5	biological process|pentose-phosphate shunt|NAS|GO:0006098|Proteome|11002423//molecular function|transketolase activity|ISS|GO:0004802|Proteome|11002423//
								CG8186	2.66	1.31	0.48	0.43	-1.55	0.16	-0.86	-0.58	-0.51	0.48	0.9	0.15	CG8186	Vha36	Vha36	||anon-WO02059370.27||anon-WO0153538.28||V-ATPase||CG8186||VhaD||vha36||Vha36||anon-WO0153538.20||anon-WO0153538.21||l(2)k07207||Vacuolar H-ATPase subunit D||	44702	2R	52A10	biological process|purine base metabolism|IEA|GO:0006144|Proteome|11002423//biological process||IEA|GO:0015986|Proteome|11002423//cellular component||IEA|GO:0016469|Proteome|11002423//molecular function||IEA|GO:0046933|Proteome|11002423//molecular functio
								CG6776	2.64	1.04	0.77	0.88	-0.3	-0.9	-1.13	-0.01	-1.76	1	0.78	0.38	CG6776	CG6776	CG6776	||T14||CG6776||	38972	3L	66D5	cellular component|cytoplasm|IEA|GO:0005737|Proteome|11002423//biological process|oxygen and reactive oxygen species metabolism|NAS|GO:0006800|Proteome|11002423//biological process|defense response|IEA|GO:0006952|Proteome|11002423//biological process|resp
								CG7497	2.76	1.46	0.8	1.06	-0.4	-1.48	-1.1	-0.39	-1.29	1.17	1.25	0.27	CG7497	NA	NA	||CHED-related||BcDNA:GH27361||CG7497||anon-WO0170980.88||anon-WO0170980.89||	39966	3L	74E5-74F1	molecular function||IEA|GO:0001584|Proteome|11002423//biological process|actin filament organization|IMP|GO:0007015|Proteome|11002423//biological process|regulation of cell shape|IMP|GO:0008360|Proteome|11002423//biological process|G-protein coupled recep
								CG7368	2.51	0.8	0.64	0.53	-0.42	-0.29	-0.55	-0.27	-0.83	1.33	1.08	0.25	CG7368	CG7368	CG7368	||CG7368||	39301	NA	68C14-68C15	molecular function|nucleic acid binding|IEA|GO:0003676|Proteome|11002423//cellular component|nucleus|IEA|GO:0005634|Proteome|11002423//molecular function|zinc ion binding|IEA|GO:0008270|Proteome|11002423//
								CG9406	1.55	0.56	0.5	0.96	-0.31	-0.17	-0.39	-0.33	-0.58	0.55	0.45	0.07	CG9406	CG9406	CG9406	||CG9406||	37405	2R	57C3	molecular function|calcium ion binding|IEA|GO:0005509|Proteome|11002423//
								CG1380	1.55	0.69	0.58	0.69	-0.76	-0.46	-0.67	-0.39	-0.72	0.94	0.71	-0.09	CG1380	sugar transporter 4	sut4	||sut4||CG1380||	36055	2R	46E3-46E4	biological process|carbohydrate metabolism|IEA|GO:0005975|Proteome|11002423//biological process|carbohydrate transport|IEA|GO:0008643|Proteome|11002423//molecular function|sugar porter activity|IEA|GO:0005351|Proteome|11002423//molecular function|glucose
								CG8649	2.48	0.97	0.64	1.03	-1.04	-0.66	-0.86	-0.51	-0.66	1.17	0.86	-0.08	CG8649	Fimbrin	Fim	||Fim||CG8649||fimbrin||	32721	X	16A1	molecular function|structural constituent of cytoskeleton|IEA|GO:0005200|Proteome|11002423//molecular function|calcium ion binding|IEA|GO:0005509|Proteome|11002423//biological process|cytoskeleton organization and biogenesis|IEA|GO:0007010|Proteome|110024
								CG15191	2.03	1.36	0.96	0.81	-0.99	-0.59	-0.09	-0.28	-0.63	1.5	0.67	0.28	CG15191	enhancer of yellow 2	e(y)2	||e(y)2||CG15191||d||e(y)<up>2</up>||	45848	NA	10C7	molecular function|transcription factor activity|IEA|GO:0003700|Proteome|11002423//cellular component|nucleus|IEA|GO:0005634|Proteome|11002423//biological process|transcription|NAS|GO:0006350|Proteome|11002423//
								CG18416	0.75	0.45	0.46	0.63	-0.49	-0.22	-0.32	-0.17	-0.09	0.21	0.37	0.41	CG18416	CG18416	CG18416	NA	37279	2R	56F9	NA
								CG5010	2.98	1.83	1.64	1.83	-0.9	-0.4	-1.23	-0.25	0.06	0.6	0.85	0.83	CG5010	CG5010	CG5010	NA	32701	X	150000000	NA
								CG7197	1.53	1.13	1.25	0.4	-0.37	-0.63	-0.73	-0.12	-0.1	0.31	0.38	0.2	CG7197	CG7197	CG7197	||CG7197||	38931	NA	66C5	molecular function|GTP binding|IEA|GO:0005525|Proteome|11002423//biological process|intracellular protein transport|IEA|GO:0006886|Proteome|11002423//biological process|cell surface receptor linked signal transduction|IGI|GO:0007166|Proteome|11002423//bio
								CG1927	1.82	1.38	1.41	0.45	-0.47	-0.4	-0.67	-0.44	-0.98	0.8	0.47	0.06	CG1927	CG1927	CG1927	NA	38262	3L	62B12	NA
								CG3884	2.05	1.08	1.12	1.16	-0.89	-0.48	-0.73	-0.12	-1.22	0.92	0.92	0.61	CG3884	CG3884	CG3884	NA	36429	2R	490000	NA
								CG11051	2.59	2.27	1.17	1.21	-1.57	-0.65	-1.02	-0.1	-1.02	0.39	0.61	0.16	CG11051	Neuropeptide-like precursor 2	Nplp2	||BcDNA:RH08410||CG11051||Nplp2||NPLP2||NEF peptide||neuropeptide-like precursor 2||	50286	3L	70A6	molecular function|neuropeptide hormone activity|ISS|GO:0005184|Proteome|11002423//cellular component|extracellular|ISS|GO:0005576|Proteome|11002423//biological process|neuropeptide signaling pathway|ISS|GO:0007218|Proteome|11002423//
								CG7246	1.19	1.17	0.46	0.36	-0.73	-0.39	-0.44	-0.17	-0.61	0.47	0.42	0.17	CG7246	CG7246	CG7246	||CG7246||	31833	X	8C6-8C7	molecular function|nucleic acid binding|IEA|GO:0003676|Proteome|11002423//molecular function|damaged DNA binding|IEA|GO:0003684|Proteome|11002423//cellular component|intracellular|IEA|GO:0005622|Proteome|11002423//biological process|nucleobase, nucleoside
								CG2493	1.16	1.38	0.87	0.68	-1.13	-0.52	-0.55	-0.42	-0.57	0.35	0.54	0.12	CG2493	CG2493	CG2493	||CG2493||38C.55||	35316	2L	38C8	biological process|proteolysis and peptidolysis|NAS|GO:0006508|Proteome|11002423//biological process|proteolysis and peptidolysis|NAS|GO:0006508|Proteome|11002423//molecular function|lysosomal Pro-X carboxypeptidase activity|ISS|GO:0004188|Proteome|110024
								CG7305	1.8	1.93	1.3	0.59	-1.09	-0.99	-0.72	-0.47	-0.9	0.61	1.12	0.21	CG7305	NA	NA	NA	192347	NA	NA	NA
								CG5792	1.65	1.25	1.58	1.32	-0.66	-0.29	-0.4	-0.59	-0.64	0.83	1.04	0.6	CG5792	CG5792	CG5792	NA	34685	2L	33F3-33F4	NA
								CG7625	1.3	0.86	0.99	0.74	-0.48	-0.6	-0.71	-0.04	-0.27	0.52	0.59	0.27	CG7625	NA	NA	NA	192347	NA	NA	NA
								CG7077	1.44	1.08	1.3	1.08	-0.9	-0.65	-0.46	-0.1	-0.62	0.56	0.32	0.08	CG7077	CG7077	CG7077	||CG7077||	42614	3R	94A5	biological process|metabolism|IEA|GO:0008152|Proteome|11002423//molecular function|oxidoreductase activity, acting on the CH-OH group of donors, NAD or NADP as acceptor|ISS|GO:0016616|Proteome|11002423//
								CG18335	1.11	0.82	1.1	0.6	-0.71	-0.74	-0.45	-0.25	-0.4	0.57	0.75	0.31	CG18335	CG18335	CG18335	NA	36202	2R	47E3-47E4	NA
								CG1939	1.25	0.87	1.15	0.51	-0.71	-0.52	-0.56	-0.24	-0.3	0.27	0.44	0.18	CG1939	CG1939	CG1939	||CG1939||	40846	3R	84B4	molecular function|ATP binding|IEA|GO:0005524|Proteome|11002423//
								CG7245	1.07	0.83	1.18	0.68	-0.6	-0.5	-0.43	-0.31	-0.33	0.45	0.42	0.19	CG7245	NA	NA	NA	192347	NA	NA	NA
								CG8893	2.93	1.33	1.24	0.43	-1.85	-0.69	-1.49	-0.08	-0.22	0.16	0.67	0.1	CG8893	Glyceraldehyde 3 phosphate dehydrogenase 2	Gapdh2	||Gapdh-2||Gapdh||GAPDH||GADPH||Gapdh2||GAPDH II||CG8893||GA3PDH||G3-P dehydrogenase||Gapd||Gapdh13F||	32545	X	13F17	molecular function|glyceraldehyde-3-phosphate dehydrogenase (phosphorylating) activity|NAS|GO:0004365|Proteome|11002423//biological process|glycolysis|IEA|GO:0006096|Proteome|11002423//molecular function|glyceraldehyde-3-phosphate dehydrogenase (phosphory
								CG17332	2.32	1.04	0.83	0.49	-0.83	-1.19	-0.92	0.02	-0.37	0.22	0.4	-0.12	CG17332	Vacuolar H	VhaSFD	||V-ATPase||CG17332||vhaSFD||VhaSFD||	34997	NA	36A12	molecular function|ATP binding|IEA|GO:0005524|Proteome|11002423//biological process|cation transport|IEA|GO:0006812|Proteome|11002423//biological process||IEA|GO:0015986|Proteome|11002423//cellular component||IEA|GO:0016469|Proteome|11002423//molecular fu
								CG6213	2.39	0.92	0.84	0.72	-1.4	-1.27	-1.41	-0.14	-0.19	0.32	0.43	-0.04	CG6213	Vacuolar H	Vha13	||V-ATPase||l(3)05113||vha13||Vha13||BcDNA:AT14009||VhaG||CG6213||	42341	3R	92A11	biological process|embryonic development (sensu Insecta)|IMP|GO:0001700|Proteome|11002423//cellular component|hydrogen-transporting ATPase V1 domain|NAS|GO:0000221|Proteome|11002423//molecular function|hydrogen-exporting ATPase activity, phosphorylative m
								CG8588	1.54	0.18	0.36	0.04	-0.75	-0.05	-1.4	-0.25	-0.51	0.77	1.02	0.64	CG8588
								CG9547	0.93	0.26	0.49	0.11	-0.7	0.15	-0.68	-0.33	-0.11	0.63	0.89	0.08	CG9547	CG9547	CG9547	||CG9547||	33911	2L	26D9	biological process|electron transport|IEA|GO:0006118|Proteome|11002423//biological process|acyl-CoA metabolism|IDA|GO:0006637|Proteome|11002423//molecular function|glutaryl-CoA dehydrogenase activity|ISS|GO:0004361|Proteome|11002423//molecular function|gl
								CG32071	1.54	0.71	0.7	0.46	-0.76	-0.37	-1	-0.05	-0.31	1.3	1.9	0.28	CG32071	CG32071	CG32071	NA	39246	NA	68A6	NA
								CG2259	1.41	-0.11	0.46	0.39	-0.53	-0.26	-1.12	-0.25	-0.31	0.81	1.34	0.09	CG2259	Glutamate-cysteine ligase catalytic subunit	Gclc	||&ggr;-Glutamylcysteine synthetase catalytic subunit||Gcsh||GCSh||DmGCSh||&ggr;-Glutamylcysteine synthetase||Gclc||DmGCLC||CG2259||Gcs||DmGCS||	53581	X	7D8-7D10	molecular function|glutamate-cysteine ligase activity|ISS|GO:0004357|Proteome|11002423//biological process|glutathione biosynthesis|IEA|GO:0006750|Proteome|11002423//molecular function|nucleic acid binding|IEA|GO:0003676|Proteome|11002423//biological proc
								CG4501	1.02	0.55	0.34	0.15	-0.79	-0.11	-0.69	-0.41	-0.43	0.93	1.08	0.5	CG4501	bubblegum	bgm	||2a9hom||CG4501||BG:DS0514.2||BG:DS01514.2||bgm||	44117	NA	34F1	biological process|fatty acid metabolism|IEA|GO:0006631|Proteome|11002423//molecular function|long-chain-fatty-acid-CoA ligase activity|ISS|GO:0004467|Proteome|11002423//molecular function|long-chain-fatty-acid-CoA ligase activity|ISS|GO:0004467|Proteome|
								CG11992	0.83	0.05	0.2	0.27	-0.43	-0.1	-0.46	-0.09	-0.33	0.67	0.79	0.42	CG11992	Relish	Rel	||CG11992||immune response deficient 4||rel||Rel||REL||l(3)neo36||ird4||relish||ird||	41087	NA	85C3	cellular component|nucleus|IEA|GO:0005634|Proteome|11002423//cellular component|cytoplasm|IEA|GO:0005737|Proteome|11002423//biological process|regulation of transcription from Pol II promoter|IEA|GO:0006357|Proteome|11002423//biological process|cellular d
								CG15254	1.71	0.11	0.43	0.26	-0.97	-0.03	-1.03	-0.38	-0.67	1.09	1.8	0.59	CG15254	CG15254	CG15254	||CG15254||BG:BACR44L22.2||BACcr44L22.2||	34915	NA	35D3	biological process|proteolysis and peptidolysis|NAS|GO:0006508|Proteome|11002423//biological process|proteolysis and peptidolysis|NAS|GO:0006508|Proteome|11002423//molecular function|zinc ion binding|IEA|GO:0008270|Proteome|11002423//molecular function||I
								CG10045	2.43	1.28	1.81	0.97	-1.75	-0.38	-1.66	0.05	-0.24	0.4	1.42	0.73	CG10045	Glutathione S transferase D1	GstD1	||gstD1||GstD1||GSTD1||CG10045||CG10045 Glutathione S-transferase||GSTase||G-S-T||T5||GST-1||gst-D1-1||Gst||GST||DmGST1||DmGst1||DmGSTD1-1||Glutathione S-transferase 1||DmGSTD1||DmGST-1||GST1-1||GSt1-1||Gst1-1||Gst1.1||GST1||Gst1||	41503	3R	87B8	molecular function|glutathione transferase activity|NAS|GO:0004364|Proteome|11002423//molecular function|glutathione transferase activity|NAS|GO:0004364|Proteome|11002423//biological process|defense response|IEA|GO:0006952|Proteome|11002423//biological pr
								CG7918	0.69	0.38	0.44	0.25	-0.53	-0.08	-0.46	0.07	0.1	0.25	0.32	0.1	CG7918	CG7918	CG7918	||anon-WO0170980.91||anon-WO0170980.92||CG7918||	40955	3R	840000000000	molecular function|muscarinic acetylcholine receptor activity|ISS|GO:0004981|Proteome|11002423//biological process|acetylcholine receptor signaling, muscarinic pathway|ISS|GO:0007213|Proteome|11002423//cellular component|integral to membrane|NAS|GO:001602
								CG4233	1.75	0.56	0.13	0.31	-0.69	-0.72	-0.9	-0.28	-0.46	0.62	0.99	0.22	CG4233	Glutamate oxaloacetate transaminase 2	Got2	||Got-2||Got||got2||Got2||CG4233||	44138	NA	22A8-22B9	molecular function|aspartate transaminase activity|NAS|GO:0004069|Proteome|11002423//biological process|glutamate biosynthesis|NAS|GO:0006537|Proteome|11002423//biological process|synaptogenesis|IMP|GO:0007416|Proteome|11002423//biological process|neurotr
								CG13154	2.84	1.91	0.63	1.27	-1.41	-0.28	-0.34	-0.56	-1.51	1.47	1.34	0.82	CG13154	CG13154	CG13154	NA	36359	2R	49A4	NA
								CG11876	1.01	0.48	0.17	0.25	-0.79	-0.3	-0.55	-0.09	-0.58	0.82	0.75	0.6	CG11876	CG11876	CG11876	||CG11876||	43437	3R	98F10	molecular function|transcription factor activity|IEA|GO:0003700|Proteome|11002423//biological process|tricarboxylic acid cycle|ISS|GO:0006099|Proteome|11002423//biological process|regulation of transcription, DNA-dependent|ISS|GO:0006355|Proteome|11002423
								CG3127	1.6	0.51	-0.15	0.44	-1.05	-0.42	-0.61	-0.32	-0.52	0.75	1.16	0.17	CG3127	Phosphoglycerate kinase	Pgk	||ESTS:169C9S||pgk||Pgk||PGK||anon-sts18||CG3127||169C9S||	33461	2L	23A3	biological process|phosphorylation|NAS|GO:0016310|Proteome|11002423//molecular function|carbohydrate kinase activity|IEA|GO:0019200|Proteome|11002423//molecular function|phosphoglycerate kinase activity|NAS|GO:0004618|Proteome|11002423//molecular function
								CG2151	1.6	0.45	0.23	0.33	-1.03	-0.24	-0.44	-0.21	-0.35	0.44	1.06	0.55	CG2151	Thioredoxin reductase-1	Trxr-1	||Trxr1||l(1)G0481||glutathione reductase||Glutathione reductase||l(1)G0477||l(1)G0379||DTR||thioredoxin reductase-1||thioredoxin reductase||trxr-1||Trxr-1||TrxR-1||TrxR||CG2151||anon-WO03040301.185||anon-WO03040301.187||disulfide reductase||GR||Gr||gr||d	31760	NA	7D22-7E1	molecular function|NOT glutathione-disulfide reductase activity|NAS|GO:0004362|Proteome|11002423//molecular function|thioredoxin-disulfide reductase activity|ISS|GO:0004791|Proteome|11002423//molecular function|thioredoxin-disulfide reductase activity|ISS
								CG7458	2.58	1.13	0.51	0.76	-1.77	-0.48	-0.88	-0.31	-0.91	1.41	1.47	0.64	CG7458	CG7458	CG7458	||CG7458||	40441	3L	79A4-79A5	biological process|carbohydrate metabolism|IEA|GO:0005975|Proteome|11002423//biological process|cation transport|IEA|GO:0006812|Proteome|11002423//biological process|extracellular transport|IEA|GO:0006858|Proteome|11002423//biological process|carbohydrate
								CG7710	1.47	0.62	0.75	0.84	-1.41	-0.92	-1.01	-0.18	-0.28	0.48	1.14	0.04	CG7710	NA	NA	NA	192347	NA	NA	NA
								CG15043	2.97	0.5	1.22	1.3	-1.45	-0.55	-1.3	-0.18	-1.46	1.16	1.63	1.14	CG15043	CG15043	CG15043	NA	32835	X	17B5	NA
								CG31116	1.63	0.27	0.38	0.78	-0.97	-0.13	-0.83	-0.07	-0.54	0.69	0.89	0.47	CG31116	CG31116	CG31116	||FBgn0037951||CG31116||CG14726||CG6942||	41428	3R	86F8	molecular function||IEA|GO:0005247|Proteome|11002423//cellular component|membrane|IEA|GO:0016020|Proteome|11002423//molecular function|chloride channel activity|ISS|GO:0005254|Proteome|11002423//biological process|chloride transport|IDA|GO:0006821|Proteom
								CG3752	1.93	-0.05	1.24	0.78	-1.61	-0.65	-1.24	-0.28	-0.62	0.93	1.1	0.46	CG3752	Aldehyde dehydrogenase	Aldh	||ACDH||Aldh||CG3752||Acetaldehyde dehydrogenase||	252769	NA	NA	molecular function|aldehyde dehydrogenase (NAD) activity|ISS|GO:0004029|Proteome|11002423//cellular component|cytoplasm|IEA|GO:0005737|Proteome|11002423//cellular component|mitochondrion|ISS|GO:0005739|Proteome|11002423//molecular function|aldehyde dehydr
								CG18617	2.1	0.99	0.49	0.85	-1.68	-0.73	-1	-0.27	-0.54	0.36	1.05	0.39	CG18617	Vha100-2	Vha100-2	||anon-WO0118547.296||V-ATPase||CG18617||BcDNA:LD21735||vha100-2||Vha100-2||CG7679||	42216	3R	91A5	molecular function|copper ion binding|IEA|GO:0005507|Proteome|11002423//biological process|cation transport|IEA|GO:0006812|Proteome|11002423//biological process|proton transport|NAS|GO:0015992|Proteome|11002423//cellular component|hydrogen-transporting AT
								CG1417	1.83	0.23	0.44	0.56	-0.93	-0.37	-0.89	-0.19	-0.4	0.27	0.73	-0.03	CG1417	sluggish A	slgA	||sluggish-A||sluggish||slg||slgA||EE85||CG1417||proline dehydrogenase||tu3||PRODH||sl||	33117	X	19F6-20A1	biological process|locomotory behavior|IMP|GO:0007626|Proteome|11002423//molecular function|proline dehydrogenase activity|ISS|GO:0004657|Proteome|11002423//molecular function|proline dehydrogenase activity|ISS|GO:0004657|Proteome|11002423//cellular compo
								CG7176	2.37	0.09	0.62	0.63	-1.74	-0.56	-1.2	-0.19	-0.6	0.58	0.99	-0.19	CG7176	Isocitrate dehydrogenase	Idh	||CT22171||NADP-IDH||Idh-NADP||IDH-NADP||idh||Idh||IDH||l(3)L3852||CG7176||	44291	3L	66C8	molecular function|isocitrate dehydrogenase (NADP+) activity|ISS|GO:0004450|Proteome|11002423//molecular function|isocitrate dehydrogenase (NADP+) activity|ISS|GO:0004450|Proteome|11002423//molecular function|isocitrate dehydrogenase (NADP+) activity|ISS|
								CG18854	0.75	0.28	0.63	0.26	-0.75	-0.16	-0.44	-0.16	-0.29	0.17	0.43	0.38	CG18854	CG18854	CG18854	||CG13122||CG18854||	59212	2L	30D1	molecular function|inositol-trisphosphate 3-kinase activity|IEA|GO:0008440|Proteome|11002423//molecular function|inositol-trisphosphate 3-kinase activity|IEA|GO:0008440|Proteome|11002423//
								CG7299	3.05	0.81	1.63	0.6	-2.73	-0.5	-1.75	-0.77	-0.59	0.63	2.09	0.42	CG7299	CG7299	CG7299	NA	34468	2L	32A4	NA
								CG10527	2.49	0.82	1.18	0.55	-1.41	-0.27	-1.27	-0.56	-0.87	0.78	1.43	0.79	CG10527	CG10527	CG10527	||CG10527||	37393	2R	57B16	molecular function|farnesoic acid O-methyltransferase activity|ISS|GO:0019010|Proteome|11002423//
								CG12055	1.85	0.73	0.71	0.3	-1.37	-0.37	-1.13	-0.08	-0.4	0.54	0.68	0.35	CG12055	Glyceraldehyde 3 phosphate dehydrogenase 1	Gapdh1	||Gapdh43E||Glyceraldehyde-3-phosphate dehydrogenase1||gapdh-1||Gapdh-1||GAPDH-1||Gapdh||GAPDH||GADPH||gh12586||Gapdh1||GA3PDH||CG12055||G3-P dehydrogenase||Gapd||BEST:GH12586||GAPDH I||	35728	NA	4.3e+18	molecular function|glyceraldehyde-3-phosphate dehydrogenase (phosphorylating) activity|NAS|GO:0004365|Proteome|11002423//biological process|glycolysis|IEA|GO:0006096|Proteome|11002423//molecular function|glyceraldehyde-3-phosphate dehydrogenase (phosphory
								CG7010	1.86	0.36	0.75	0.37	-1.07	-0.55	-0.8	-0.28	-0.3	0.61	0.77	0.34	CG7010	lethal (1) G0334	l(1)G0334	||Pyruvate dehydrogenase||CG7010||l(1)G0334||	31406	X	4C14	biological process|tricarboxylic acid cycle|ISS|GO:0006099|Proteome|11002423//molecular function|pyruvate dehydrogenase (acetyl-transferring) activity|ISS|GO:0004739|Proteome|11002423//molecular function|pyruvate dehydrogenase (acetyl-transferring) activi
								CG18251	1.16	0.16	-0.41	0.28	-0.79	-1.45	-1.29	-0.25	-2.08	1.21	0.32	-0.58	CG18251	NA	NA	NA	192347	NA	NA	NA
								CG14324	1.43	1.16	0.65	1.07	-0.29	-0.8	-0.44	-0.36	-1.32	1.53	1.7	0.69	CG14324	CG14324	CG14324	NA	42119	3R	90B6	NA
								CG9070	1.16	1.18	0.37	0.77	-0.61	-0.33	-0.42	-0.45	-1.16	1.57	0.98	0.21	CG9070	CG9070	CG9070	||CG9070||BcDNA:RE09259||	36196	2R	47000	molecular function|transporter activity|IEA|GO:0005215|Proteome|11002423//cellular component|extracellular|ISS|GO:0005576|Proteome|11002423//biological process|transport|IEA|GO:0006810|Proteome|11002423//molecular function||IEA|GO:0042302|Proteome|1100242
								CG14290	0.63	0.17	0.26	0	-0.44	-0.01	-0.35	0.09	-0.25	0.55	0.86	-0.1	CG14290	CG14290	CG14290	NA	42268	3R	91D5	NA
								CG16758	0.59	0.36	0.8	0.24	-0.44	0.04	-0.63	-0.17	-0.37	0.54	1.07	0.46	CG16758	CG16758	CG16758	||c62E-15||CG16758||CG16760||	38315	3L	620000	biological process|purine base metabolism|IEA|GO:0006144|Proteome|11002423//molecular function|purine-nucleoside phosphorylase activity|ISS|GO:0004731|Proteome|11002423//
								CG30279	0.42	-0.12	1.44	0.39	-0.5	-0.16	-1	-0.19	-0.53	0.33	0.96	0.38	CG30279	CG30279	CG30279	||CG30279||	246524	NA	58C5	biological process|biological_process unknown|ND|GO:0000004|Proteome|11002423//molecular function|molecular_function unknown|ND|GO:0005554|Proteome|11002423//cellular component|cellular_component unknown|ND|GO:0008372|Proteome|11002423//
								CG8661	1.95	0.41	1.25	0.41	-1.13	-0.36	-1.14	-0.12	-1.64	0.61	1.67	0.51	CG8661	CG8661	CG8661	NA	32720	X	15F9-16A1	NA
								CG8664	1.02	-0.21	0.54	0.22	-0.81	-0.18	-1	0.02	-0.93	0.44	0.95	0.51	CG8664	CG8664	CG8664	NA	32719	X	15F9	NA
								CG4312	2.46	0.73	2.95	1	-2.38	-1.3	-1.63	-0.51	-2.27	1.99	2.2	1.28	CG4312	Metallothionein B	MtnB	||Mto||MTO||DrosMto||MtnB||CG4312||MTN||	42424	3R	92E12-92E13	molecular function|copper ion binding|IEA|GO:0005507|Proteome|11002423//biological process|metal ion homeostasis|NAS|GO:0006875|Proteome|11002423//molecular function|metal ion binding|NAS|GO:0046872|Proteome|11002423//molecular function|metal ion binding|
								CG15756	0.86	0.24	1.36	0.36	-0.78	-0.2	-0.84	0.07	-0.35	0.34	0.67	0.43	CG15756	CG15756	CG15756	NA	32308	X	12A3	NA
								CG3029	0.9	0.1	1.39	0.29	-1.28	-0.26	-0.87	0.05	-0.51	0.43	0.83	0.35	CG3029	orange	or	||cg3029||CG3029||&sgr;3||or||AP-3&sgr;||	43943	2R	60A14	biological process|intracellular protein transport|IEA|GO:0006886|Proteome|11002423//biological process|intracellular protein transport|IEA|GO:0006886|Proteome|11002423//biological process|receptor mediated endocytosis|IEA|GO:0006898|Proteome|11002423//bi
								CG15800	0.71	0.07	0.76	0.17	-0.97	-0.29	-0.9	-0.34	-0.29	0.73	0.77	0.44	CG15800	CG15800	CG15800	||CG15800||	37763	NA	60A1	cellular component|nuclear ubiquitin ligase complex|ISS|GO:0000152|Proteome|11002423//molecular function|ubiquitin-protein ligase activity|IDA|GO:0004842|Proteome|11002423//
								CG30281	1.13	-0.08	1.25	0.34	-0.87	-0.33	-1.33	-0.38	-0.59	0.58	1.08	0.4	CG30281	CG30281	CG30281	||CG30281||CG6676||	246525	2R	58B9	molecular function|receptor binding|IEA|GO:0005102|Proteome|11002423//biological process|defense response|IEA|GO:0006952|Proteome|11002423//biological process|defense response to bacteria|IEA|GO:0042742|Proteome|11002423//
								CG12522	1.25	1.03	-0.24	0.09	-0.62	-0.9	-1.35	-0.29	-1.07	1.82	1.96	0.08	CG12522	CG12522	CG12522	NA	39248	NA	68A7	NA
								CG4094	0.75	0.56	-0.18	0.02	-0.58	-0.28	-0.85	-0.1	-0.46	1	0.76	-0.13	CG4094	lethal (1) G0255	l(1)G0255	||l(1)G0290||l(1)G0255||FBgn0029889||CG4094||	31605	X	6C5	biological process|fumarate metabolism|IEA|GO:0006106|Proteome|11002423//cellular component||IEA|GO:0045239|Proteome|11002423//molecular function|fumarate hydratase activity|ISS|GO:0004333|Proteome|11002423//molecular function|fumarate hydratase activity|
								CG14570	-0.32	-0.03	0.18	0.24	-0.17	-1.03	-1.08	0.09	-2.52	1.42	0.65	-0.69	CG14570	CG14570	CG14570	NA	40416	NA	7800000	NA
								CG11368	0.59	0.53	0.07	0.1	0	-0.46	-0.93	0.19	-0.97	1.61	1.58	0.86	CG11368	CG11368	CG11368	NA	50397	X	7B2	NA
								CG3835	0.28	0.34	0.21	0.35	0.08	-0.24	-0.92	0.01	-0.85	1.63	1	0.35	CG3835	CG3835	CG3835	||EG:87B1.3||CG3835||EG87B1||	31184	X	2D4	biological process|carbohydrate metabolism|IEA|GO:0005975|Proteome|11002423//biological process|electron transport|IEA|GO:0006118|Proteome|11002423//molecular function|oxidoreductase activity|IEA|GO:0016491|Proteome|11002423//
								CG11300	0.16	0.33	0.53	0.15	-0.31	-0.42	-1.43	0.27	-1.2	2.87	1.94	0.1	CG11300	CG11300	CG11300	NA	37760	2R	59F7	NA
								CG12386	0.17	0.2	0.27	-0.02	-0.11	-0.21	-0.37	0.05	-0.74	1.17	0.83	0.11	CG12386	NA	NA	NA	192347	NA	NA	NA
								CG10790	0.68	0.04	0.17	-0.12	-0.04	-0.31	-1.26	-0.05	-0.7	1.44	1.39	0.22	CG10790	Pre-intermoult gene 1	Pig1	NA	31303	NA	3C10	NA
								CG8836	0.32	0.07	0.02	0.35	-0.22	-0.37	-1.14	-0.18	-0.58	1.38	1.29	0.42	CG8836	CG8836	CG8836	||CG8836||	36349	NA	49A2	molecular function|structural constituent of larval cuticle (sensu Insecta)|NAS|GO:0008010|Proteome|11002423//
								CG15871	0.35	0.19	0.01	-0.07	-0.07	-0.68	-0.32	-0.17	-1.09	0.76	1.02	-0.08	CG15871	mitochondrial ribosomal protein L38	mRpL38	||CG15871||MRP-L3||mRpL38||mitochondrial ribosomal protein L3a||mRpL3a||	32375	X	1200000	molecular function|structural constituent of ribosome|IEA|GO:0003735|Proteome|11002423//cellular component|mitochondrial large ribosomal subunit|ISS|GO:0005762|Proteome|11002423//biological process|protein biosynthesis|IEA|GO:0006412|Proteome|11002423//mo
								CG10181	0.56	0.33	-0.03	0.19	-0.37	-0.66	-1.48	-0.39	-1.63	2.06	1.28	0.27	CG10181	Multiple drug resistance 65	Mdr65	||P-glycoprotein65-Dm||CG10181||Mdr65||Mdr65A||	38726	3L	65A10	molecular function|nucleotide binding|IEA|GO:0000166|Proteome|11002423//molecular function|ATP binding|IEA|GO:0005524|Proteome|11002423//biological process|extracellular transport|IEA|GO:0006858|Proteome|11002423//biological process|defense response|IEA|G
								CG14419	0.49	-0.21	0.04	0.05	0.04	-1.03	-1.2	-0.11	-1.57	1.31	1.03	-0.04	CG14419	CG14419	CG14419	NA	31276	X	3C2	NA
								CG4781	0.26	0	0.18	0	-0.17	-0.61	-0.84	-0.11	-1.84	1.36	0.99	-0.06	CG4781	CG4781	CG4781	NA	37943	2R	60D10	NA
								CG2275	0.47	0.17	0.24	0.63	-0.09	-0.18	-0.83	-0.17	-0.78	0.54	0.88	0.21	CG2275	Jun-related antigen	Jra	||lethal(2)IA109||dJra||dJRA||AP1||Jun||d-JRA||cJun||DJUN||DJun||Complementation group V||l(2)IA109||dAP-1||V||CG2275||Jra||JRA||d-jun||D-Jun||l(2)46Ef||l(2R)IA109||lethal(2)1A109||dm-Jun||jun||AP-1||dJun||dJUN||Djun||Jun oncogene||c-Jun||jra||D-jun||d-Ju	36057	2R	46E4-46E5	cellular component|nucleus|IEA|GO:0005634|Proteome|11002423//cellular component|cytoplasm|IEA|GO:0005737|Proteome|11002423//molecular function|DNA binding|ISS|GO:0003677|Proteome|11002423//molecular function|transcription factor activity|IEA|GO:0003700|Pr
								CG12242	0.79	0.11	0.94	0.97	-0.6	-0.23	-1.1	-0.12	-1.21	1.57	0.98	0.22	CG12242	Glutathione S transferase D5	GstD5	||gstD24||GstD24||DmGSTD5||DmGST24||CG12242||Gst||GST||GstD5||Glutathione S transferase D24||	48338	NA	87B8	molecular function|glutathione transferase activity|NAS|GO:0004364|Proteome|11002423//molecular function|glutathione transferase activity|NAS|GO:0004364|Proteome|11002423//
								CG4104	0.96	0.15	0.31	1.45	-0.68	-0.31	-0.83	-0.35	-1.12	1.32	0.83	0.09	CG4104	Trehalose-6-phosphate synthase 1	Tps1	||trehalose-6-phosphate synthase||l(2)jf4||CG4104||l(2)jf5||jf5||TPS||BcDNA:GH08860||tps1||Tps1||lethal(2)24Ea||l(2)24Ea||dtps1||Trehalos-6-phosphate synthase||TreS||l(2)k08903||	33642	2L	24E4-24E5	molecular function|trehalose-phosphatase activity|IEA|GO:0004805|Proteome|11002423//biological process|disaccharide metabolism|IEA|GO:0005984|Proteome|11002423//biological process||IEA|GO:0005992|Proteome|11002423//molecular function|alpha,alpha-trehalose
								CG15046	0.67	0.08	0.69	0.19	-0.22	-0.81	-0.61	0.03	-0.8	1.04	1.01	0.33	CG15046	CG15046	CG15046	NA	32833	NA	17B5	NA
								CG12506	2.11	-0.04	1.05	0.47	-0.34	-1.71	-1.7	-0.2	-1.1	1.54	1.97	0.66	CG12506	CG12506	CG12506	NA	33249	2L	2100	NA
								CG13946	2.03	0.06	1.68	0.51	-0.15	-1.5	-1.69	-0.15	-1.26	1.8	2.29	1.01	CG13946	CG13946	CG13946	NA	50198	2L	2100	NA
								CG17814	0.76	0.22	0.67	0.34	-0.63	-0.51	-1.08	0.05	-0.45	0.72	0.84	-0.1	CG17814	Peritrophin-15a	Peritrophin-15a	||Peritrophin-15a||Dm15a||CT39472||Dm-peritrophin-15a||CG17814||	50433	2L	29C1	cellular component|extracellular space|IEA|GO:0005615|Proteome|11002423//molecular function|chitin binding|IEA|GO:0008061|Proteome|11002423//biological process|biological_process unknown|ND|GO:0000004|Proteome|11002423//
								CG5883	0.84	-0.04	0.35	0.12	-0.27	-0.51	-1.46	-0.15	-0.52	0.95	1.02	0.14	CG5883	CG5883	CG5883	||CG5883||	39352	3L	68000	cellular component|extracellular|ISS|GO:0005576|Proteome|11002423//biological process|chitin metabolism|IEA|GO:0006030|Proteome|11002423//molecular function|chitin binding|IEA|GO:0008061|Proteome|11002423//molecular function|structural constituent of peri
								CG33085	0.5	0.12	0.31	0.33	0.04	-0.09	-0.65	-0.24	-0.67	1.13	1.63	0.43	CG33085	NA	NA	NA	192347	NA	NA	NA
								CG33306	0.81	0	0.54	0.33	-0.34	-0.17	-0.96	-0.02	-0.95	1.1	2.21	0.27	CG33306	CG33306	CG33306	||CG16887||BG:DS00941.11||CG33306||DS00941.11||BcDNA:GM14937||	34798	NA	34D6-34D7	biological process|biological_process unknown|ND|GO:0000004|Proteome|11002423//molecular function|molecular_function unknown|ND|GO:0005554|Proteome|11002423//cellular component|cellular_component unknown|ND|GO:0008372|Proteome|11002423//
								CG2772	0.73	-0.23	0.68	0.23	-0.34	-0.15	-0.98	-0.24	-0.95	0.77	1.43	0.3	CG2772	CG2772	CG2772	||BcDNA:RE45077||CG2772||	33559	2L	23F3	biological process|lipid metabolism|IEA|GO:0006629|Proteome|11002423//biological process|lipid metabolism|IEA|GO:0006629|Proteome|11002423//molecular function|triacylglycerol lipase activity|NAS|GO:0004806|Proteome|11002423//
								CG8157	0.45	-0.08	0.7	0.15	-0.5	-0.33	-0.91	-0.16	-0.55	0.6	1.24	0.49	CG8157	CG8157	CG8157	NA	36700	2R	51F6	NA
								CG31893	1.51	0.29	0.88	0.52	-0.48	-0.17	-0.48	-0.32	-0.67	1.89	1.7	0.7	CG31893	Peritrophin-15b	Peritrophin-15b	||Peritrophin-15b||Dm15b||CG31893||Dm-peritrophin-15b||CG13395||	50432	2L	29C1	cellular component|extracellular space|IEA|GO:0005615|Proteome|11002423//molecular function|chitin binding|IEA|GO:0008061|Proteome|11002423//biological process|biological_process unknown|ND|GO:0000004|Proteome|11002423//
								CG6839	1.21	0.31	0.37	0.29	-0.53	-0.28	-0.4	-0.17	-0.65	1.91	1.13	0.38	CG6839	CG6839	CG6839	||CG6839||	40067	3L	7500000	molecular function|nucleic acid binding|IEA|GO:0003676|Proteome|11002423//molecular function|endonuclease activity|IDA|GO:0004519|Proteome|11002423//
								CG8509	0.69	0.04	0.78	0.38	-0.59	-0.06	-0.36	-0.3	-0.23	1.21	0.74	0.06	CG8509	CG8509	CG8509	||CG8509||	32535	X	13F1	molecular function|protein tyrosine phosphatase activator activity|NAS|GO:0008160|Proteome|11002423//
								CG14375	0.35	0.22	0.53	0.12	-0.6	-0.04	-0.34	0.1	-0.14	1.17	1	0.2	CG14375	CG14375	CG14375	NA	41648	3R	8700000000	NA
								CG33307	0.6	0.1	0.64	0.12	-0.83	0.06	-0.84	-0.06	-0.47	1.86	0.79	0.2	CG33307	NA	NA	NA	192347	NA	NA	NA
								CG15369	1.26	0.05	0.43	0.23	-1.63	-1.41	-0.64	0.05	-0.92	1.52	1.28	0.77	CG15369	CG15369	CG15369	||CG15369||	31862	X	8D9	molecular function|cysteine protease inhibitor activity|NAS|GO:0004869|Proteome|11002423//
								CG9877	1.1	0.02	0.44	-0.12	-1.85	-1.34	-1.09	-0.23	-1.89	1.52	1.04	0.86	CG9877	CG9877	CG9877	NA	37666	2R	59C3	NA
								CG17738	1.51	-0.16	0.54	0.36	-1.21	-0.69	-0.95	-0.23	-0.53	1.47	0.97	1.27	CG17738	CG17738	CG17738	NA	41490	NA	87B4	NA
								CG5805	0.56	-0.08	0.34	0.17	-0.64	-0.28	-0.64	-0.04	-0.5	0.92	0.22	0.17	CG5805	CG5805	CG5805	||CG5805||	42950	3R	96A22	molecular function|binding|TAS|GO:0005488|Proteome|11002423//cellular component|mitochondrial inner membrane|ISS|GO:0005743|Proteome|11002423//biological process|transport|IEA|GO:0006810|Proteome|11002423//biological process|transport|IEA|GO:0006810|Prote
								CG9682	1.39	-0.03	0.36	0.44	-1.37	-0.49	-0.67	0.24	-0.84	1.8	0.85	0.44	CG9682	CG9682	CG9682	NA	43602	3R	99000	NA
								CG6878	0.44	0.43	0.63	0.57	-0.74	-0.29	-0.76	-0.2	-0.56	0.56	0.84	-0.02	CG6878	CG6878	CG6878	NA	39656	NA	71B6	NA
								CG10732	0.87	0.84	0.79	0.91	-0.91	-0.48	-0.65	-0.26	-0.74	1.35	0.78	0.2	CG10732	CG10732	CG10732	NA	39513	NA	70B1	NA
								CG14818	0.73	0.69	0.52	0.69	-1	-0.73	-0.75	-0.14	-0.65	1.03	0.91	0.09	CG14818	CG14818	CG14818	||CT34631||CG14818||BcDNA:RE09176||EG:63B12.12||BcDNA:RH52516||	31147	X	2B14	biological process|biological_process unknown|ND|GO:0000004|Proteome|11002423//molecular function|molecular_function unknown|ND|GO:0005554|Proteome|11002423//cellular component|cellular_component unknown|ND|GO:0008372|Proteome|11002423//
								CG2556	0.59	0.32	0.38	0.33	-1.2	-0.12	-0.82	-0.07	-0.48	0.76	0.91	0.17	CG2556	CG2556	CG2556	NA	32201	X	11A12	NA
								CG7224	0.85	0.41	-0.09	0.81	-1.15	-0.45	-1.06	-0.38	-0.63	0.92	1.06	0.19	CG7224	NA	NA	NA	192347	NA	NA	NA
								CG12388	0.48	0.32	0.26	0.31	-0.5	-0.15	-0.39	-0.09	-0.38	0.91	1.15	0.06	CG12388	NA	NA	NA	192347	NA	NA	NA
								CG32073	0.73	0.94	0.34	0.56	-0.36	-0.42	-0.79	-0.2	-0.96	1.67	1.75	0.16	CG32073	CG32073	CG32073	||CG32073||	326191	NA	68A7	biological process|biological_process unknown|ND|GO:0000004|Proteome|11002423//molecular function|molecular_function unknown|ND|GO:0005554|Proteome|11002423//cellular component|cellular_component unknown|ND|GO:0008372|Proteome|11002423//
								CG11796	0.74	0.06	0.05	-0.13	-1	-0.4	-0.85	-0.21	-0.43	1.15	1.08	0.36	CG11796	CG11796	CG11796	||CG11796||	40263	3L	77C3	biological process|amino acid catabolism|IEA|GO:0009063|Proteome|11002423//biological process||IEA|GO:0009072|Proteome|11002423//molecular function|4-hydroxyphenylpyruvate dioxygenase activity|ISS|GO:0003868|Proteome|11002423//molecular function|4-hydroxy
								CG7144	0.25	0.39	0.27	0.21	-0.59	-0.25	-0.99	0.07	-1	1.25	1.34	0.29	CG7144	CG7144	CG7144	||CG7144||CK02318||BEST:CK02318||anon-WO0149856.1||	34064	2L	28C4	biological process|electron transport|IEA|GO:0006118|Proteome|11002423//biological process|amino acid catabolism|IEA|GO:0009063|Proteome|11002423//molecular function|saccharopine dehydrogenase (NAD+, L-lysine-forming) activity|ISS|GO:0004754|Proteome|1100
								CG8696	0.2	0.51	0.59	0.2	-1.03	-0.19	-1.26	-0.24	-1.51	1.38	1.54	-0.17	CG8696	Larval visceral protein H	LvpH	||hdl cuticle gene cluster.||H||LvpH||gene V||V||maltase||CG8696||	35824	2R	44D1	molecular function|alpha-amylase activity|IEA|GO:0004556|Proteome|11002423//molecular function|alpha-glucosidase activity|NAS|GO:0004558|Proteome|11002423//molecular function|alpha-glucosidase activity|NAS|GO:0004558|Proteome|11002423//molecular function|
								CG15203	0.25	0.07	0.39	0.24	-0.52	-0.38	-1.14	-0.01	-0.98	0.93	0.92	0.01	CG15203	CG15203	CG15203	NA	32038	X	10A4	NA
								CG3746	0.22	0.12	0.56	0.19	-0.47	-0.59	-1.2	-0.1	-1.34	0.8	1.34	0.14	CG3746	CG3746	CG3746	NA	37593	2R	58F4	NA
								CG6426	-0.06	0.3	0.37	0.22	-0.62	-0.65	-1.4	-0.34	-1.7	1.09	1.51	0.07	CG6426	CG6426	CG6426	||n(2)k04810||CG6426||BcDNA:RH01665||l(2)k04810||	36891	2R	53D14	molecular function|calcium ion binding|IEA|GO:0005509|Proteome|11002423//biological process|defense response|IEA|GO:0006952|Proteome|11002423//biological process|defense response to bacteria|IEA|GO:0042742|Proteome|11002423//
								CG6298	1.07	0.17	1.07	0.72	-2.12	-0.2	-1.98	0.01	-2.88	1.4	2.27	0.7	CG6298	Jonah 74E	Jon74E	||SP85||CG6298||CT19724||Jon74E||	39959	3L	74D3-74D4	molecular function|trypsin activity|IEA|GO:0004295|Proteome|11002423//molecular function|chymotrypsin activity|NAS|GO:0004263|Proteome|11002423//molecular function|chymotrypsin activity|NAS|GO:0004263|Proteome|11002423//biological process|proteolysis and
								CG11309	0.37	0.09	0.36	0.2	-0.7	-0.3	-0.35	0.33	-1.35	0.76	0.83	0.33	CG11309	CG11309	CG11309	||CG11309||	40356	3L	78C6	molecular function|calcium ion binding|IEA|GO:0005509|Proteome|11002423//molecular function|hydrolase activity|IEA|GO:0016787|Proteome|11002423//
								CG11765	0.56	0.56	0.8	0.5	-0.66	-0.7	-0.83	-0.1	-1.83	0.94	1.36	0.56	CG11765	Peroxiredoxin 2540	Prx2540-2	||DPx-2540-2||Prx2540-2||Prx2540||CG11765||DPx2540||	36098	2R	47A7	biological process|oxygen and reactive oxygen species metabolism|NAS|GO:0006800|Proteome|11002423//biological process|defense response|IEA|GO:0006952|Proteome|11002423//molecular function|peroxidase activity|ISS|GO:0004601|Proteome|11002423//molecular fun
								CG13632	1.86	0.88	0.76	0.19	-1.29	-0.42	-0.47	-0.09	-1.25	1.43	1.42	0.11	CG13632	CG13632	CG13632	NA	42948	NA	96A21	NA
								CG3792	1.06	0.21	0.41	0.2	-0.35	-0.34	-0.23	-0.05	-0.62	0.88	0.67	-0.17	CG3792	CG3792	CG3792	||CG3792||anon-EST:Posey8||	33717	NA	25B8	cellular component|integral to membrane|NAS|GO:0016021|Proteome|11002423//
								CG9390	0.95	0.32	0.1	0.02	-0.6	-0.02	-0.81	0.07	-1.11	0.72	1.34	0.3	CG9390	Acetyl Coenzyme A synthase	AcCoAS	||Acetyl-CoA synthase||acetyl CoA synthase||Acetyl CoA synthase||acetate-coenzyme A ligase||BEST:GH28401||ACS||AcCoAS||acetyl-CoA synthetase||Acetyl CoA synthetase||CG9390||	40348	NA	78C3-78C4	biological process|fatty acid metabolism|IEA|GO:0006631|Proteome|11002423//molecular function|acetate-CoA ligase activity|ISS|GO:0003987|Proteome|11002423//molecular function|acetate-CoA ligase activity|ISS|GO:0003987|Proteome|11002423//cellular component
								CG11198	0.76	0.03	0.01	-0.07	-0.76	-0.42	-0.61	-0.21	-0.72	0.58	1.21	0.33	CG11198	CG11198	CG11198	||DmACC||Acetyl CoA carboxylase||FBgn0043811||CG8723||CG11198||Acetyl-CoA carboxylase||	35761	2R	44A1-44A2	molecular function||IEA|GO:0004075|Proteome|11002423//molecular function|ATP binding|IEA|GO:0005524|Proteome|11002423//biological process|fatty acid biosynthesis|IEA|GO:0006633|Proteome|11002423//cellular component||IEA|GO:0009343|Proteome|11002423//molec
								CG4370	0.52	-0.2	0.02	0.32	-0.51	-0.28	-0.76	-0.19	-1.14	1.4	1.31	0.43	CG4370
								CG10001	0.85	0.34	0.69	0.54	-1.15	-0.54	-0.33	-0.17	-0.68	0.85	0.62	0.3	CG10001	Allatostatin Receptor 2	AR-2	||D.AlstR2||AR-2||CG10001||anon-WO0170980.115||DAR-2||anon-WO0170980.116||anon-WO0131005.7||DAR||	43393	3R	98E2-98E3	molecular function|galanin receptor activity|IEA|GO:0004966|Proteome|11002423//molecular function|G-protein coupled receptor activity|IEA|GO:0004930|Proteome|11002423//biological process|G-protein coupled receptor protein signaling pathway|IEA|GO:0007186|
								CG12387	1.03	0.29	0.84	0.72	-2.32	-0.5	-0.66	-0.33	-1.29	1.42	1.34	0.74	CG12387	NA	NA	NA	192347	NA	NA	NA
								CG14777	0.98	0.52	0.79	0.81	-1.64	-0.87	-0.8	-0.3	-1.46	1.46	1.82	0.42	CG14777	CG14777	CG14777	||BcDNA:RH63812||EG:80H7.10||CG14777||	31099	NA	2A4	molecular function|receptor signaling protein activity|IEA|GO:0005057|Proteome|11002423//biological process|development|IEA|GO:0007275|Proteome|11002423//cellular component|integral to membrane|NAS|GO:0016021|Proteome|11002423//
								CG3609	0.39	0.26	0.5	0.36	-0.98	-0.3	-0.53	-0.53	-0.86	0.76	0.82	0.38	CG3609	CG3609	CG3609	||CT12127||CG3609||	33421	2L	220	biological process|electron transport|IEA|GO:0006118|Proteome|11002423//biological process|metabolism|IEA|GO:0008152|Proteome|11002423//molecular function|oxidoreductase activity|IEA|GO:0016491|Proteome|11002423//molecular function|oxidoreductase activity
								CG8051	0.26	0.13	0.27	0.27	-0.51	-0.12	-0.11	-0.3	-1.04	1.11	1.18	0.32	CG8051	CG8051	CG8051	||CG8051||EP(X)1550||anon-WO03002137.1||	32925	X	18C1	biological process|transport|IEA|GO:0006810|Proteome|11002423//cellular component|integral to membrane|NAS|GO:0016021|Proteome|11002423//molecular function|monocarboxylate porter activity|NAS|GO:0015355|Proteome|11002423//
								CG8196	0.38	0.45	0.41	0.3	-0.5	-0.21	-0.37	-0.02	-1.11	0.98	1.42	0.07	CG8196	Ance-4	Ance-4	||Ance-4||CG8196||	35909	2R	45A1	molecular function|peptidyl-dipeptidase A activity|IEA|GO:0004246|Proteome|11002423//biological process|proteolysis and peptidolysis|NAS|GO:0006508|Proteome|11002423//cellular component|membrane|IEA|GO:0016020|Proteome|11002423//
								CG11852	1.32	0.62	0.35	0.86	-1.32	-0.6	-0.77	-0.29	-1.95	1.67	2.33	1.26	CG11852	CG11852	CG11852	NA	43035	3R	96C7	NA
								CG7953	0.52	0.43	0.2	0.55	-0.4	-0.42	-0.33	-0.07	-0.58	0.56	1.11	0.34	CG7953	CG7953	CG7953	NA	34801	NA	34D7-34D8	NA
								CG13874	0.43	0.39	0.5	0.62	-1.2	-0.27	-0.68	-0.25	-1.13	0.6	1.76	0.49	CG13874	Odorant-binding protein 56h	Obp56h	||CG13874||56h||Obp56h||OBP56h||	37271	NA	560000	biological process|transport|IEA|GO:0006810|Proteome|11002423//biological process|perception of smell|IMP|GO:0007608|Proteome|11002423//molecular function|odorant binding|IEA|GO:0005549|Proteome|11002423//cellular component|extracellular|ISS|GO:0005576|Pr
								CG10911	0.24	0.4	0.55	0.53	-1.14	-0.55	-0.44	-0.23	-0.74	1.32	1.82	0.29	CG10911	CG10911	CG10911	NA	37058	2R	55B2	NA
								CG14292	0.61	0.19	0.17	0.64	-1.46	-0.23	-0.72	-0.43	-1.03	1.48	1.76	0.67	CG14292	CG14292	CG14292	NA	42264	3R	91D4	NA
								CG3348	0.84	0.34	0.46	0.39	-1.32	-0.66	-0.94	0.05	-1.43	1.54	1.81	-0.23	CG3348	CG3348	CG3348	NA	50082	3R	97F1	NA
								CG33492	0.41	-0.04	0.4	0.16	-0.51	-0.46	-0.79	-0.05	-0.65	0.91	1.03	-0.08	CG33492	NA	NA	NA	192347	NA	NA	NA
								CG13255	0.48	0.4	0.68	0.2	-0.49	-0.19	-0.58	-0.05	-0.53	0.84	0.97	-0.05	CG13255	CG13255	CG13255	NA	50109	3L	77F1	NA
								CG9040	1.78	0.27	1.5	0.35	-1.12	-0.22	-1.22	-0.13	-0.71	2.01	2.07	0.38	CG9040	CG9040	CG9040	NA	39546	3L	70C9	NA
								CG10475	2.46	0.58	1.31	0.6	-1.64	-0.12	-2.05	0.05	-1.91	2.41	2.51	0.39	CG10475	Jonah 65Ai	Jon65Ai	||Jon65A||CG10475||Jonah 65A||Jon65Ai||SP145||CT29408||	38685	3L	65A4	molecular function|chymotrypsin activity|NAS|GO:0004263|Proteome|11002423//molecular function|trypsin activity|IEA|GO:0004295|Proteome|11002423//molecular function|serine-type endopeptidase activity|ISS|GO:0004252|Proteome|11002423//molecular function|ser
								CG17826	0.93	0.32	0.83	0.06	-0.99	-0.1	-1.14	-0.2	-0.68	1.22	1.29	0.13	CG17826	CG17826	CG17826	||CG17826||	39354	NA	68000	cellular component|extracellular|ISS|GO:0005576|Proteome|11002423//biological process|chitin metabolism|IEA|GO:0006030|Proteome|11002423//molecular function|chitin binding|IEA|GO:0008061|Proteome|11002423//
								CG4827	0.59	0.23	0.3	0.23	-1.04	-0.41	-0.5	-0.2	-1.19	1.27	1.51	0.36	CG4827	CG4827	CG4827	||5' nucleotidase precursor||5'-nucleotidase-precursor||CG4827||	36968	2R	54B17	biological process|nucleobase, nucleoside, nucleotide and nucleic acid metabolism|IEA|GO:0006139|Proteome|11002423//biological process||IEA|GO:0009166|Proteome|11002423//molecular function|5'-nucleotidase activity|ISS|GO:0008253|Proteome|11002423//molecul
								CG7021	0.71	-0.09	0.23	0.04	-1.05	-0.25	-0.36	-0.04	-1.2	1.24	1.42	0.28	CG7021	Elastin-like	Ela	||elastin-like||Ela||CG7021||	42970	3R	96B1	cellular component|cytoplasm|IEA|GO:0005737|Proteome|11002423//biological process|phosphate transport|IEA|GO:0006817|Proteome|11002423//
								CG6081	2.16	-0.19	0.98	-0.26	-1.89	-0.87	-1.78	-0.74	-2.42	1.55	1.92	0.49	CG6081	Cyp28d2	Cyp28d2	||28d2||CG6081||Cyp28d2||	33748	2L	25C10	molecular function||IEA|GO:0004497|Proteome|11002423//biological process|electron transport|IEA|GO:0006118|Proteome|11002423//biological process|steroid metabolism|IEA|GO:0008202|Proteome|11002423//molecular function|oxidoreductase activity|IEA|GO:0016491
								CG2185	0.5	0.03	0.34	0	-0.42	-0.18	-0.37	-0.26	-0.48	0.34	0.64	0	CG2185	CG2185	CG2185	||CG2185||	40695	3R	83B8	molecular function|calmodulin binding|TAS|GO:0005516|Proteome|11002423//biological process|intracellular protein transport|IEA|GO:0006886|Proteome|11002423//biological process|exocytosis|IEA|GO:0006887|Proteome|11002423//biological process|intracellular s
								CG6906	0.84	0.11	0.45	0.15	-1.14	-0.28	-0.79	-0.46	-1.3	0.74	1.11	-0.01	CG6906	Carbonic anhydrase 2	CAH2	||CT21171||CAH2||CG6906||	117320	NA	NA	biological process|one-carbon compound metabolism|NAS|GO:0006730|Proteome|11002423//molecular function|zinc ion binding|IEA|GO:0008270|Proteome|11002423//molecular function|carbonate dehydratase activity|ISS|GO:0004089|Proteome|11002423//molecular functio
								CG33302	0.48	0.18	0.34	0.35	-1.03	-0.42	-0.89	0.04	-1.4	1.75	1.25	0.46	CG33302	CG33302	CG33302	||CG33302||CG4791||	NA	3R	NA	molecular function|structural constituent of cuticle (sensu Insecta)|ISS|GO:0005214|Proteome|11002423//
								CG12794	1.44	0.39	0.46	0.42	-0.29	-0.48	-0.9	0	-1.09	1.9	1.45	0.68	CG12794	la costa	lcs	||CG12794||lcs||leader sequence, collagen-related repetitive motif and a serine/threonine-rich motif||	33120	X	20A1	biological process|biological_process unknown|ND|GO:0000004|Proteome|11002423//molecular function|molecular_function unknown|ND|GO:0005554|Proteome|11002423//cellular component|cellular_component unknown|ND|GO:0008372|Proteome|11002423//
								CG3344	0.72	0.18	0.44	0.33	-0.3	-0.54	-0.6	-0.19	-0.94	1.65	1.44	0.32	CG3344	CG3344	CG3344	||CG3344||	38083	3L	61C8	biological process|proteolysis and peptidolysis|NAS|GO:0006508|Proteome|11002423//biological process|proteolysis and peptidolysis|NAS|GO:0006508|Proteome|11002423//molecular function|serine carboxypeptidase activity|NAS|GO:0004185|Proteome|11002423//molec
								CG8952	0.47	0.25	0.26	0.11	-0.09	-0.29	-0.5	0.01	-0.63	0.82	0.8	0.16	CG8952	CG8952	CG8952	||SP52||CG8952||	32525	X	1.3e+15	molecular function|chymotrypsin activity|NAS|GO:0004263|Proteome|11002423//molecular function|trypsin activity|IEA|GO:0004295|Proteome|11002423//molecular function|serine-type endopeptidase activity|ISS|GO:0004252|Proteome|11002423//biological process|pro
								CG4563	0.96	0.02	0.17	0.33	-0.79	-0.27	-1.05	0.01	-1.24	2.73	1.82	0.39	CG4563	CG4563	CG4563	||CG4563||	37901	2R	60D1	biological process|metabolism|IEA|GO:0008152|Proteome|11002423//molecular function|ligase activity|IEA|GO:0016874|Proteome|11002423//molecular function|4-coumarate-CoA ligase activity|ISS|GO:0016207|Proteome|11002423//
								CG15441	0.64	0.23	0.17	0.05	-0.42	-0.07	-0.76	-0.28	-0.62	1.2	0.73	0.15	CG15441	GS1-like	Gs1l	||GS1like||CG15441||GS1-like||GS1-like protein||Gs1l||GS1l||	33653	2L	24F3	biological process|metabolism|IEA|GO:0008152|Proteome|11002423//molecular function|glutamate-ammonia ligase activity|NAS|GO:0004356|Proteome|11002423//molecular function|hydrolase activity|IEA|GO:0016787|Proteome|11002423//
								CG8098	1	0.42	0.48	-0.05	-0.73	-0.49	-1.26	-0.06	-1.01	1.92	1.43	0.15	CG8098	Picot	Picot	||CG8098||picot||Picot||	36865	2R	53C10-53C11	biological process|phosphate metabolism|IEA|GO:0006796|Proteome|11002423//biological process|cation transport|IEA|GO:0006812|Proteome|11002423//biological process|extracellular transport|IEA|GO:0006858|Proteome|11002423//molecular function|phosphate trans
								CG5254	0.66	0.16	0.24	0.25	-0.84	-0.47	-1.23	-0.25	-0.84	1.37	1.28	0.52	CG5254	CG5254	CG5254	||CG5254||EG:BACR19J1.2||CT16777||	31020	X	1C4	molecular function|binding|TAS|GO:0005488|Proteome|11002423//cellular component|mitochondrial inner membrane|ISS|GO:0005743|Proteome|11002423//biological process|lipid metabolism|IEA|GO:0006629|Proteome|11002423//biological process|lipid transport|IEA|GO:
								CG17145	1.19	0.35	0.45	0.2	-1.09	-0.35	-1.09	-0.17	-1.26	1.93	1.89	0.88	CG17145	CG17145	CG17145	||CG17145||	40215	3L	77A2	cellular component|extracellular|ISS|GO:0005576|Proteome|11002423//biological process|chitin metabolism|IEA|GO:0006030|Proteome|11002423//molecular function|chitin binding|IEA|GO:0008061|Proteome|11002423//molecular function|structural constituent of peri
								CG4472	0.79	0.2	0.68	0.54	-1.18	-0.39	-1.31	-0.06	-0.97	2.28	1.92	0.74	CG4472	Imaginal disc growth factor 1	Idgf1	||Imaginal disc growth factor1||IDGF-1||IDGF||idgf1||Idgf1||IDGF1||CG4472||BG:DS02780.5||	34978	2L	36A1	molecular function|chitinase activity|IDA|GO:0004568|Proteome|11002423//cellular component|extracellular|ISS|GO:0005576|Proteome|11002423//biological process|imaginal disc development|IMP|GO:0007444|Proteome|11002423//molecular function|imaginal disc grow
								CG15444	1.05	0.08	0.38	0.26	-0.6	-0.76	-0.42	-0.27	-1.28	1.24	1.26	0.22	CG15444	inebriated	ine	||ine/rosA||ine||CG15444||rosA||	33659	2L	24F4	cellular component|integral to plasma membrane|NAS|GO:0005887|Proteome|11002423//biological process|ion transport|IEA|GO:0006811|Proteome|11002423//biological process|neurotransmitter transport|NAS|GO:0006836|Proteome|11002423//biological process|extracel
								CG15653	1.23	0.41	0.55	0.24	-1.06	-1	-0.28	-0.19	-1.23	1.31	1.62	0.45	CG15653	CG15653	CG15653	NA	37388	NA	57B16	NA
								CG7876	1.64	0.54	0.29	0.71	-1.76	-0.69	-0.89	-0.05	-1.38	2.18	2.05	0.8	CG7876	CG7876	CG7876	||CG7876||	32913	X	18B1	cellular component|extracellular|ISS|GO:0005576|Proteome|11002423//biological process|chitin metabolism|IEA|GO:0006030|Proteome|11002423//molecular function|chitin binding|IEA|GO:0008061|Proteome|11002423//
								CG9675	1.49	0.55	0.47	0.48	-0.92	-0.32	-0.53	-0.22	-1.35	1.77	1.72	0.44	CG9675	CG9675	CG9675	||SPH114||anon-EST:ParkEST153||anon-WO0140519.154||CG9675||	32648	NA	15A1-15A2	molecular function|serine-type endopeptidase activity|ISS|GO:0004252|Proteome|11002423//molecular function|chymotrypsin activity|NAS|GO:0004263|Proteome|11002423//molecular function|trypsin activity|IEA|GO:0004295|Proteome|11002423//biological process|pro
								CG12233	0.71	0.22	0.12	0.06	-0.59	-0.35	-0.46	-0.39	-0.69	0.81	0.83	0.25	CG12233	lethal (1) G0156	l(1)G0156	||l(1)G0156||CG12233||FBgn0031024||	32940	X	18C8	biological process|amino acid biosynthesis|IEA|GO:0008652|Proteome|11002423//molecular function|isocitrate dehydrogenase (NAD+) activity|ISS|GO:0004449|Proteome|11002423//molecular function|isocitrate dehydrogenase (NAD+) activity|ISS|GO:0004449|Proteome|
								CG16704	1.34	0.24	0.68	-0.1	-0.89	-0.78	-1.61	-0.37	-1.63	1.72	2.05	0.57	CG16704	CG16704	CG16704	||CT37177||CG16704||BcDNA:RH31195||	33589	2L	24B1	molecular function|transporter activity|IEA|GO:0005215|Proteome|11002423//cellular component|extracellular|ISS|GO:0005576|Proteome|11002423//biological process|transport|IEA|GO:0006810|Proteome|11002423//molecular function|serine-type endopeptidase inhibi
								CG33192	1.9	-0.03	1.19	0.31	-1.86	-0.61	-1.27	-0.34	-2.24	1.88	1.71	0.77	CG33192	Metallothionein D	MtnD	NA	326270	3R	92F1	NA
								CG31039	2.02	-0.29	0.9	0.49	-1.18	-0.47	-1.25	0.02	-1.74	1.86	2.01	0.76	CG31039	Jonah 99Ci	Jon99Ci	||Jon99C&agr;i||Jonah 99C Beta||Jon99C&bgr;i||Ser99Dc||Jon99Ci||serine protease||JonC||CG31039||Jonah 99C Alpha||Jon99C1||Jon99C2||99C&agr;||CG17951||Jon99C&agr;||Jon99C&bgr;||SP150||Jon99B||Serine protease 3||Jon99C||SER3||Ser3||	43545	3R	99C7	molecular function|chymotrypsin activity|NAS|GO:0004263|Proteome|11002423//molecular function|trypsin activity|IEA|GO:0004295|Proteome|11002423//molecular function|serine-type endopeptidase activity|ISS|GO:0004252|Proteome|11002423//molecular function|ser
								CG9555	1.42	0.23	0.44	0.26	-1.21	-0.07	-0.88	-0.18	-1.09	1.39	1.51	0.63	CG9555	CG9555	CG9555	||CG9555||	34223	2L	29F7	biological process|development|IEA|GO:0007275|Proteome|11002423//biological process|mesoderm development|NAS|GO:0007498|Proteome|11002423//biological process|muscle development|NAS|GO:0007517|Proteome|11002423//
								CG12057	2.58	0.09	1.11	0.03	-1.62	-0.9	-1.21	-0.19	-1.76	1.41	2.24	0.96	CG12057	CG12057	CG12057	NA	31854	X	8D8	NA
								CG15423	2.42	0.43	0.77	0.11	-1.4	-0.73	-1.13	-0.42	-1.64	1.81	2.15	0.91	CG15423	CG15423	CG15423	NA	33616	NA	24D3	NA
								CG32495	1	0.27	0.19	-0.03	-0.6	-0.78	-0.64	0.08	-1.14	1.09	1.13	0.13	CG32495	CG32495	CG32495	||CG32495||	318053	NA	16F1	molecular function|catalytic activity|IEA|GO:0003824|Proteome|11002423//molecular function|ATP binding|IEA|GO:0005524|Proteome|11002423//biological process|protein biosynthesis|IEA|GO:0006412|Proteome|11002423//molecular function|ligase activity|IEA|GO:00
								CG32241	2	-0.12	0.64	0.02	-1.01	-0.9	-1.2	-0.23	-2.43	2.46	1.86	0.02	CG32241	CG32241	CG32241	||CG32241||	317934	NA	64B6	biological process|biological_process unknown|ND|GO:0000004|Proteome|11002423//molecular function|molecular_function unknown|ND|GO:0005554|Proteome|11002423//cellular component|cellular_component unknown|ND|GO:0008372|Proteome|11002423//
								CG10725	2.08	0.93	0.6	0.3	-1.35	-0.71	-1.24	-0.15	-2.02	2.25	2.03	0.61	CG10725	CG10725	CG10725	||CG10725||	39510	3L	70B1	cellular component|extracellular|ISS|GO:0005576|Proteome|11002423//biological process|chitin metabolism|IEA|GO:0006030|Proteome|11002423//molecular function|chitin binding|IEA|GO:0008061|Proteome|11002423//molecular function|structural constituent of peri
								CG7290	2.5	0.53	0.67	-0.08	-1.56	-0.74	-1.23	0.03	-2.62	2.64	1.94	0.44	CG7290	CG7290	CG7290	||CG7290||	40211	3L	77A2	cellular component|extracellular|ISS|GO:0005576|Proteome|11002423//biological process|chitin metabolism|IEA|GO:0006030|Proteome|11002423//molecular function|chitin binding|IEA|GO:0008061|Proteome|11002423//molecular function|structural constituent of peri
								CG16749	1.61	-0.06	0.57	0.2	-0.98	-0.75	-1.28	-0.12	-1.46	1.63	1.11	0.27	CG16749	CG16749	CG16749	||SP91||CG16749||	41111	3R	85D11	molecular function|chymotrypsin activity|NAS|GO:0004263|Proteome|11002423//molecular function|trypsin activity|IEA|GO:0004295|Proteome|11002423//molecular function|serine-type endopeptidase activity|ISS|GO:0004252|Proteome|11002423//molecular function|ser
								CG9757	1.27	0.25	0.41	0.02	-1.12	-0.73	-1.25	-0.19	-1.29	1.47	1.49	0.31	CG9757	CG9757	CG9757	NA	41662	3R	87F4	NA
								CG1468	1.26	0.14	0.39	0.01	-0.95	-0.61	-1.14	-0.37	-1.62	1.95	1.44	0.55	CG1468	CG1468	CG1468	NA	31920	NA	9A3	NA
								CG33128	1.76	0.17	0.45	0.03	-1.52	-1.08	-1.43	-0.28	-1.94	2.57	1.87	0.51	CG33128	CG33128	CG33128	||CG33128||CG10872||	326263	2L	22A2	molecular function|NOT aspartic-type endopeptidase activity|IEA|GO:0004190|Proteome|11002423//molecular function||IEA|GO:0004194|Proteome|11002423//biological process|proteolysis and peptidolysis|NAS|GO:0006508|Proteome|11002423//
								CG13772	1.04	0.77	0.19	0.15	0.02	-0.37	-0.57	-0.19	-1.13	0.92	0.51	-0.3	CG13772	neuroligin	neuroligin	||neuroligin||CG13772||	33962	2L	27C3-27C4	molecular function|NOT carboxylesterase activity|NAS|GO:0004091|Proteome|11002423//molecular function|receptor binding|IEA|GO:0005102|Proteome|11002423//biological process|ectoderm development|IEA|GO:0007398|Proteome|11002423//biological process|neurogene
								CG2045	0.64	0.53	0.19	0.21	-0.04	-0.2	-0.44	-0.12	-0.84	0.58	0.16	-0.54	CG2045	Ser7	Ser7	||SP#2||Ser7||Serine Protease 2||SP2||CG2045||SP3||c-SP3||	31917	X	9A2	molecular function|cysteine-type endopeptidase activity|IEA|GO:0004197|Proteome|11002423//molecular function|chymotrypsin activity|NAS|GO:0004263|Proteome|11002423//molecular function|serine-type endopeptidase activity|ISS|GO:0004252|Proteome|11002423//mo
								CG2239	0.3	0.21	0.36	0.1	-0.22	-0.21	-0.6	-0.23	-0.59	0.58	0.59	-0.31	CG2239	jdp	jdp	||p25a||dJDP||CG2239||jdp||	43630	3R	99F7	biological process|protein folding|IEA|GO:0006457|Proteome|11002423//molecular function|unfolded protein binding|IEA|GO:0051082|Proteome|11002423//
								CG31676	0.58	0.44	0.68	0.28	0.05	-0.29	-0.45	-0.27	-1.07	0.86	0.69	-0.26	CG31676	CG31676	CG31676	NA	35351	2L	38F2	NA
								CG17907	0.73	0.08	0.31	-0.11	-0.18	-0.74	-1.15	-0.45	-1.76	0.18	0.4	-0.02	CG17907	Acetylcholine esterase	Ace	||CHE||ache||AchE||AChE||dmAChE||DmAChE||CG17907||FBgn0000024||AcChE||dAChE||l(3)87Ed||l(3)26||ACE||Ace||ace||acetylcholinesterase||	41625	3R	87E2-87E3	cellular component|cytoplasm|IEA|GO:0005737|Proteome|11002423//cellular component|plasma membrane|ISS|GO:0005886|Proteome|11002423//biological process||IEA|GO:0001507|Proteome|11002423//biological process|neurotransmitter secretion|NAS|GO:0007269|Proteome
								CG10353	0.49	0.39	0.46	-0.04	-0.59	-0.53	-1.08	-0.48	-2.44	0.73	0.75	-0.67	CG10353	CG10353	CG10353	NA	32148	X	10F2-10F4	NA
								CG31839	0.83	0.43	0.47	0.37	0.29	-0.75	-1.06	0.23	-2.82	0.81	0.86	-0.44	CG31839	CG31839	CG31839	||BG:DS00180.7||CG31839||CG16882||CT37470||DS00180.7||	260645	2L	3400000	molecular function|receptor binding|IEA|GO:0005102|Proteome|11002423//molecular function|structural molecule activity|ISS|GO:0005198|Proteome|11002423//biological process|cell-matrix adhesion|IEA|GO:0007160|Proteome|11002423//biological process|signal tra
								CG3850	0.31	0.47	0.64	0.36	-0.05	-0.96	-0.71	-0.09	-1.6	0.8	0.69	-0.06	CG3850	sugarbabe	sug	||CG3850||sug||	36424	2R	490	molecular function|nucleic acid binding|IEA|GO:0003676|Proteome|11002423//cellular component|nucleus|IEA|GO:0005634|Proteome|11002423//biological process|nucleobase, nucleoside, nucleotide and nucleic acid metabolism|IEA|GO:0006139|Proteome|11002423//biol
								CG14770	1.1	0.24	0.32	0.71	-0.5	-0.64	-0.63	-0.27	-1.08	0.74	0.46	-1.15	CG14770	CG14770	CG14770	NA	31085	NA	2A1	NA
								CG14359	0.98	0.39	0.45	0.62	-0.55	-0.11	-0.31	-0.24	-1.24	0.82	0.14	-0.37	CG14359	CG14359	CG14359	NA	50032	3R	88A10	NA
								CG8927	1.12	0.49	0.3	0.49	-0.52	-0.45	-0.27	-0.24	-1.16	0.33	0.3	-0.4	CG8927	CG8927	CG8927	NA	41964	3R	89B6-89B7	NA
								CG7758	0.56	0.45	0.09	0.29	-0.5	-0.46	-0.4	-0.03	-0.56	0.5	0.88	-0.27	CG7758	pumpless	ppl	||l(3)00217||ppl||l(3)78Cb||CG7758||	40349	NA	78C4	molecular function|hydrolase activity|IEA|GO:0016787|Proteome|11002423//cellular component|mitochondrion|ISS|GO:0005739|Proteome|11002423//cellular component|mitochondrion|ISS|GO:0005739|Proteome|11002423//cellular component|glycine cleavage complex|ISS|G
								CG8200	0.23	0.23	-0.06	0.07	-0.31	-0.49	-0.33	0.02	-0.61	0.32	0.61	-0.41	CG8200	flotillin	Flo	||Flo||CK02126||reggie-2||FLO1||flotillin-1||Flotillin-1||CG8200||Flo<up>Dm</up>||FLO<up>Dm</up>||	36726	2R	52A13	molecular function|receptor binding|IEA|GO:0005102|Proteome|11002423//biological process|ectoderm development|IEA|GO:0007398|Proteome|11002423//biological process|neurogenesis|IEP|GO:0007399|Proteome|11002423//cellular component|integral to membrane|NAS|G
								CG13868	0.81	1.28	0.57	1.03	-2.33	-1.82	-1.33	-0.35	-1.64	0.09	0.55	-0.77	CG13868	CG13868	CG13868	NA	37302	2R	56F16	NA
								CG10106	0.85	0.56	0.05	0.27	-1.12	-0.95	-0.92	-0.22	-0.72	0.02	0.59	-0.79	CG10106	Tetraspanin 42Ee	Tsp42Ee	||BcDNA:LD16071||CG10106||tetraspanin 42E||Dm.Tsp42Ee||anon-WO0118547.151||Tsp42Ee||	35614	2R	4200000	cellular component|integral to membrane|NAS|GO:0016021|Proteome|11002423//
								CG12384	1.54	0.63	0.88	0.55	-1.72	-1.58	-1.8	0.02	-0.94	-0.15	0.35	-0.84	CG12384	CG12384	CG12384	||BcDNA:RH17411||CG12384||BcDNA:GH16986||	36224	2R	47F5	biological process|apoptosis|IEA|GO:0006915|Proteome|11002423//biological process|induction of apoptosis|TAS|GO:0006917|Proteome|11002423//biological process|signal transduction|IEA|GO:0007165|Proteome|11002423//biological process|cell surface receptor li
								CG8732	0.91	0.58	0.39	0.04	-1.36	-0.73	-1.41	-0.19	-0.96	0.06	0.41	-0.54	CG8732	lethal (2) 44DEa	l(2)44DEa	||l(2)44DEa||anon-WO0172774.173||l(2)7447||l(2)k05304||7447||l(2)05847||Fatty acyl-CoA synthetase||Fatty acyl CoA synthetase||CG8732||	46068	NA	44E1-44E2	biological process|fatty acid metabolism|IEA|GO:0006631|Proteome|11002423//molecular function|acetate-CoA ligase activity|ISS|GO:0003987|Proteome|11002423//
								CG33124	0.92	0.84	0.13	0.37	-1.38	-1.32	-0.93	-0.29	-0.48	-0.06	0.89	-0.33	CG33124	CG33124	CG33124	||CG10879||CG33124||	318891	NA	22D4	biological process|coenzyme metabolism|IEA|GO:0006732|Proteome|11002423//biological process|cation transport|IEA|GO:0006812|Proteome|11002423//biological process|extracellular transport|IEA|GO:0006858|Proteome|11002423//molecular function|cation transport
								CG8759	1.16	0.88	-0.24	0.59	-1.38	-1.36	-1.01	0.24	-0.8	0.47	0.67	-0.41	CG8759	NA	NA	NA	192347	NA	NA	NA
								CG8160	1.03	1.38	0.72	0.53	-1.65	-0.62	-1.08	-0.12	-1.7	0.53	1.66	0.39	CG8160	CG8160	CG8160	NA	36701	2R	51F6-51F7	NA
								CG30005	0.61	0.64	0.86	0.17	-1.24	-0.81	-0.41	-0.29	-0.59	0.61	0.8	0.09	CG30005	CG30005	CG30005	NA	246386	NA	45F6	NA
								CG13947	0.95	0.5	0.41	0.75	-1.29	-1	-0.66	-0.22	-0.6	0.12	1.04	0.75	CG13947	CG13947	CG13947	NA	33250	NA	2100	NA
								CG14265	1.07	0.7	0.72	0.39	-1.65	-1.33	-1.08	-0.56	-1.05	0.73	1.61	0.6	CG14265	CG14265	CG14265	NA	31297	X	3C10	NA
								CG33467	0.89	0.72	0.57	0.3	-0.06	-0.53	-0.99	-0.19	-1.12	0.29	1.01	0.02	CG33467	NA	NA	NA	192347	NA	NA	NA
								CG18358	0.66	0.34	0.24	0.56	-0.31	-0.56	-0.94	-0.43	-1.25	0.23	0.85	-0.34	CG18358	CG18358	CG18358	NA	32656	X	15A3	NA
								CG8222	0.65	0.49	0.28	0.43	-0.54	-0.6	-0.88	-0.28	-1.39	0.11	0.99	-0.11	CG8222	PDGF- and VEGF-receptor related	Pvr	||vgr1||Vgr1||VGR1||VEGFR-A||Vegfr-b||Vegfr-c||Vascular endothelial growth factor receptor-1 like||DmVEGFR||VEGF receptor||stai||CT24332||stasis||pvr||Pvr||PVR||CG8222||VEGFR||Vegfr||	34127	2L	28F3-28F5	molecular function|ATP binding|IEA|GO:0005524|Proteome|11002423//biological process|transmembrane receptor protein tyrosine kinase signaling pathway|IEA|GO:0007169|Proteome|11002423//biological process|ectoderm development|IEA|GO:0007398|Proteome|11002423
								CG31901	1.77	0.6	0.74	0.68	-0.89	-0.55	-0.6	-0.38	-0.7	0.3	0.26	-0.38	CG31901	CG31901	CG31901	||CG31901||BcDNA:LP08232||	319014	2L	29B1	biological process|biological_process unknown|ND|GO:0000004|Proteome|11002423//molecular function|molecular_function unknown|ND|GO:0005554|Proteome|11002423//cellular component|cellular_component unknown|ND|GO:0008372|Proteome|11002423//
								CG14235	1.13	0.98	1.01	0.28	-0.62	-1.04	-0.69	-0.06	-0.69	0	0.28	-0.51	CG14235	CG14235	CG14235	||Cytochrome c oxidase subunitVIb||CG14235||	32989	NA	1800000	biological process|electron transport|IEA|GO:0006118|Proteome|11002423//biological process|electron transport|IEA|GO:0006118|Proteome|11002423//biological process|oxidative phosphorylation|ISS|GO:0006119|Proteome|11002423//molecular function|cytochrome-c
								CG4760	0.7	0.43	0.57	0.2	-0.09	-0.71	-0.4	-0.08	-0.33	0.04	0.19	-0.34	CG4760	boule	bol	||CG4760||BcDNA:AT13332||bol||ms(3)07272||CG4727||Boule||	39049	3L	66F5-66F6	cellular component|nucleus|IEA|GO:0005634|Proteome|11002423//cellular component|cytoplasm|IEA|GO:0005737|Proteome|11002423//biological process|regulation of translation|TAS|GO:0006445|Proteome|11002423//molecular function|mRNA binding|ISS|GO:0003729|Prote
								CG10082	0.7	0.43	0.17	0.27	-0.04	-0.38	-0.35	-0.05	-0.38	0.05	0.02	-0.16	CG10082	CG10082	CG10082	||CG10082||anon-WO0172774.149||	37465	2R	57F6	biological process|phosphate metabolism|IEA|GO:0006796|Proteome|11002423//biological process|transport|IEA|GO:0006810|Proteome|11002423//biological process|phosphate transport|IEA|GO:0006817|Proteome|11002423//molecular function|inositol-trisphosphate 3-k
								CG1088	2.13	1.46	0.82	0.53	-0.52	-1.02	-1.34	-0.34	-0.9	0.29	0.72	-0.38	CG1088	NA	NA	||V-ATPase||VhaE||BcDNA:GH03683||vha26||Vha26||anon-83Bb||BcDNA.GH03683||CG1088||E subunit||	40679	3R	83B4	biological process||IEA|GO:0015986|Proteome|11002423//cellular component||IEA|GO:0016469|Proteome|11002423//molecular function||IEA|GO:0046933|Proteome|11002423//molecular function||IEA|GO:0046961|Proteome|11002423//cellular component|hydrogen-transportin
								CG30497	1.72	1.4	0.68	0.81	-0.89	-1.05	-1.03	-0.49	-0.96	0.29	0.64	-0.45	CG30497	CG30497	CG30497	NA	246653	2R	43E13-43E16	NA
								CG14724	1.06	0.61	1.11	0.44	-0.63	-0.73	-0.13	-0.18	-1.04	0.51	0.55	-0.08	CG14724	Cytochrome c oxidase subunit Va	CoVa	||CoVa||l(3)S011041||COX||CG14724||cytochrome c oxidase subunit Va||Va||l(3)S011046||	41432	3R	86F9	molecular function|cytochrome-c oxidase activity|NAS|GO:0004129|Proteome|11002423//molecular function|cytochrome-c oxidase activity|NAS|GO:0004129|Proteome|11002423//cellular component|respiratory chain complex IV (sensu Eukarya)|NAS|GO:0005751|Proteome|1
								CG31764	0.84	-0.05	0.17	0.58	-0.33	-0.62	-1.04	0.16	-1.56	0.53	0.9	0.23	CG31764	virus-induced RNA 1	vir-1	NA	192569	NA	33E3-33E4	NA
								CG3027	0.13	0.24	0.36	0.38	-0.81	-0.54	-0.42	-0.09	-1.35	0.64	1.04	0.01	CG3027	pyd3	pyd3	||pyd3||CG3027||	40916	3R	84D14	biological process|pyrimidine base metabolism|IEA|GO:0006206|Proteome|11002423//biological process|nitrogen metabolism|IEA|GO:0006807|Proteome|11002423//molecular function|beta-ureidopropionase activity|NAS|GO:0003837|Proteome|11002423//molecular function
								CG8694	0.35	0.67	0.38	0.38	-0.89	-0.26	-0.41	-0.03	-1.23	0.55	1.15	-0.09	CG8694	Larval visceral protein D	LvpD	||hdl cuticle gene cluster.||D||CG8694||LvpD||maltase||	35825	2R	44D1	molecular function|alpha-amylase activity|IEA|GO:0004556|Proteome|11002423//molecular function|alpha-glucosidase activity|NAS|GO:0004558|Proteome|11002423//molecular function|alpha-glucosidase activity|NAS|GO:0004558|Proteome|11002423//molecular function|
								CG3263	0.52	0.69	-0.02	0.1	-0.59	-0.35	-0.44	-0.16	-1.22	0.52	0.81	-0.17	CG3263	cAMP-dependent protein kinase R1	Pka-R1	||18304||Pka-RI||PKA-RI||CdkR||dPKA-RI||Pka-R1||pka-R1||PKAr||CG18677||CG3263||dr<down>1</down>||RI||pkA||PKA||PKC||DRI||	40306	NA	77E8-77F1	molecular function|receptor signaling protein serine/threonine kinase activity|IEA|GO:0004702|Proteome|11002423//biological process|protein amino acid phosphorylation|ISS|GO:0006468|Proteome|11002423//biological process|protein amino acid phosphorylation|
								CG31082	0.42	0.57	0.21	0.19	-0.55	-0.53	-0.42	0.02	-1.68	0.84	0.79	-0.08	CG31082	CG31082	CG31082	||CG31082||	318587	NA	97C1	biological process|biological_process unknown|ND|GO:0000004|Proteome|11002423//molecular function|molecular_function unknown|ND|GO:0005554|Proteome|11002423//cellular component|cellular_component unknown|ND|GO:0008372|Proteome|11002423//
								CG13722	0.56	0.88	0.05	0.59	-1.24	-0.46	-0.7	-0.49	-2.05	1.15	0.97	-0.01	CG13722	CG13722	CG13722	NA	38555	3L	64B8	NA
								CG8740	0.14	0.56	0.18	0.52	-0.68	-0.2	-0.36	-0.19	-1.57	0.68	0.77	-0.04	CG8740	CG8740	CG8740	NA	35866	2R	44E3-44E4	NA
								CG5793	0.42	-0.28	0.26	0.41	-0.61	-0.61	-1.07	-0.14	-1.31	0.96	0.85	-0.18	CG5793	CG5793	CG5793	||CG5793||	42505	3R	93C1	biological process|amino acid metabolism|IEA|GO:0006520|Proteome|11002423//biological process|amino acid catabolism|IEA|GO:0009063|Proteome|11002423//molecular function|lyase activity|IEA|GO:0016829|Proteome|11002423//molecular function|carboxy-lyase acti
								CG10302	0.49	0.13	0.14	0.31	-0.18	-0.63	-0.37	0.08	-0.76	0.77	0.67	0.08	CG10302	bicoid stability factor	bsf	||CG10302||bsf||	35100	2L	36F5	molecular function|mRNA 3'-UTR binding|IDA|GO:0003730|Proteome|11002423//cellular component|cytoplasm|IEA|GO:0005737|Proteome|11002423//molecular function|oxidoreductase activity|IEA|GO:0016491|Proteome|11002423//molecular function|mRNA 3'-UTR binding|IDA
								CG6030	0.93	0.22	0.16	0.18	-0.39	-0.43	-0.14	-0.11	-0.78	1	0.47	0.22	CG6030	ATP synthase	ATPsyn-d	||ATPsyn-d||CG6030||ATP synthase chain D||ATPase synthase, subunit d||	42291	3R	91F1	biological process||IEA|GO:0015986|Proteome|11002423//molecular function||IEA|GO:0046933|Proteome|11002423//molecular function||IEA|GO:0046961|Proteome|11002423//cellular component|proton-transporting ATP synthase complex, coupling factor F(o) (sensu Euka
								CG17109	1.22	0.17	0.21	0.64	-0.64	-1.15	-1.5	-0.02	-2.58	2.73	1.28	-0.23	CG17109	CG17109	CG17109	||CG17109||	42730	3R	94D13	molecular function|NOT aminoacylase activity|NAS|GO:0004046|Proteome|11002423//biological process|proteolysis and peptidolysis|NAS|GO:0006508|Proteome|11002423//molecular function|metallopeptidase activity|IEA|GO:0008237|Proteome|11002423//
								CG3699	1.47	0.17	0.57	0.5	-0.89	-1.16	-1.25	-0.39	-3.02	2.56	1.27	-0.05	CG3699	CG3699	CG3699	||CT12411||EG:BACR7A4.14||CG3699||	31046	X	1D3	biological process|metabolism|IEA|GO:0008152|Proteome|11002423//molecular function|oxidoreductase activity, acting on CH-OH group of donors|IEA|GO:0016614|Proteome|11002423//
								CG4562	1.21	0.23	0.31	0.26	-0.44	-1	-1.29	-0.11	-2.37	1.78	0.93	0.25	CG4562	CG4562	CG4562	||CG4562||CT14766||	42362	3R	92B4	molecular function|nucleotide binding|IEA|GO:0000166|Proteome|11002423//molecular function|ATP binding|IEA|GO:0005524|Proteome|11002423//biological process|extracellular transport|IEA|GO:0006858|Proteome|11002423//biological process|defense response|IEA|G
								CG32072	2.44	0.42	0.21	0.77	-1.29	-0.76	-1.47	0.19	-2.1	2.77	1.48	0.78	CG32072	NA	NA	NA	192347	NA	NA	NA
								CG6835	1.21	0.07	0.21	0.45	-0.44	-0.71	-0.61	-0.01	-1.27	1.4	0.65	0.09	CG6835	Glutathione Synthetase	GS	||CG6835||GS||CG33065||CG32497||	32775	X	16F1	molecular function|ATP binding|IEA|GO:0005524|Proteome|11002423//biological process|protein biosynthesis|IEA|GO:0006412|Proteome|11002423//biological process|glutathione biosynthesis|IEA|GO:0006750|Proteome|11002423//molecular function|glutathione synthas
								CG15096	1.07	0.32	0.3	0.23	-1.08	-1.96	-1.53	-0.03	-1.35	1	1.57	0.02	CG15096	CG15096	CG15096	||CT42567||CG15096||	37170	2R	55F5	biological process|carbohydrate metabolism|IEA|GO:0005975|Proteome|11002423//biological process|phosphate metabolism|IEA|GO:0006796|Proteome|11002423//biological process|cation transport|IEA|GO:0006812|Proteome|11002423//biological process|phosphate trans
								CG33126	0.32	0.05	0.06	-0.06	-0.41	-0.75	-0.95	-0.06	-0.73	0.57	0.71	-0.16	CG33126	Neural Lazarillo	NLaz	||CG16933||CG33126||NLaz||CT33980||BcDNA:RE67583||	33324	2L	22A1	cellular component|extracellular space|IEA|GO:0005615|Proteome|11002423//molecular function|carrier activity|IEA|GO:0005386|Proteome|11002423//biological process|lipid metabolism|IEA|GO:0006629|Proteome|11002423//biological process|lipid transport|IEA|GO:
								CG8913	0.31	-0.07	0	0.13	-0.63	-0.75	-0.84	-0.19	-0.79	0.58	1	-0.08	CG8913	CG8913	CG8913	||Peroxidase||CG8913||	42049	3R	89E7-89E8	biological process|oxygen and reactive oxygen species metabolism|NAS|GO:0006800|Proteome|11002423//biological process|defense response|IEA|GO:0006952|Proteome|11002423//molecular function|peroxidase activity|ISS|GO:0004601|Proteome|11002423//
								CG12116	1.94	0.28	0.39	0.05	-0.36	-1.32	-1.49	-0.04	-1.87	1.44	1.65	0.78	CG12116	CG12116	CG12116	||CG12116||	31782	X	7F1	molecular function|sepiapterin reductase activity|ISS|GO:0004757|Proteome|11002423//
								CG8946	1.33	-0.03	0.26	0.04	-0.22	-0.56	-1.08	0.01	-1.12	0.74	0.71	-0.05	CG8946	Sphingosine-1-phosphate lyase	Sply	||CG8946||Sply||sphingosine-1-phosphate lyase||anon-WO0142479.5||l(2)05091||SPL||Spl||spl||	46059	2R	53F8	molecular function|sphinganine-1-phosphate aldolase activity|NAS|GO:0008117|Proteome|11002423//biological process|amino acid metabolism|IEA|GO:0006520|Proteome|11002423//biological process|phospholipid metabolism|IEA|GO:0006644|Proteome|11002423//molecula
								CG3819	2.82	0	0.58	0.3	-1.53	-1.34	-1.61	-0.25	-1.89	1.57	1.41	0.34	CG3819	CG3819	CG3819	NA	40069	3L	75000000	NA
								CG11581	0.79	0	0.2	0.01	-0.41	-0.77	-0.53	-0.04	-0.62	0.71	0.64	-0.05	CG11581	CG11581	CG11581	NA	32362	NA	1200	NA
								CG11739	1.39	0.11	0.1	0.29	-0.47	-1.07	-1.03	-0.22	-1.07	0.87	1.21	-0.37	CG11739	CG11739	CG11739	||anon-EST:Posey55||CG11739||	40552	3R	82A5-82A6	biological process|cation transport|IEA|GO:0006812|Proteome|11002423//cellular component|membrane|IEA|GO:0016020|Proteome|11002423//molecular function|tricarboxylate carrier activity|ISS|GO:0005371|Proteome|11002423//
								CG11910	1.94	0.6	0.48	-0.05	-0.57	-1.07	-1.49	-0.16	-2.49	0.98	0.93	-0.89	CG11910	CG11910	CG11910	||CT37074||CG11910||	43074	NA	96D2-96D3	molecular function|G-protein coupled receptor activity|IEA|GO:0004930|Proteome|11002423//biological process|defense response|IEA|GO:0006952|Proteome|11002423//biological process|cell adhesion|NAS|GO:0007155|Proteome|11002423//biological process|cell surfa
								CG12845	1.14	0.25	0.46	-0.1	-0.19	-0.23	-0.8	-0.3	-1.35	0.61	0.81	-0.25	CG12845	Tetraspanin 42Ef	Tsp42Ef	||Tsp42Ef||tetraspanin 42E||CG12845||Dm.Tsp42Ef||	35615	2R	4200000	cellular component|integral to membrane|NAS|GO:0016021|Proteome|11002423//
								CG15152	0.55	-0.07	0.62	0.29	-0.48	-0.74	-0.51	-0.07	-1.61	0.98	1.09	0.01	CG15152	CG15152	CG15152	NA	35082	2L	3600000	NA
								CG40306	1.24	-0.39	0.41	0.09	-0.96	-1.01	-1.16	-0.28	-2.02	0.63	0.9	-0.58	CG40306
								CG4486	1.54	0.43	2.07	0.89	-0.78	-1.09	-1.66	-0.29	-2.51	1.38	1.77	0.06	CG4486	Cytochrome P450-9b2	Cyp9b2	||CG4486||P450||cyp9b2||Cyp9b2||fly plexin a||9b2||P-450||BEST:GH08116||	35635	2R	42F3	molecular function||IEA|GO:0004497|Proteome|11002423//biological process|electron transport|IEA|GO:0006118|Proteome|11002423//molecular function|oxidoreductase activity|IEA|GO:0016491|Proteome|11002423//molecular function|electron transporter activity|IEA
								CG18522	1.51	0.16	0.58	0.72	-0.39	-0.44	-0.93	-0.12	-1.86	1.07	1.18	0.06	CG18522	CG18522	CG18522	||CT42272||DmAO1||CG18522||	41894	3R	88F7	molecular function|electron transporter activity|IEA|GO:0005489|Proteome|11002423//biological process|electron transport|IEA|GO:0006118|Proteome|11002423//biological process|nucleobase, nucleoside, nucleotide and nucleic acid metabolism|IEA|GO:0006139|Pro
								CG5261	1.36	0.35	0.88	0.58	-0.59	-0.58	-1.06	0.02	-1.09	0.51	0.96	0.15	CG5261	CG5261	CG5261	||CG5261||anon-WO0118547.121||	34021	2L	27F6	molecular function|protein binding|IEA|GO:0005515|Proteome|11002423//biological process|glycolysis|IEA|GO:0006096|Proteome|11002423//biological process|tricarboxylic acid cycle|ISS|GO:0006099|Proteome|11002423//molecular function|dihydrolipoyllysine-resid
								CG7936	2.01	0.39	1.14	0.93	-0.92	-0.94	-1.65	-0.24	-2.35	0.96	1.55	-0.25	CG7936	midgut expression 1	mex1	||mex1||CG7936||	39677	3L	71D4	biological process|midgut development|TAS|GO:0007494|Proteome|11002423//biological process|embryonic development|NAS|GO:0009790|Proteome|11002423//
								CG9468	2.25	-0.08	0.28	0.05	-1.85	-1.64	-1.57	-0.21	-4.42	2.45	1.81	-0.69	CG9468	CG9468	CG9468	||CG9468||	34206	2L	29F1	biological process|carbohydrate metabolism|IEA|GO:0005975|Proteome|11002423//biological process|carbohydrate metabolism|IEA|GO:0005975|Proteome|11002423//molecular function|hydrolase activity, hydrolyzing N-glycosyl compounds|IEA|GO:0016799|Proteome|11002
								CG15730	1.42	0.38	0.05	0.62	-1.27	-0.97	-0.82	0	-1.25	0.7	0.75	-0.26	CG15730	CG15730	CG15730	NA	32200	X	11A12	NA
								CG10472	2.43	1.26	0.42	0.49	-2.21	-1.06	-1.21	-0.42	-2.03	1.66	1.73	0.08	CG10472	CG10472	CG10472	||CG10472||SP78||anon-WO0140519.101||	38688	3L	65A5	molecular function|trypsin activity|IEA|GO:0004295|Proteome|11002423//molecular function|serine-type endopeptidase activity|ISS|GO:0004252|Proteome|11002423//molecular function|chymotrypsin activity|NAS|GO:0004263|Proteome|11002423//biological process|pro
								CG1803	1.51	1.08	0.33	0.49	-1.55	-0.62	-0.91	0.01	-1.9	1.7	1.64	0.24	CG1803	regucalcin	regucalcin	||T1||regucalcin||CG1803||	32165	NA	11A1	biological process|anterior/posterior axis specification|IEA|GO:0009948|Proteome|11002423//biological process|calcium-mediated signaling|TAS|GO:0019722|Proteome|11002423//
								CG13545	1.71	0.59	0.17	0.56	-1.53	-0.87	-1.05	0.01	-1.67	0.68	1.27	0.51	CG13545	CG13545	CG13545	NA	37675	NA	59D1	NA
								CG3523	2.45	0.32	0.02	0.42	-1.91	-1.12	-1.53	-0.3	-2.26	1.31	1.18	0.28	CG3523	CG3523	CG3523	||Fatty acid synthase||anon-WO0138581.1||Fatty acid synthetase||anon-EST:Posey235||DM_7295848||BcDNA:gh07626||BcDNA:GH07626||anon-EST:Posey43||CG3523||	33524	2L	23D1	molecular function||IEA|GO:0004024|Proteome|11002423//biological process|fatty acid biosynthesis|IEA|GO:0006633|Proteome|11002423//biological process|fatty acid biosynthesis|IEA|GO:0006633|Proteome|11002423//molecular function|zinc ion binding|IEA|GO:0008
								CG6947	2.08	0.47	0.02	0.4	-2.02	-1.2	-1.05	-0.14	-2.73	1.14	1.59	0.28	CG6947	CG6947	CG6947	||CG6947||	39360	3L	680000	cellular component|extracellular|ISS|GO:0005576|Proteome|11002423//biological process|chitin metabolism|IEA|GO:0006030|Proteome|11002423//molecular function|chitin binding|IEA|GO:0008061|Proteome|11002423//molecular function|structural constituent of peri
								CG9155	2.37	0.87	0.62	0.61	-2.58	-1.32	-1.41	-0.32	-3.04	1.48	1.75	-0.01	CG9155	Myosin 61F	Myo61F	||MYOIB||Myo61F||MYO61F||myosin I||Myo1B||myosin IB||Myosin IB||IB||myosin61F||myosin 61F||Myo-IB||myosin 1b||myosin-IB||Myosin-IB||MIB||DmIB||Dm IB||DroMIB||CG9155||	38153	3L	61F6	molecular function|structural constituent of cytoskeleton|IEA|GO:0005200|Proteome|11002423//molecular function|ATP binding|IEA|GO:0005524|Proteome|11002423//biological process|intracellular protein transport|IEA|GO:0006886|Proteome|11002423//biological pr
								CG1865	0.82	0.48	0.53	0.38	-1.16	-0.44	-1.11	-0.1	-1.22	0.65	1.34	0.1	CG1865	Serine protease inhibitor 43Ab	Spn43Ab	||Spn43Ab||Serine protease inhibitor 2||Ser2||SER2||anon-WO0118057.2||CG1865||	45040	2R	43A1	biological process|proteolysis and peptidolysis|NAS|GO:0006508|Proteome|11002423//molecular function|serine-type endopeptidase inhibitor activity|IEA|GO:0004867|Proteome|11002423//
								CG33178	0.86	0.54	0.44	0.79	-1.11	-0.72	-1.41	-0.38	-2.39	1.38	1.41	-0.04	CG33178	CG33178	CG33178	||CG33178||CG5579||BcDNA:RH14671||	318913	X	13A9	biological process|protein modification|IEA|GO:0006464|Proteome|11002423//biological process|defense response|IEA|GO:0006952|Proteome|11002423//biological process|response to toxin|IEA|GO:0009636|Proteome|11002423//molecular function|transferase activity|
								CG10311	0.73	0.48	0.54	0.34	-0.97	-0.57	-1.58	-0.32	-1.89	1.09	1.6	0.02	CG10311	CG10311	CG10311	NA	41984	3R	89B13	NA
								CG14933	0.55	0.65	0.71	0.5	-0.7	-0.48	-1.19	-0.2	-1.16	1.18	1.21	0.05	CG14933	CG14933	CG14933	NA	50442	2L	33A3	NA
								CG17524	0.79	0.68	0.77	0.51	-0.65	-0.79	-1.49	-0.38	-1.77	1.34	1.36	0.04	CG17524
								CG1809	1.2	0.54	0.89	0.69	-1.27	-0.58	-1.21	-0.36	-1.88	1.56	1.61	0.34	CG1809	CG1809	CG1809	||CG1809||	35981	2R	45F3	biological process|skeletal development|IEA|GO:0001501|Proteome|11002423//biological process|mesoderm development|NAS|GO:0007498|Proteome|11002423//biological process|metabolism|IEA|GO:0008152|Proteome|11002423//molecular function|nucleotide phosphatase a
								CG9379	0.97	0.48	0.46	0.48	-0.88	-0.37	-1.18	-0.36	-1.12	0.95	1.11	-0.03	CG9379	blistery	by	||tensin||CT26639||BcDNA:RE65113||by||3R-B||CG9379||	41144	3R	85D22	molecular function|structural constituent of cytoskeleton|IEA|GO:0005200|Proteome|11002423//biological process|intracellular signaling cascade|IEA|GO:0007242|Proteome|11002423//biological process|mesoderm development|NAS|GO:0007498|Proteome|11002423//biol
								CG7296	1.5	0.39	0.89	0.01	-1.62	-1.78	-1.21	-0.02	-2.17	1.23	1.97	0.45	CG7296	CG7296	CG7296	NA	34469	2L	32A4	NA
								CG11911	0.75	0.25	0.26	0.11	-0.95	-0.88	-0.66	-0.22	-0.85	0.63	1.16	0.37	CG11911	CG11911	CG11911	||SP103||CG11911||	33206	2L	21C1	molecular function|trypsin activity|IEA|GO:0004295|Proteome|11002423//molecular function|serine-type endopeptidase activity|ISS|GO:0004252|Proteome|11002423//molecular function|chymotrypsin activity|NAS|GO:0004263|Proteome|11002423//biological process|pro
								CG17146	1.51	0.2	0.61	0.4	-1.6	-1.21	-1.45	-0.24	-1.48	1.16	1.91	0.58	CG17146	Adenylate kinase-1	Adk1	||DAK1||Adk1||bs34e10.y1||CG17146||AK1||ADK-1||	39396	3L	69A2	molecular function|ATP binding|IEA|GO:0005524|Proteome|11002423//cellular component|cytoplasm|IEA|GO:0005737|Proteome|11002423//biological process|purine base metabolism|IEA|GO:0006144|Proteome|11002423//biological process|pyrimidine base metabolism|IEA|G
								CG33127	1.17	-0.1	0.36	0.19	-0.76	-0.9	-1.02	-0.18	-1.49	1.22	1.6	-0.06	CG33127	CG33127	CG33127	||CG33127||	318893	NA	21C1	molecular function|chymotrypsin activity|NAS|GO:0004263|Proteome|11002423//biological process|proteolysis and peptidolysis|NAS|GO:0006508|Proteome|11002423//molecular function|peptidase activity|NAS|GO:0008233|Proteome|11002423//molecular function|serine-
								CG9836	0.58	-0.03	0.47	0.54	-0.67	-0.77	-0.68	0.07	-1.24	0.65	1.1	0.01	CG9836	CG9836	CG9836	||CG9836||	41059	3R	85B2	biological process|nitrogen metabolism|IEA|GO:0006807|Proteome|11002423//biological process|nitrogen utilization|IEA|GO:0019740|Proteome|11002423//
								CG16743	1.34	0.45	0.49	0.52	-0.98	-0.67	-1.17	-0.24	-1.31	1.29	1.74	0.18	CG16743	CG16743	CG16743	NA	34517	2L	32C1	NA
								CG6852	1	0.22	0.18	0.49	-0.57	-0.66	-0.55	-0.1	-0.88	0.89	1.25	0.18	CG6852	CG6852	CG6852	NA	40053	3L	7500	NA
								CG12963	0.55	0.11	0.21	0.48	-0.56	-0.34	-0.76	-0.17	-0.66	0.62	0.86	0.21	CG12963	CG12963	CG12963	NA	36724	2R	52A11-52A12	NA
								CG9674	0.88	0.1	0.34	0.54	-0.7	-0.75	-1.11	0	-1.18	0.61	1.31	0.22	CG9674	CG9674	CG9674	||CG9674||	39878	3L	73C4-73C5	molecular function||IEA|GO:0004497|Proteome|11002423//biological process|carbohydrate metabolism|IEA|GO:0005975|Proteome|11002423//biological process|electron transport|IEA|GO:0006118|Proteome|11002423//biological process|glutamate biosynthesis|NAS|GO:000
								CG8256	1.64	0.8	0.67	0.64	-0.82	-1.36	-0.88	-0.27	-2.69	1.11	1.71	0.3	CG8256	lethal (2) k05713	l(2)k05713	||mitochondrial GPD||CG18786||l(2)k05713||anon-WO0118547.114||CG8256||	47611	2R	52C8	molecular function|glycerol-3-phosphate dehydrogenase activity|ISS|GO:0004368|Proteome|11002423//molecular function|glycerol-3-phosphate dehydrogenase activity|ISS|GO:0004368|Proteome|11002423//cellular component|mitochondrion|ISS|GO:0005739|Proteome|1100
								CG8342	2.28	0.25	1.1	0.93	-1.78	-1.84	-1.47	-0.49	-2.84	2.28	1.53	0.59	CG8342	E(spl) region transcript m1	m1	||E(spl)-m1||BcDNA:RE44854||E(spl)m1||CG8342||m1||	43154	3R	96F10	molecular function|serine-type endopeptidase inhibitor activity|IEA|GO:0004867|Proteome|11002423//
								CG17549	1.56	-0.05	0.74	0.77	-1	-0.76	-1.24	-0.05	-2.09	1.77	1.54	0.31	CG17549	CG17549	CG17549	NA	35212	2L	37D4	NA
								CG17836	1.43	0	0.41	0.86	-1.18	-0.8	-1.36	-0.33	-2.28	1.09	1.56	0	CG17836	CG17836	CG17836	||clone 2.44||CG17836||anon-EST:Liang-2.44||	42267	3R	91D4-91D5	molecular function|DNA binding|ISS|GO:0003677|Proteome|11002423//cellular component|nucleus|IEA|GO:0005634|Proteome|11002423//biological process|regulation of transcription, DNA-dependent|ISS|GO:0006355|Proteome|11002423//biological process||IMP|GO:005087
								CG7390	1.57	0.17	0.23	0.03	-1.21	-0.83	-1.16	-0.24	-2.64	1.67	1.26	0.49	CG7390	Senescence marker protein-30	smp-30	||smp-30||Smp-30||Dca||Drosophila cold acclimation gene||CG7390||CT22723||	41786	3R	88D2	molecular function|calcium ion binding|IEA|GO:0005509|Proteome|11002423//biological process|electron transport|IEA|GO:0006118|Proteome|11002423//biological process|signal transduction|IEA|GO:0007165|Proteome|11002423//biological process|intracellular sign
								CG11413	1.3	0.02	0.25	0.46	-1.16	-1.06	-0.91	-0.18	-2.35	1.61	1.69	0.49	CG11413	CG11413	CG11413	NA	37920	2R	60D4	NA
								CG32483	0.74	-0.09	0.38	-0.07	-0.73	-0.33	-0.99	-0.25	-1.24	0.86	0.97	0.19	CG32483	CG32483	CG32483	||CG32483||	318050	3L	61C8	biological process|proteolysis and peptidolysis|NAS|GO:0006508|Proteome|11002423//molecular function|peptidase activity|NAS|GO:0008233|Proteome|11002423//molecular function|serine-type peptidase activity|IEA|GO:0008236|Proteome|11002423//biological proces
								CG6514	0.89	-0.07	0.4	0.28	-1.32	-0.75	-0.97	-0.26	-2.31	1.39	1.44	0.22	CG6514	TpnC25D	TpnC25D	||TpnC25D||DmTpnCII||DmTpnC25D||CG6514||anon-EST:Posey103||BcDNA:RE53289||TnC||TpnC II||	33752	2L	25D1	biological process||IEA|GO:0001539|Proteome|11002423//molecular function|calmodulin binding|TAS|GO:0005516|Proteome|11002423//biological process|muscle contraction|IEA|GO:0006936|Proteome|11002423//cellular component||IEA|GO:0009288|Proteome|11002423//bio
								CG7874	1.42	0.01	0.91	0.3	-1.36	-1.11	-1.48	-0.18	-2.6	1.29	1.74	0.78	CG7874	CG7874	CG7874	NA	32912	X	18B1	NA
								CG9538	1.28	-0.12	0.62	0.35	-1.42	-0.89	-1.62	-0.32	-2.62	1.52	1.6	0.48	CG9538	Antigen 5-related	Ag5r	||antigen 5-related||agr||Agr||CG9538||anon-WO0140519.74||Agr5||Ag5r||	44631	X	12F4	biological process|defense response|IEA|GO:0006952|Proteome|11002423//cellular component|extracellular|ISS|GO:0005576|Proteome|11002423//
								CG3168	2.3	0.53	0.46	0.42	-1.2	-0.48	-1.4	-0.49	-2.59	1.5	1.29	0.08	CG3168	CG3168	CG3168	||LP06294.5prime||BEST:LP06294||CG3168||	31612	X	6C9-6C10	molecular function|DNA binding|ISS|GO:0003677|Proteome|11002423//molecular function|DNA topoisomerase (ATP-hydrolyzing) activity|NAS|GO:0003918|Proteome|11002423//molecular function|transporter activity|IEA|GO:0005215|Proteome|11002423//molecular function
								CG14120	1.85	0.75	0.22	0.23	-0.98	-0.71	-1.21	-0.5	-2.07	1.11	1.28	-0.36	CG14120	CG14120	CG14120	NA	39463	3L	6900000000	NA
								CG8790	1.8	0.83	0.54	0.23	-0.8	-0.85	-0.97	-0.36	-1.99	1.03	1.48	-0.41	CG8790	CG8790	CG8790	||CG8790||BcDNA:GH02431||	41640	3R	8700000000	molecular function|binding|TAS|GO:0005488|Proteome|11002423//biological process|transport|IEA|GO:0006810|Proteome|11002423//biological process|transport|IEA|GO:0006810|Proteome|11002423//molecular function|dicarboxylic acid transporter activity|ISS|GO:000
								CG9140	0.92	0.36	0.12	0.23	-0.63	-0.97	-0.59	0.11	-1.07	0.5	0.8	0.02	CG9140	CG9140	CG9140	||CG9140||	33852	2L	26B6-26B7	molecular function|NADH dehydrogenase activity|ISS|GO:0003954|Proteome|11002423//cellular component|respiratory chain complex I (sensu Eukarya)|ISS|GO:0005747|Proteome|11002423//cellular component|respiratory chain complex I (sensu Eukarya)|ISS|GO:0005747
								CG5730	0.94	0.3	0.87	0.49	-0.79	-0.84	-0.91	-0.21	-1.35	0.58	0.76	-0.15	CG5730	Annexin IX	AnnIX	||CG5730||AnxB9||Ann||AnnIX||	42492	3R	93B9-93B10	biological process|lipid metabolism|IEA|GO:0006629|Proteome|11002423//biological process||IEA|GO:0050819|Proteome|11002423//molecular function|actin binding|NAS|GO:0003779|Proteome|11002423//molecular function|calcium ion binding|IEA|GO:0005509|Proteome|1
								CG5958	2.41	0.9	1.28	0.53	-1.37	-2.27	-1.86	-0.02	-3.18	1.04	1.3	-0.32	CG5958	CG5958	CG5958	||CG5958||	34022	2L	27F6	molecular function|carrier activity|IEA|GO:0005386|Proteome|11002423//cellular component|intracellular|IEA|GO:0005622|Proteome|11002423//biological process|coenzyme metabolism|IEA|GO:0006732|Proteome|11002423//biological process|transport|IEA|GO:0006810|P
								CG30035	1.78	0.22	0.96	0.31	-1.56	-1.45	-1.21	-0.12	-2.41	0.55	1.06	-0.24	CG30035	CG30035	CG30035	||CG7797||CG7801||CG30035||	36248	2R	48B6-48B7	molecular function|sugar porter activity|IEA|GO:0005351|Proteome|11002423//biological process|carbohydrate metabolism|IEA|GO:0005975|Proteome|11002423//molecular function|glucose transporter activity|ISS|GO:0005355|Proteome|11002423//biological process|ca
								CG4869	1.61	0.53	1.15	0.76	-2.17	-2.08	-1.82	0	-2.89	1.08	1.44	-0.27	CG4869	NA	NA	NA	192347	NA	NA	NA
								CG13102	1.3	0.04	0.78	0.16	-1.16	-1.45	-1.31	-0.02	-2.67	2.09	0.99	-0.43	CG13102	CG13102	CG13102	NA	34228	NA	29F7	NA
								CG4559	1.23	-0.11	0.69	0.52	-1.22	-1.03	-1.13	0	-2.3	1.65	0.6	-0.53	CG4559	Imaginal disc growth factor 3	Idgf3	||CG4559||IDGF-3||IDGF||BG:DS02780.2||idgf3||Idgf3||IDGF3||	34981	2L	36A1	molecular function|chitinase activity|IDA|GO:0004568|Proteome|11002423//cellular component|extracellular|ISS|GO:0005576|Proteome|11002423//biological process|imaginal disc development|IMP|GO:0007444|Proteome|11002423//molecular function|imaginal disc grow
								CG1732	1.63	0.19	0.43	0.68	-1.19	-1.28	-1.68	-0.46	-2.56	1.82	0.83	-0.58	CG1732	CG1732	CG1732	||anon-WO0149848.11||CG1732||	43805	4	102C2	cellular component|integral to plasma membrane|NAS|GO:0005887|Proteome|11002423//biological process|amino acid metabolism|IEA|GO:0006520|Proteome|11002423//biological process|ion transport|IEA|GO:0006811|Proteome|11002423//biological process|neurotransmit
								CG4019	1.95	0.27	1.02	0.95	-1.97	-2	-1.78	-0.33	-3.07	2.14	1.23	-0.28	CG4019	CG4019	CG4019	||CG4019||	37739	2R	59F4	molecular function|carrier activity|IEA|GO:0005386|Proteome|11002423//biological process|transport|IEA|GO:0006810|Proteome|11002423//biological process|transport|IEA|GO:0006810|Proteome|11002423//cellular component|membrane|IEA|GO:0016020|Proteome|1100242
								CG4239	0.82	0.23	0.08	0.16	-0.82	-0.46	-0.96	0.09	-1.43	0.73	0.77	-0.34	CG4239	CG4239	CG4239	NA	32606	X	14C2	NA
								CG12065	0.87	0.27	0.32	0.2	-0.97	-1.11	-1.25	-0.01	-1.73	0.81	0.91	-0.33	CG12065	CG12065	CG12065	NA	31798	X	7F5-7F7	NA
								CG7584	1.61	0.13	0.25	0.35	-1.21	-1.59	-2.05	-0.15	-3.13	2.07	1.6	-0.6	CG7584
								CG3734	1.02	0.37	0.6	0.3	-0.9	-0.67	-1.42	-0.17	-1.78	1.16	1.57	-0.49	CG3734	CG3734	CG3734	||CG3734||	42318	3R	92A3	biological process|proteolysis and peptidolysis|NAS|GO:0006508|Proteome|11002423//biological process|proteolysis and peptidolysis|NAS|GO:0006508|Proteome|11002423//molecular function|serine-type peptidase activity|IEA|GO:0008236|Proteome|11002423//
								CG3318	0.95	0.24	0.79	0.33	-0.57	-0.62	-1.24	-0.12	-1.86	1.28	1.09	0.1	CG3318	Dopamine N acetyltransferase	Dat	||AA-NAT1||NAT1||aaNat||aaNAT||aaNAT1||Aanat1||Arylalkylamine N-acetyltransferase-1||CG3318||Dat||Dat1||	37867	2R	60B12-60C1	molecular function|aralkylamine N-acetyltransferase activity|TAS|GO:0004059|Proteome|11002423//molecular function|arylamine N-acetyltransferase activity|IDA|GO:0004060|Proteome|11002423//biological process|catecholamine metabolism|IEA|GO:0006584|Proteome|
								CG12832	0.74	0.56	0.62	0.38	-0.69	-0.77	-0.86	-0.11	-1.77	1.13	1.26	0.09	CG12832	Tetraspanin 42Eq	Tsp42Eq	||Dm.Tsp42Eq||CG12832||Tsp42Eq||tetraspanin 42E||	35628	2R	42F1	cellular component|integral to membrane|NAS|GO:0016021|Proteome|11002423//
								CG6641	1.08	0.53	0.7	0.38	-0.54	-0.68	-0.97	-0.04	-2.19	1.22	1.66	0.08	CG6641	Pheromone-binding protein-related protein 5	Pbprp5	||pbprp-5||PBPRP-5||PB-PRP5||PBP5||pbprp5||Pbprp5||PBPRP5||28a||CG6641||Obp28a||	34031	2L	28A2	biological process|transport|IEA|GO:0006810|Proteome|11002423//biological process|metabolism|IEA|GO:0008152|Proteome|11002423//molecular function|oxidoreductase activity|IEA|GO:0016491|Proteome|11002423//molecular function|pheromone binding|NAS|GO:0005550
								CG10200	1.2	0.49	0.79	0.29	-1.25	-1.15	-1.26	-0.42	-2.8	1.63	1.63	-0.14	CG10200	CG10200	CG10200	NA	36648	2R	51C3-51C4	NA
								CG11378	1.59	1.06	1.12	0.64	-1.64	-1.39	-1.46	-0.13	-2.64	1.46	1.76	-0.08	CG11378	CG11378	CG11378	NA	31060	X	1000	NA
								CG32667	1.39	1.12	0.97	0.59	-1.2	-0.99	-1.65	-0.12	-2.61	1.64	1.42	-0.27	CG32667	CG32667	CG32667	||CG32667||	318146	X	10A7	biological process|biological_process unknown|ND|GO:0000004|Proteome|11002423//molecular function|molecular_function unknown|ND|GO:0005554|Proteome|11002423//cellular component|cellular_component unknown|ND|GO:0008372|Proteome|11002423//
								CG3694	1.23	0.55	0.75	0.24	-0.98	-0.86	-1.38	-0.29	-2.21	1.28	1.03	-0.38	CG3694	NA	NA	NA	192347	NA	NA	NA
								CG17633	1.77	0.3	0.84	0.26	-1.63	-1.06	-1.32	-0.28	-2.2	1.8	1.82	0.03	CG17633	CG17633	CG17633	||CG17633||	34297	2L	30C8	biological process|proteolysis and peptidolysis|NAS|GO:0006508|Proteome|11002423//biological process|proteolysis and peptidolysis|NAS|GO:0006508|Proteome|11002423//molecular function|carboxypeptidase A activity|IEA|GO:0004182|Proteome|11002423//
								CG13510	1.24	0.4	0.81	0.26	-1.13	-0.74	-0.8	-0.09	-1.99	1.34	1.3	-0.28	CG13510	CG13510	CG13510	NA	37596	2R	58F4	NA
								CG13279	1.32	0.67	0.79	0.15	-1	-0.67	-1.17	-0.23	-1.9	1.65	1.67	-0.22	CG13279	Cytochrome b5-related	Cyt-b5-r	||CG13279||TU-36B||Cytb||Cyt-b5-r||TU36B||Cyt-b5||Cytb5||Cyt-b||	35008	2L	36B1	cellular component|mitochondrion|ISS|GO:0005739|Proteome|11002423//molecular function|oxidoreductase activity|IEA|GO:0016491|Proteome|11002423//molecular function|electron transporter activity|IEA|GO:0005489|Proteome|11002423//
								CG8997	1.57	0.26	1.04	0.35	-1.4	-0.55	-1.42	-0.26	-2.52	1.72	2.05	-0.21	CG8997	CG8997	CG8997	||CT25774||BG:DS00941.12||CG8997||DS00941.12||	34799	2L	34D7	biological process|biological_process unknown|ND|GO:0000004|Proteome|11002423//molecular function|molecular_function unknown|ND|GO:0005554|Proteome|11002423//cellular component|cellular_component unknown|ND|GO:0008372|Proteome|11002423//
								CG17248	1.46	0.25	0.46	0.51	-1.1	-1.22	-0.67	-0.38	-1.79	1.05	0.81	-0.61	CG17248	n-synaptobrevin	n-syb	||CG17248||synaptobrevin||Syb62A||n-Syb||n-syb||Synaptobrevin-62A||Nsyb||nSYB||nsyb||Dn-syb||syb||SYB||N-synaptobrevin||	38196	3L	62A12	biological process|intracellular protein transport|IEA|GO:0006886|Proteome|11002423//biological process|exocytosis|IEA|GO:0006887|Proteome|11002423//molecular function|v-SNARE activity|ISS|GO:0005485|Proteome|11002423//cellular component|synaptic vesicle|
								CG13506	2.02	0.11	0.33	0.3	-1.02	-1.69	-1.04	-0.26	-2.01	1.25	0.74	-0.5	CG13506	CG13506	CG13506	NA	37556	2R	58D6-58D7	NA
								CG31198	2.31	0.04	0.66	0.34	-2.16	-1.86	-1.57	-0.54	-2.87	1.57	1.6	-0.29	CG31198	CG31198	CG31198	||CG5845||CG31198||anon-WO0140519.12||anon-WO0140519.24||	318622	3R	93F8-93F9	molecular function|membrane alanyl aminopeptidase activity|IEA|GO:0004179|Proteome|11002423//molecular function|receptor activity|IEA|GO:0004872|Proteome|11002423//biological process|proteolysis and peptidolysis|NAS|GO:0006508|Proteome|11002423//
								CG6014	2.09	0.12	0.48	0.35	-1.34	-1.53	-1.04	-0.48	-2.19	1.38	1.15	-0.17	CG6014	CG6014	CG6014	NA	40368	3L	78C9-78D1	NA
								CG3861	1.3	0.42	0.35	0.13	-1.29	-1.07	-0.81	-0.62	-1.78	0.74	0.92	-0.36	CG3861	lethal (1) G0030	l(1)G0030	||l(1)G0030||BEST:GM01832||l(1)G0033||l(1)G0159||CG3861||	45224	NA	5F2-5F3	molecular function|lyase activity|IEA|GO:0016829|Proteome|11002423//molecular function|citrate (Si)-synthase activity|ISS|GO:0004108|Proteome|11002423//molecular function|citrate (Si)-synthase activity|ISS|GO:0004108|Proteome|11002423//cellular component|
								CG13704	2.09	1.02	0.44	0.57	-1.65	-1.38	-1.19	-0.45	-2.85	1.47	1.27	-0.77	CG13704	CG13704	CG13704	NA	38588	3L	64C2	NA
								CG5700	2.19	1.06	0.47	0.69	-1.93	-1.79	-1.43	-0.51	-2.8	1.49	1.16	-0.2	CG5700	pericardin	prc	||CK01593||pericardin||Pericardin||Pc||prc||Prc||CG5700||BEST:CK01593||EC11||	43930	3L	68E3-68E4	cellular component|extracellular matrix|NAS|GO:0005578|Proteome|11002423//biological process|heart development|NAS|GO:0007507|Proteome|11002423//cellular component|basal lamina|NAS|GO:0005605|Proteome|11002423//biological process|morphogenesis of an epith
								CG6544	1.96	1.01	0.56	0.45	-1.84	-1.8	-1.29	-0.38	-2.33	1.03	1.01	-0.08	CG6544	fau	fau	||fau||Fau||BcDNA:HL07933||CG6544||	41291	3R	86C6	biological process|biological_process unknown|ND|GO:0000004|Proteome|11002423//molecular function|molecular_function unknown|ND|GO:0005554|Proteome|11002423//cellular component|cellular_component unknown|ND|GO:0008372|Proteome|11002423//
								CG12846	1.35	0.43	0.4	0.2	-1.2	-0.86	-0.97	-0.48	-2.56	1.22	0.93	-0.06	CG12846	Tetraspanin 42Ed	Tsp42Ed	||GH07074||BcDNA:GH07074||tetraspanin 42E||Dm.Tsp42Ed||Tsp42Ed||CG12846||	35613	2R	4200000	cellular component|integral to membrane|NAS|GO:0016021|Proteome|11002423//
								CG9119	1.59	0.17	0.31	0.27	-1.25	-0.83	-0.98	-0.17	-2.19	1.29	0.86	-0.2	CG9119	CG9119	CG9119	NA	38124	3L	61F3	NA
								CG2297	2.06	0.52	1.36	0.13	-1.73	-2.2	-1.71	-0.37	-3.01	1.96	1.76	0.39	CG2297	Obp44a	Obp44a	||Odorant-binding protein 44a||bs11e05.y1||anon-EST:ParkEST107||44a||Obp44a||CG2297||	35789	NA	44B5	molecular function|odorant binding|IEA|GO:0005549|Proteome|11002423//biological process|transport|IEA|GO:0006810|Proteome|11002423//
								CG12480	1.29	0.33	0.21	0.25	-1.86	-1.81	-1.51	-0.27	-2.95	1.22	1.78	-0.17	CG12480	CG12480	CG12480	NA	32359	X	1200	NA
								CG31233	1.72	0.37	0.76	0.55	-2.08	-2.52	-1.42	-0.51	-3.65	1.89	1.86	-0.24	CG31233	CG31233	CG31233	||anon-WO0140519.125||CG5839||anon-WO0140519.65||CG31233||	42557	3R	93F8	biological process|proteolysis and peptidolysis|NAS|GO:0006508|Proteome|11002423//biological process|proteolysis and peptidolysis|NAS|GO:0006508|Proteome|11002423//molecular function|membrane alanyl aminopeptidase activity|IEA|GO:0004179|Proteome|11002423
								CG3747	0.88	0.43	0.44	0.33	-1.08	-1.32	-0.95	-0.25	-1.65	1.05	1.08	0.04	CG3747	Excitatory amino acid transporter 1	Eaat1	||dEAAT1||glutamate transporter||Dglt-1||sodium-dependent excitatory amino acid transporter 1||AF001784||Drosophila glutamate transporter-1||EAAT||Eaat1||sodium-dependent glutamate transporter||sodium-excitatory-glutamate-cotransporter||Dglut-1||CG3747||	34251	2L	30A8	molecular function|L-glutamate transporter activity|IDA|GO:0005313|Proteome|11002423//biological process|amino acid metabolism|IEA|GO:0006520|Proteome|11002423//biological process|cation transport|IEA|GO:0006812|Proteome|11002423//biological process||IEA|
								CG30160	1.79	-0.41	0.67	0.42	-1.19	-1.52	-1.92	-0.16	-3.17	1.51	1.73	-0.3	CG30160	CG30160	CG30160	||CG30160||	246490	NA	4200000	cellular component|integral to membrane|NAS|GO:0016021|Proteome|11002423//cellular component|integral to membrane|NAS|GO:0016021|Proteome|11002423//
								CG8956	0.64	0.28	0.21	0.09	-0.54	-0.82	-0.96	0	-1.68	0.81	1	-0.09	CG8956	Adenosylhomocysteinase 89E	Ahcy89E	||pH200||S-adenosyl homocysteine hydrolase-like||Ahcy89E||AdoHcyase-like||S-AHCY||AHCY||CG8956||	42043	3R	8900000	biological process|purine base metabolism|IEA|GO:0006144|Proteome|11002423//biological process|one-carbon compound metabolism|NAS|GO:0006730|Proteome|11002423//molecular function|adenosylhomocysteinase activity|ISS|GO:0004013|Proteome|11002423//molecular
								CG31446	1.77	0.22	0.65	0.27	-0.71	-0.96	-1.18	-0.05	-2.59	1.41	1.28	-0.1	CG31446	CG31446	CG31446	||BcDNA:RE40372||CG31446||	318741	3R	89A2	biological process|biological_process unknown|ND|GO:0000004|Proteome|11002423//molecular function|molecular_function unknown|ND|GO:0005554|Proteome|11002423//cellular component|cellular_component unknown|ND|GO:0008372|Proteome|11002423//
								CG5853	1.67	0.32	0.2	0.36	-0.83	-1.2	-1.15	-0.3	-2.8	1.31	1.18	0.29	CG5853	CG5853	CG5853	||CG5853||	34322	2L	30F1-30F2	molecular function|nucleotide binding|IEA|GO:0000166|Proteome|11002423//molecular function|anion channel activity|IEA|GO:0005253|Proteome|11002423//molecular function|ATP binding|IEA|GO:0005524|Proteome|11002423//biological process|lipid metabolism|IEA|GO
								CG4726	1.63	-0.11	0.43	0.27	-0.94	-1.56	-0.87	-0.18	-2.65	1.13	1.37	-0.26	CG4726	CG4726	CG4726	||CG4726||	33292	2L	21F1	biological process|carbohydrate metabolism|IEA|GO:0005975|Proteome|11002423//biological process|phosphate metabolism|IEA|GO:0006796|Proteome|11002423//biological process|cation transport|IEA|GO:0006812|Proteome|11002423//biological process|phosphate trans
								CG11415	1.85	0.41	0.33	0.35	-0.8	-1.49	-1.08	-0.19	-2.83	1.13	1.26	-0.37	CG11415	Tetraspanin 2A	Tsp2A	||Dm.Tsp2A||D8.7||Tsp2A||CG11415||EG:8D8.7||	31080	X	1F4	cellular component|integral to membrane|NAS|GO:0016021|Proteome|11002423//
								CG7470	1.43	0.36	0.41	0.3	-0.74	-1.59	-1.27	0.03	-2.99	1.35	1.34	-0.09	CG7470	CG7470	CG7470	||CG7470||	40443	3L	79A6	molecular function|glutamate 5-kinase activity|ISS|GO:0004349|Proteome|11002423//molecular function|glutamate-5-semialdehyde dehydrogenase activity|ISS|GO:0004350|Proteome|11002423//cellular component|mitochondrion|ISS|GO:0005739|Proteome|11002423//cellul
								CG13492	1.51	0.28	0.49	0.44	-0.83	-1.56	-1.24	-0.26	-3.15	1.36	1.44	-0.25	CG13492	CG13492	CG13492	||CG13492||	37487	2R	58A2	molecular function|glyceraldehyde-3-phosphate dehydrogenase (phosphorylating) activity|NAS|GO:0004365|Proteome|11002423//biological process|glycolysis|IEA|GO:0006096|Proteome|11002423//
								CG9527	1.34	0.25	0.44	0.37	-0.85	-1.3	-1.29	-0.33	-2.73	1.17	1.32	-0.3	CG9527	CG9527	CG9527	||CG9527||	33898	2L	26D3-26D4	cellular component|peroxisome|NAS|GO:0005777|Proteome|11002423//biological process|electron transport|IEA|GO:0006118|Proteome|11002423//biological process|fatty acid beta-oxidation|ISS|GO:0006635|Proteome|11002423//biological process|fatty acid beta-oxida
								CG9494	2.13	0.82	0.96	0.99	-1.53	-1.17	-1.39	-0.38	-2.83	1.33	1.34	-0.02	CG9494	Tetraspanin 29Fa	Tsp29Fa	||Dm.Tsp29Fa||Tsp29Fa||CG9494||	34211	2L	29F4	molecular function|receptor binding|IEA|GO:0005102|Proteome|11002423//biological process|signal transduction|IEA|GO:0007165|Proteome|11002423//biological process|cell-cell adhesion|IEA|GO:0016337|Proteome|11002423//cellular component|integral to membrane|
								CG10242	1.75	0.91	0.33	0.82	-1.13	-1.29	-1.39	-0.3	-2.78	1.57	1.55	-0.19	CG10242	Cyp6a23	Cyp6a23	||Cyp6a23||CG10242||6a23||	36661	2R	51D1	molecular function||IEA|GO:0004497|Proteome|11002423//biological process|electron transport|IEA|GO:0006118|Proteome|11002423//biological process|steroid metabolism|IEA|GO:0008202|Proteome|11002423//molecular function|oxidoreductase activity|IEA|GO:0016491
								CG12602	1.46	0.87	0.39	0.58	-1.14	-0.82	-1.02	-0.26	-2.19	1.13	1.37	0.16	CG12602	CG12602	CG12602	||CG12602||	34587	2L	33A1	molecular function|copper ion binding|IEA|GO:0005507|Proteome|11002423//biological process|cation transport|IEA|GO:0006812|Proteome|11002423//biological process|proton transport|NAS|GO:0015992|Proteome|11002423//cellular component|hydrogen-transporting AT
								CG10806	1.15	0.33	0.44	0.42	-0.61	-0.76	-1.19	-0.08	-1.87	0.77	0.8	-0.05	CG10806	CG10806	CG10806	||serine protease||CG10806||	33961	2L	27C1	biological process|regulation of pH|IEA|GO:0006885|Proteome|11002423//molecular function||IEA|GO:0015299|Proteome|11002423//cellular component|integral to membrane|NAS|GO:0016021|Proteome|11002423//molecular function|hydrogen antiporter activity|NAS|GO:00
								CG31343	1.34	0.26	0.31	0.61	-0.99	-1.07	-1.35	-0.09	-2.25	1.3	1.35	-0.26	CG31343	CG31343	CG31343	||CG31343||CG5839||BEST:GH20248||anon-WO0140519.86||	326133	3R	93F8	biological process|proteolysis and peptidolysis|NAS|GO:0006508|Proteome|11002423//biological process|proteolysis and peptidolysis|NAS|GO:0006508|Proteome|11002423//molecular function|zinc ion binding|IEA|GO:0008270|Proteome|11002423//molecular function|me
								CG18493	1.84	0.57	0.6	0.47	-0.94	-1.15	-1.58	-0.22	-2.55	1.1	1.67	0.12	CG18493	CG18493	CG18493	||CG18493||	42319	3R	92A3	biological process|proteolysis and peptidolysis|NAS|GO:0006508|Proteome|11002423//biological process|proteolysis and peptidolysis|NAS|GO:0006508|Proteome|11002423//molecular function|peptidase activity|NAS|GO:0008233|Proteome|11002423//molecular function|
								CG7272	1.67	0.34	0.31	0.53	-0.98	-1.24	-1.4	-0.15	-2.13	1.17	1.48	0.08	CG7272	CG7272	CG7272	NA	39670	3L	71D3	NA
								CG13990	2.78	0.73	0.55	0.8	-2.19	-2.67	-1.65	-0.57	-3.47	1.49	2.07	0.33	CG13990	CG13990	CG13990	NA	50424	2L	26B11	NA
								CG6416	1.15	0.39	0.48	0.37	-0.87	-1.08	-1.07	-0.38	-1.66	0.8	0.96	0.03	CG6416	CG6416	CG6416	||anon-WO0153538.30||CG6416||	38988	3L	66D8-66D9	molecular function|protein binding|IEA|GO:0005515|Proteome|11002423//biological process|mesoderm development|NAS|GO:0007498|Proteome|11002423//
								CG8695	2.22	0.6	0.85	0.65	-1.68	-2.11	-1.5	-0.54	-3.15	1.58	1.9	0.06	CG8695	Larval visceral protein L	LvpL	||hdl cuticle gene cluster.||L||gene V||V||LvpL||CG8695||maltase||	35826	2R	44D1	molecular function|alpha-amylase activity|IEA|GO:0004556|Proteome|11002423//molecular function|transporter activity|IEA|GO:0005215|Proteome|11002423//molecular function|alpha-glucosidase activity|NAS|GO:0004558|Proteome|11002423//molecular function|alpha-
								CG15422	1.85	0.72	0.82	0.46	-1.46	-1.31	-1.08	-0.36	-2.44	1.65	1.55	0.25	CG15422	CG15422	CG15422	NA	33615	2L	24D3	NA
								CG10833	1.38	0.48	0.55	0.54	-1.04	-1.07	-1.07	-0.14	-2.14	1.24	1.22	0.28	CG10833	Cyp28d1	Cyp28d1	||CG10833||Cyp28d1||28d1||	33749	2L	25C10	molecular function||IEA|GO:0004497|Proteome|11002423//biological process|electron transport|IEA|GO:0006118|Proteome|11002423//biological process|steroid metabolism|IEA|GO:0008202|Proteome|11002423//molecular function|oxidoreductase activity|IEA|GO:0016491
								CG9673	2.02	0.57	0.65	0.38	-1.23	-1.41	-1.35	-0.14	-2.79	1.99	1.54	0.26	CG9673	CG9673	CG9673	||CG9673||SPH81||	32649	X	15A2-15A3	molecular function|serine-type endopeptidase activity|ISS|GO:0004252|Proteome|11002423//molecular function|chymotrypsin activity|NAS|GO:0004263|Proteome|11002423//molecular function|trypsin activity|IEA|GO:0004295|Proteome|11002423//biological process|pro
								CG1623	2.36	0.52	0.86	0.45	-1.56	-1.29	-1.43	-0.29	-2.55	1.1	1.6	-0.09	CG1623	CG1623	CG1623	NA	36011	2R	46B4	NA
								CG8579	2.83	0.32	1.36	0.22	-1.48	-2.07	-1.77	0.02	-3.16	1.65	2.08	0.39	CG8579	Jonah 44E	Jon44E	||Jon43E||SP100||Jonah 43E||Jon44E||CG8579||	35853	2R	4400	molecular function|trypsin activity|IEA|GO:0004295|Proteome|11002423//molecular function|chymotrypsin activity|NAS|GO:0004263|Proteome|11002423//molecular function|chymotrypsin activity|NAS|GO:0004263|Proteome|11002423//biological process|proteolysis and
								CG32302	3.45	0.37	0.9	0.42	-1.51	-2.03	-1.49	-0.11	-3.43	2.01	2.4	0.12	CG32302	CG32302	CG32302	||CG13805||CG32302||	38293	3L	62D5	cellular component|extracellular|ISS|GO:0005576|Proteome|11002423//biological process|chitin metabolism|IEA|GO:0006030|Proteome|11002423//molecular function|chitin binding|IEA|GO:0008061|Proteome|11002423//
								CG8562	2.23	0.26	0.51	0.39	-1.53	-1.97	-1.63	0.01	-3.14	1.54	1.31	0.04	CG8562	CG8562	CG8562	||CT15463||CG8562||	38828	3L	65F11	molecular function|carboxypeptidase A activity|IEA|GO:0004182|Proteome|11002423//biological process|proteolysis and peptidolysis|NAS|GO:0006508|Proteome|11002423//biological process|proteolysis and peptidolysis|NAS|GO:0006508|Proteome|11002423//molecular
								CG2233	3.25	0.77	0.66	0.49	-1.32	-1.88	-1.9	-0.09	-2.89	1.64	1.71	0.34	CG2233	CG2233	CG2233	NA	31721	X	7D3	NA
								CG5765	2.91	0.75	0.77	0.48	-1.61	-2.04	-1.81	-0.11	-3.2	1.81	1.72	0.15	CG5765	CG5765	CG5765	NA	37057	2R	55B2	NA
								CG1168	0.17	-0.11	0.24	-0.13	-0.68	-0.63	-0.95	0.02	-1.16	0.99	0.83	-0.19	CG1168	7B2	7B2	||CG1168||FBgn0040073||7B2||d7B2||	40644	3R	83A1	molecular function|neuropeptide hormone activity|ISS|GO:0005184|Proteome|11002423//biological process|signal transduction|IEA|GO:0007165|Proteome|11002423//biological process|neuropeptide signaling pathway|ISS|GO:0007218|Proteome|11002423//biological proc
								CG18410	0.33	0	0.11	0.13	-0.84	-0.66	-1.15	-0.06	-1.87	1.71	1	-0.7	CG18410	CG18410	CG18410	NA	42953	NA	96A22	NA
								CG1212	0.3	0.21	0.19	0.33	-0.18	-0.21	-0.19	0.01	-0.81	0.76	0.79	-0.24	CG1212	p130CAS	p130CAS	||CG1212||p130CAS||CT1293||	38021	3L	61B1-61B2	biological process|regulation of cell cycle|IEA|GO:0000074|Proteome|11002423//molecular function|structural constituent of cytoskeleton|IEA|GO:0005200|Proteome|11002423//molecular function|sugar porter activity|IEA|GO:0005351|Proteome|11002423//biological
								CG9065	0.52	0.42	0.51	0.46	-0.52	-0.58	-0.46	-0.07	-1.5	1.13	1.15	-0.28	CG9065	CG9065	CG9065	||CG9065||	32439	X	13A9	molecular function|copper ion binding|IEA|GO:0005507|Proteome|11002423//biological process|copper ion transport|IEA|GO:0006825|Proteome|11002423//cellular component|mitochondrial intermembrane space|ISS|GO:0005758|Proteome|11002423//cellular component|mit
								CG2157	0.42	0.49	0.58	0.63	-0.25	-0.61	-0.6	0.06	-1.85	1.09	0.83	-0.67	CG2157	CG2157	CG2157	NA	32018	X	9F5	NA
								CG9743	0.68	0.25	0.33	0.59	-0.39	-0.8	-0.6	-0.04	-1.91	1.44	0.74	-0.46	CG9743	CG9743	CG9743	||CG9743||anon-WO0118547.264||	43593	3R	9900	molecular function|iron ion binding|IEA|GO:0005506|Proteome|11002423//cellular component|endoplasmic reticulum|TAS|GO:0005783|Proteome|11002423//biological process|fatty acid metabolism|IEA|GO:0006631|Proteome|11002423//biological process|fatty acid biosy
								CG14968	0.66	-0.08	0.23	0.13	-0.59	-1.1	-0.97	0.15	-1.34	1.03	0.97	-0.39	CG14968	CG14968	CG14968	NA	38406	3L	63C5	NA
								CG2560	0.49	0.16	0.21	0.47	-1.09	-1.38	-1.3	-0.06	-2.23	2.28	1.63	-0.25	CG2560	CG2560	CG2560	||CG2560||	32198	X	11A11-11A12	molecular function|structural constituent of larval cuticle (sensu Insecta)|NAS|GO:0008010|Proteome|11002423//
								CG17032	0.6	0.12	0.08	0.08	-0.54	-1.03	-1	-0.22	-1.82	1.13	1.32	-0.27	CG17032	CG17032	CG17032	NA	39736	3L	72C1	NA
								CG15280	1.01	0.49	0.74	0.13	-0.71	-1.39	-1.2	-0.24	-2.23	1.77	1.19	-0.21	CG15280	NA	NA	NA	192347	NA	NA	NA
								CG31030	0.46	0.35	0.17	0.13	-0.7	-0.98	-0.69	0.11	-1.51	1.18	1.05	-0.48	CG31030	CG31030	CG31030	||anon-EST:Posey81||CG31030||CG2176||BcDNA:RH09162||	318563	3R	990	molecular function|copper, zinc superoxide dismutase activity|NAS|GO:0004785|Proteome|11002423//biological process|superoxide metabolism|NAS|GO:0006801|Proteome|11002423//molecular function|metal ion binding|NAS|GO:0046872|Proteome|11002423//
								CG4108	0.58	0.46	0.16	0.26	-0.32	-0.49	-0.7	-0.27	-1	0.78	0.82	-0.26	CG4108
								CG6174	0.48	0.3	0.47	0.59	-0.61	-0.67	-0.86	-0.39	-1.19	1.05	0.86	-0.42	CG6174	Actin-related protein 87C	Arp87C	||Arp-1||Arp||arp1||Arp1||ARP1||Arp87C||ARP87C||grid||gdl||Actr87C||CG6174||gridlock||	41566	NA	87C5	molecular function|motor activity|ISS|GO:0003774|Proteome|11002423//molecular function|actin binding|NAS|GO:0003779|Proteome|11002423//molecular function|structural constituent of cytoskeleton|IEA|GO:0005200|Proteome|11002423//cellular component|dynactin
								CG12023	0.61	0.34	0.39	0.26	-0.69	-0.9	-0.92	-0.18	-1.26	0.96	0.99	-0.51	CG12023	GV1	GV1	||CG12023||GV1||DIP1||BcDNA:RH49123||	170893	NA	62B4-62B6	molecular function|DNA binding|ISS|GO:0003677|Proteome|11002423//cellular component|nucleus|IEA|GO:0005634|Proteome|11002423//cellular component|nuclear membrane|IDA|GO:0005635|Proteome|11002423//biological process|biological_process unknown|ND|GO:0000004
								CG1941	0.74	0.51	0.43	0.4	-0.68	-0.91	-0.69	-0.23	-1.66	1.36	1.04	-0.74	CG1941	CG1941	CG1941	NA	35718	2R	43000000000000	NA
								CG30171	0.75	0.09	0.25	-0.03	-0.39	-1.19	-1.61	-0.15	-2.34	0.94	1.02	0.4	CG30171	NA	NA	NA	192347	NA	NA	NA
								CG3576	0.52	0.17	0.42	0.08	-0.34	-0.25	-0.57	0.03	-1.18	0.46	0.67	-0.24	CG3576	Longevity assurance gene 1	Lag1	||longevity||l(1)G0365||Lag1||lon||CG15898||DLAG1||Dlag1||l(1)G0489||l(1)G0061||CG3576||	50392	X	5E3-5E4	molecular function|DNA binding|ISS|GO:0003677|Proteome|11002423//molecular function|transcription factor activity|IEA|GO:0003700|Proteome|11002423//cellular component|nucleus|IEA|GO:0005634|Proteome|11002423//biological process|regulation of transcription
								CG9780	0.47	0.17	0.45	0.23	-0.42	-0.35	-0.91	-0.12	-1.44	0.48	0.88	-0.22	CG9780	CG9780	CG9780	NA	40540	3R	82A3	NA
								CG6126	0.73	0.12	0.33	0.54	-0.35	-0.79	-0.94	-0.17	-2.1	0.96	1.05	-0.04	CG6126	CG6126	CG6126	||CT19169||CG6126||	41967	3R	89B7	biological process|carbohydrate metabolism|IEA|GO:0005975|Proteome|11002423//biological process|cation transport|IEA|GO:0006812|Proteome|11002423//biological process|extracellular transport|IEA|GO:0006858|Proteome|11002423//biological process|carbohydrate
								CG8773	0.49	0.32	0.4	0.33	-0.67	-0.79	-1.39	-0.01	-2.75	1.11	1.07	0.02	CG8773	CG8773	CG8773	||CG8773||	41634	3R	870000	molecular function|membrane alanyl aminopeptidase activity|IEA|GO:0004179|Proteome|11002423//biological process|proteolysis and peptidolysis|NAS|GO:0006508|Proteome|11002423//biological process|proteolysis and peptidolysis|NAS|GO:0006508|Proteome|11002423
								CG11395	0.28	0.32	0.27	0.14	-0.55	-0.6	-0.42	0.22	-1.44	0.45	0.68	-0.47	CG11395	CG11395	CG11395	NA	36937	2R	54A1	NA
								CG7941	0.73	0.44	0.59	0.76	-1.85	-1.79	-1.13	-0.1	-3.37	1.5	0.93	-1.59	CG7941	CG7941	CG7941	||BcDNA:RE57116||CG7941||	39223	3L	67F1	molecular function|structural constituent of larval cuticle (sensu Insecta)|NAS|GO:0008010|Proteome|11002423//
								CG11961	0.64	0.54	0.54	0.57	-1.34	-1.53	-0.86	-0.2	-1.86	0.94	1.17	-0.71	CG11961	CG11961	CG11961	NA	37221	2R	56D1-56D2	NA
								CG10625	1.3	0.58	0.19	0.69	-1.84	-1.31	-0.86	-0.47	-2.56	1.37	1.12	-0.32	CG10625	CG10625	CG10625	NA	38624	3L	64D3	NA
								CG9564	0.97	0.57	0.48	0.68	-1.73	-1.45	-1.21	-0.08	-2.59	1.5	1.12	-0.66	CG9564	Trypsin 29F	Try29F	||try29F.2||try29F||Try29F||SP106||CG9564||	34226	NA	29F7	molecular function|chymotrypsin activity|NAS|GO:0004263|Proteome|11002423//molecular function|peptidase activity|NAS|GO:0008233|Proteome|11002423//molecular function|serine-type peptidase activity|IEA|GO:0008236|Proteome|11002423//molecular function|tryps
								CG10118	0.29	0.61	0.06	0.2	-1.32	-1.09	-0.83	-0.54	-1.79	0.58	1	-0.45	CG10118	pale	ple	||DTH||ple||Pale||CG10118||Tyrosine-3-hydroxylase||XBB70 Group VII||VII||tyrosine hydroxylase||Tyrosine Hydroxylase||DH65B||Th||TH||dTH65B||Drosophila tyrosine hydroxylase||	38746	3L	65C3	molecular function|iron ion binding|IEA|GO:0005506|Proteome|11002423//biological process|signal transduction|IEA|GO:0007165|Proteome|11002423//biological process|amino acid catabolism|IEA|GO:0009063|Proteome|11002423//biological process||IEA|GO:0009072|Pr
								CG11218	0.43	0.51	0.11	0.45	-1.87	-1.36	-1.53	-0.24	-2.65	1.44	1.61	-0.25	CG11218	Odorant-binding protein 56d	Obp56d	||Obp56d||OBP56d||BEST:GH09027||CT31326||BcDNA:RE22207||CG11218||56d||	37266	2R	5600	molecular function|odorant binding|IEA|GO:0005549|Proteome|11002423//biological process|transport|IEA|GO:0006810|Proteome|11002423//molecular function|odorant binding|IEA|GO:0005549|Proteome|11002423//cellular component|extracellular|ISS|GO:0005576|Proteo
								CG4962	0.11	0.62	0.28	0.34	-1.05	-1.04	-1.2	-0.23	-2.27	0.99	1.03	-0.25	CG4962	CG4962	CG4962	NA	39793	3L	720	NA
								CG14240	0.58	0.14	0.45	0.27	-0.23	-1.73	-1.09	-0.09	-2.99	1.09	1.15	-0.81	CG14240	CG14240	CG14240	NA	43201	3R	97C2	NA
								CG6415	0.95	0.65	0.03	0.45	-0.71	-0.96	-1.02	-0.12	-1.68	0.84	0.88	-0.93	CG6415	CG6415	CG6415	||anon-32Aa||CG6415||	34474	2L	32A4	molecular function|aminomethyltransferase activity|IEA|GO:0004047|Proteome|11002423//molecular function|aminomethyltransferase activity|IEA|GO:0004047|Proteome|11002423//cellular component|glycine cleavage complex|ISS|GO:0005960|Proteome|11002423//cellula
								CG14687	0.93	0.23	0.35	0.06	-0.49	-1.52	-1.03	-0.06	-2	0.57	1.3	-0.46	CG14687	CG14687	CG14687	NA	41297	3R	86C6	NA
								CG12030	0.57	0.14	0.24	0.15	-1.17	-1.31	-0.73	-0.02	-2.53	0.73	0.83	-0.72	CG12030	CG12030	CG12030	||CG12030||	38076	3L	61C8	biological process||IEA|GO:0009225|Proteome|11002423//molecular function|UDP-glucose 4-epimerase activity|ISS|GO:0003978|Proteome|11002423//molecular function|UDP-glucose 4-epimerase activity|ISS|GO:0003978|Proteome|11002423//biological process|galactose
								CG8630	0.92	0.26	0.56	0.04	-1.74	-1.76	-1.17	-0.31	-3.31	1.12	1.25	-0.34	CG8630	CG8630	CG8630	||CG8630||	41629	3R	87E3-87E4	molecular function|iron ion binding|IEA|GO:0005506|Proteome|11002423//cellular component|endoplasmic reticulum|TAS|GO:0005783|Proteome|11002423//biological process|fatty acid metabolism|IEA|GO:0006631|Proteome|11002423//biological process|fatty acid biosy
								CG10737	0.74	0.31	0.25	0.37	-0.82	-1.33	-1.39	-0.28	-1.87	0.51	0.8	-0.54	CG10737	CG10737	CG10737	||Gene 1||10737||CG10737||	37202	2R	56C1	biological process|intracellular signaling cascade|IEA|GO:0007242|Proteome|11002423//molecular function|diacylglycerol binding|ISS|GO:0019992|Proteome|11002423//
								CG10830	1.18	0.23	0.24	0.23	-1.12	-1.11	-1.69	-0.17	-2.47	0.9	0.92	-0.91	CG10830	CG10830	CG10830	||CG10830||	42475	3R	93A2	molecular function|voltage-gated potassium channel activity|IEA|GO:0005249|Proteome|11002423//molecular function|protein binding|IEA|GO:0005515|Proteome|11002423//biological process|potassium ion transport|IEA|GO:0006813|Proteome|11002423//cellular compon
								CG14994	1.3	0.46	0.06	0.59	-1.49	-1.37	-1.45	-0.53	-2.74	0.29	0.92	-0.79	CG14994	Glutamic acid decarboxylase 1	Gad1	||GAD<down>1</down>||dgad1||dGad1||DGad1||DGAD1||Glb||CG14994||l(3)64An||l(3)SH10||GAD||Gad||gad||gad1||Gad1||GAD1||	38484	3L	64A5	molecular function|glutamate decarboxylase activity|NAS|GO:0004351|Proteome|11002423//biological process|glutamate catabolism|IMP|GO:0006538|Proteome|11002423//biological process|synaptogenesis|IMP|GO:0007416|Proteome|11002423//biological process|neuromus
								CG1600	1.42	0.92	0.52	0.45	-1.6	-1.38	-1.58	-0.31	-2.88	0.55	1.21	-0.77	CG1600	CG1600	CG1600	||CG1600||	35687	2R	43D2-43D3	molecular function||IEA|GO:0004024|Proteome|11002423//molecular function|zinc ion binding|IEA|GO:0008270|Proteome|11002423//
								CG18285	1.43	0.62	0.48	0.44	-1.31	-1.45	-1.38	-0.16	-2.62	0.45	0.89	-0.75	CG18285	igloo	igl	||invertebrate GAP-43-like||CG18285||igl||	36681	2R	51E3-51E5	molecular function|calmodulin binding|TAS|GO:0005516|Proteome|11002423//
								CG30069	1.56	0.46	0.17	0.46	-0.92	-1.04	-1.33	-0.47	-2.3	0.85	0.87	-0.61	CG30069	CG30069	CG30069	||CG30069||CG8381||CG13017||	36573	NA	50E2-50E3	biological process|regulation of cell cycle|IEA|GO:0000074|Proteome|11002423//biological process|cell cycle|IMP|GO:0007049|Proteome|11002423//biological process|metabolism|IEA|GO:0008152|Proteome|11002423//biological process|cell proliferation|IEA|GO:0008
								CG3164	1.51	0.41	-0.06	0.29	-1.08	-1.44	-1.23	-0.27	-2.14	0.73	0.87	-0.74	CG3164	CG3164	CG3164	||CG3164||CK02656||BEST:CK02656||	33171	2L	21B1	molecular function|nucleotide binding|IEA|GO:0000166|Proteome|11002423//molecular function|ATP binding|IEA|GO:0005524|Proteome|11002423//biological process|lipid metabolism|IEA|GO:0006629|Proteome|11002423//biological process|lipid transport|IEA|GO:000686
								CG3767	0.95	0.11	-0.12	0.08	-0.54	-0.91	-1.48	-0.02	-2.2	0.23	1.06	-0.59	CG3767	Juvenile hormone-inducible protein 26	JhI-26	||JhI-26||CG3767||	36819	2R	53A4-53A5	biological process|biological_process unknown|ND|GO:0000004|Proteome|11002423//molecular function|molecular_function unknown|ND|GO:0005554|Proteome|11002423//cellular component|cellular_component unknown|ND|GO:0008372|Proteome|11002423//
								CG8317	0.5	0.13	0.19	0.12	-0.89	-0.85	-1.26	-0.08	-2.23	0.35	1.25	-0.45	CG8317	CG8317	CG8317	NA	36853	2R	53C9	NA
								CG15105	0.79	0.35	0.16	0.23	-1.1	-1.55	-1.52	-0.29	-2.93	0.88	1.24	-0.23	CG15105	CG15105	CG15105	||CG15105||	37190	2R	56A2-56A3	cellular component|ubiquitin ligase complex|IEA|GO:0000151|Proteome|11002423//molecular function|ubiquitin-protein ligase activity|IDA|GO:0004842|Proteome|11002423//biological process|nucleobase, nucleoside, nucleotide and nucleic acid metabolism|IEA|GO:0
								CG5001	1.14	0.2	0.25	0.16	-1.03	-1.05	-1.37	-0.36	-2.51	0.61	1.22	-0.2	CG5001	CG5001	CG5001	||CG5001||	33308	2L	21F2	biological process|protein folding|IEA|GO:0006457|Proteome|11002423//biological process|protein folding|IEA|GO:0006457|Proteome|11002423//biological process|response to stress|NAS|GO:0006950|Proteome|11002423//biological process|defense response|IEA|GO:00
								CG4998	0.4	0.42	-0.09	0.45	-0.98	-1.13	-1.61	-0.18	-2.97	0.36	0.94	-0.97	CG4998	CG4998	CG4998	||CG4998||SPH66||	39808	3L	720	molecular function|serine-type endopeptidase activity|ISS|GO:0004252|Proteome|11002423//molecular function|chymotrypsin activity|NAS|GO:0004263|Proteome|11002423//molecular function|trypsin activity|IEA|GO:0004295|Proteome|11002423//biological process|pro
								CG10650	0.7	0.14	-0.1	0.05	-0.73	-1.06	-1.17	-0.09	-2.12	0.75	1.03	-0.71	CG10650	CG10650	CG10650	||BEST:GH09876||CG10650||	35162	2L	37B8	biological process|metabolism|IEA|GO:0008152|Proteome|11002423//molecular function|oxidoreductase activity|IEA|GO:0016491|Proteome|11002423//
								CG31692	0.69	0.4	-0.08	0.38	-0.75	-1.05	-1.39	-0.24	-2.51	0.62	1.09	-0.59	CG31692	fructose-1	fbp	||fbp||FbPase||CG10611||CG31692||	35265	2L	38A2-38A3	biological process|carbohydrate metabolism|IEA|GO:0005975|Proteome|11002423//biological process|carbohydrate metabolism|IEA|GO:0005975|Proteome|11002423//molecular function|fructose-bisphosphatase activity|NAS|GO:0042132|Proteome|11002423//molecular funct
								CG5431	0.95	0.44	0.41	0.68	-0.73	-1.59	-1.46	0.04	-3.39	1.08	0.69	-1.44	CG5431	CG5431	CG5431	||CG5431||	37743	2R	59F6	molecular function|tyrosine-ester sulfotransferase activity|ISS|GO:0017067|Proteome|11002423//
								CG5390	0.69	0.42	0.75	0.34	-0.55	-1.01	-1.29	0.05	-2.51	1.38	1.14	-0.77	CG5390	CG5390	CG5390	||SPH35||CG5390||c-SPH35||gh06341||BEST:GH06341||	34383	2L	31D1	molecular function|serine-type endopeptidase activity|ISS|GO:0004252|Proteome|11002423//molecular function|chymotrypsin activity|NAS|GO:0004263|Proteome|11002423//molecular function|trypsin activity|IEA|GO:0004295|Proteome|11002423//biological process|pro
								CG2374	0.42	0.18	0.19	0.18	-0.73	-1.32	-1.33	-0.23	-2.47	0.96	0.97	-1.02	CG2374	late bloomer	lbm	||tetraspanin 42E||latebloomer||Late Bloomer||CG2374||lbl||Lbm||lbm||Dm.Tsp42Em||	35623	2R	420000000	cellular component|extracellular|ISS|GO:0005576|Proteome|11002423//molecular function|receptor signaling protein activity|IEA|GO:0005057|Proteome|11002423//biological process|ectoderm development|IEA|GO:0007398|Proteome|11002423//biological process|neurog
								CG30172	0.42	0.38	0.33	0.28	-0.85	-1.15	-1.14	-0.18	-2.27	1.09	1.07	-1.02	CG30172	CG30172	CG30172	NA	246496	2R	60B5	NA
								CG6409	1.55	0.83	0.57	0.58	-0.67	-1.76	-1.36	-0.06	-2.91	1.47	1.29	-0.47	CG6409	CG6409	CG6409	||CG6409||	39220	3L	67F1	cellular component|endoplasmic reticulum|TAS|GO:0005783|Proteome|11002423//biological process|GPI anchor biosynthesis|NAS|GO:0006506|Proteome|11002423//
								CG7702	1.04	0.34	0.38	0.05	-0.46	-0.82	-0.74	-0.05	-1.55	0.97	0.8	-0.5	CG7702	CG7702	CG7702	NA	42242	NA	91B8-91C1	NA
								CG9629	1.65	0.99	1.04	0.33	-0.77	-1.26	-1.08	-0.01	-2.79	1.17	1.37	-0.77	CG9629	CG9629	CG9629	||CG9629||	40097	3L	76A3	biological process|metabolism|IEA|GO:0008152|Proteome|11002423//molecular function|aldehyde dehydrogenase (NAD) activity|ISS|GO:0004029|Proteome|11002423//
								CG1648	1.59	0.09	-0.08	0.5	-1.28	-2.34	-1.38	-0.3	-3.29	1.31	1.11	-1.09	CG1648	CG1648	CG1648	NA	36009	2R	46B4	NA
								CG7658	1.24	0.18	0.21	0.63	-1.28	-2.56	-1.38	-0.13	-3.11	1.79	1.08	-0.9	CG7658	CG7658	CG7658	||BcDNA:RE32113||CG7658||anon-EST:ParkEST167||	40355	3L	78C6	molecular function|structural constituent of larval cuticle (sensu Insecta)|NAS|GO:0008010|Proteome|11002423//
								CG15117	1.04	0.34	0.48	0.08	-0.62	-1.46	-1.06	-0.44	-2.48	1.16	0.38	-0.93	CG15117	CG15117	CG15117	||CG15117||	37197	2R	56B5	biological process|carbohydrate metabolism|IEA|GO:0005975|Proteome|11002423//biological process|carbohydrate metabolism|IEA|GO:0005975|Proteome|11002423//biological process|proteolysis and peptidolysis|NAS|GO:0006508|Proteome|11002423//molecular function|
								CG13315	1.29	0.67	0.52	0.59	-1.14	-1.69	-1.74	-0.29	-3.28	1.47	1.09	-1.23	CG13315	CG13315	CG13315	NA	50300	3L	66F5	NA
								CG3814	1.42	0.39	0.59	0.87	-1.21	-1.58	-1.35	-0.22	-3.09	1.01	0.85	-0.97	CG3814	CG3814	CG3814	||CG3814||CK02213||BEST:CK02213||	36418	2R	49D6	molecular function|N-methyl-D-aspartate selective glutamate receptor activity|ISS|GO:0004972|Proteome|11002423//cellular component|N-methyl-D-aspartate selective glutamate receptor complex|ISS|GO:0017146|Proteome|11002423//
								CG1106	1.5	0.87	0.22	0.5	-0.73	-1.3	-1.24	-0.32	-2.93	0.69	0.88	-0.56	CG1106	Gelsolin	Gel	||gel||Gel||Drosophila Gelsolin||CG1106||gelsolin||DGS||	46008	3R	82A1	cellular component|extracellular|ISS|GO:0005576|Proteome|11002423//cellular component|cytosol|NAS|GO:0005829|Proteome|11002423//cellular component|actin filament|NAS|GO:0005884|Proteome|11002423//molecular function|structural constituent of cytoskeleton|I
								CG31997	0.97	0.92	0.23	0.32	-1.1	-1.49	-1.15	-0.34	-3.06	0.79	0.96	-1.18	CG31997	CG31997	CG31997	||BEST:GH25016||CG31997||BcDNA:RE42475||	319064	4	102B1	biological process|biological_process unknown|ND|GO:0000004|Proteome|11002423//molecular function|molecular_function unknown|ND|GO:0005554|Proteome|11002423//cellular component|cellular_component unknown|ND|GO:0008372|Proteome|11002423//
								CG8776	1.54	1.12	0.61	0.5	-0.94	-1.77	-1.26	-0.05	-3.53	0.89	0.99	-1.14	CG8776	CG8776	CG8776	||CG13147||CG8776||	36395	NA	49B11-49C1	biological process|electron transport|IEA|GO:0006118|Proteome|11002423//biological process|electron transport|IEA|GO:0006118|Proteome|11002423//cellular component|integral to membrane|NAS|GO:0016021|Proteome|11002423//molecular function|carbon-monoxide ox
								CG7646	0.83	0.14	0.2	0.28	-0.42	-1.07	-1.07	0.03	-1.89	0.96	0.89	-0.64	CG7646	CG7646	CG7646	||CG7646||anon-EST:Posey160||BcDNA:RH69723||	40187	NA	76D8	molecular function|calmodulin binding|TAS|GO:0005516|Proteome|11002423//biological process|calcium-mediated signaling|TAS|GO:0019722|Proteome|11002423//molecular function|calcium ion binding|IEA|GO:0005509|Proteome|11002423//
								CG13124	1.1	-0.13	0.04	0.13	-0.76	-1.08	-0.9	-0.29	-2.43	0.89	0.94	-0.54	CG13124	CG13124	CG13124	NA	34310	NA	30E1-30E3	NA
								CG7820	1.14	0.58	0.12	0.25	-0.8	-1.58	-1.4	-0.24	-2.77	1.6	1.04	-0.7	CG7820	Carbonic anhydrase 1	CAH1	||CG7820||CAH||CAH1||BG:DS00941.1||	34786	NA	34D4	biological process|one-carbon compound metabolism|NAS|GO:0006730|Proteome|11002423//molecular function|zinc ion binding|IEA|GO:0008270|Proteome|11002423//molecular function|carbonate dehydratase activity|ISS|GO:0004089|Proteome|11002423//molecular functio
								CG2930	0.9	0	0.16	0.13	-0.47	-1.34	-0.72	-0.24	-2.49	1.52	0.96	-0.72	CG2930	CG2930	CG2930	||CG2930||CG32787||CG32780||BcDNA:GH06717||	31341	X	3F4	biological process|transport|IEA|GO:0006810|Proteome|11002423//biological process||IEA|GO:0006857|Proteome|11002423//cellular component|membrane|IEA|GO:0016020|Proteome|11002423//molecular function|proton-dependent oligopeptide transporter activity|NAS|GO
								CG6953	1.34	-0.03	0.64	0.27	-0.76	-1.57	-1.05	-0.28	-2.78	1.64	1.1	-0.71	CG6953	fat-spondin	fat-spondin	||CT21501||CG6953||fat-spondin||	36919	2R	53F3-53F4	molecular function|serine-type endopeptidase inhibitor activity|IEA|GO:0004867|Proteome|11002423//molecular function|structural molecule activity|ISS|GO:0005198|Proteome|11002423//biological process|cytoskeleton organization and biogenesis|IEA|GO:0007010|
								CG31098	1.26	0.32	0.27	0.05	-0.91	-1.13	-0.77	-0.19	-2.45	0.98	0.88	-0.63	CG31098	CG31098	CG31098	NA	43057	3R	96C9-96D1	NA
								CG12403	1.1	0.37	0.36	0.04	-1.05	-1.31	-0.92	-0.34	-2.38	0.6	0.88	-0.78	CG12403	Vha68-1	Vha68-1	||V-ATPase||vha68-1||Vha68-1||vha67-2||CG12403||Vha68||Vha||	45668	2L	34A4	molecular function|ATP binding|IEA|GO:0005524|Proteome|11002423//biological process||IEA|GO:0006754|Proteome|11002423//biological process||IEA|GO:0015986|Proteome|11002423//cellular component||IEA|GO:0016469|Proteome|11002423//molecular function||IEA|GO:0
								CG6579	1.58	0.49	0.5	0.06	-1	-1.95	-1.44	-0.44	-3.54	1.17	1.03	-0.91	CG6579	CG6579	CG6579	NA	34647	2L	33D2	NA
								CG8083	0.85	0.08	0.31	0.04	-0.98	-1.41	-0.95	-0.17	-2.61	1.05	1.07	-0.61	CG8083	CG8083	CG8083	||CK00459||BEST:CK00459||CG8083||	35914	2R	45A1	molecular function|transporter activity|IEA|GO:0005215|Proteome|11002423//biological process|cation transport|IEA|GO:0006812|Proteome|11002423//cellular component|membrane|IEA|GO:0016020|Proteome|11002423//molecular function|sodium symporter activity|ISS|
								CG32571	0.98	0.37	0.22	0.08	-0.64	-1.46	-1.19	0.09	-2.91	1.47	0.99	-0.95	CG32571	CG32571	CG32571	||CG32571||	318094	X	15A3	biological process|biological_process unknown|ND|GO:0000004|Proteome|11002423//molecular function|molecular_function unknown|ND|GO:0005554|Proteome|11002423//cellular component|cellular_component unknown|ND|GO:0008372|Proteome|11002423//
								CG10913	0.8	0.28	0.29	0.16	-0.57	-1.15	-0.77	-0.07	-2.79	0.88	1	-0.62	CG10913	Serine protease inhibitor 6	Spn6	||CG10913||sp6||sp-6||Spn6||serpin 6||	49803	2R	55B7	biological process|proteolysis and peptidolysis|NAS|GO:0006508|Proteome|11002423//molecular function|serine-type endopeptidase inhibitor activity|IEA|GO:0004867|Proteome|11002423//molecular function|serine-type endopeptidase inhibitor activity|IEA|GO:0004
								CG14568	1.44	0.4	0.39	0.43	-0.66	-1.98	-1.12	-0.21	-3.54	1.5	0.99	-0.83	CG14568	CG14568	CG14568	NA	40418	3L	7800000	NA
								CG8511	1.05	0.21	0.5	0.34	-0.79	-1.58	-1.16	-0.37	-3.36	1.47	1.09	-0.88	CG8511	CG8511	CG8511	||CG8511||	36353	2R	49A3	molecular function|structural constituent of cuticle (sensu Insecta)|ISS|GO:0005214|Proteome|11002423//
								CG12703	0.62	0.32	-0.01	0.01	-1.03	-0.58	-0.17	-0.05	-0.85	0.58	0.86	-0.24	CG12703	CG12703	CG12703	||i17||CG12703||	32992	X	18F1	molecular function|nucleotide binding|IEA|GO:0000166|Proteome|11002423//molecular function|ATP binding|IEA|GO:0005524|Proteome|11002423//biological process|lipid metabolism|IEA|GO:0006629|Proteome|11002423//biological process|lipid transport|IEA|GO:000686
								CG13042	2.08	1.8	0.34	-0.01	-2.28	-1.92	-0.75	-0.24	-1.6	1.57	0.5	-0.51	CG13042	CG13042	CG13042	NA	39798	NA	720	NA
								CG13504	0.89	1.14	-0.42	0.09	-1.43	-1.56	-0.65	-0.33	-1.07	1	0.86	-0.73	CG13504	CG13504	CG13504	NA	37526	NA	58C1	NA
								CG32550	1.09	0.97	0.02	0.18	-1.56	-1.63	-0.69	-0.33	-1.01	0.93	1.25	-0.21	CG32550	CG32550	CG32550	||CG32550||	318084	NA	17B1	biological process|biological_process unknown|ND|GO:0000004|Proteome|11002423//molecular function|molecular_function unknown|ND|GO:0005554|Proteome|11002423//cellular component|cellular_component unknown|ND|GO:0008372|Proteome|11002423//
								CG4145	2.9	0.85	0.08	1.43	-2.22	-1.79	-1.32	-0.58	-1.79	1.85	0.69	-0.22	CG4145	Collagen type IV	Cg25C	||collagen IV||Collagen IV||collagen||type IV collagen||Type IV collagen||collagen type IV||&agr;1||Dcg||gp125||CG25C||Cg25C||Cgc25||CT12803||collagenIV a1||Cgc25C||Laminin &agr;3,5||CG4145||preprocollagen &agr;||type IV collagen, &agr;-chain||&agr;(IV)1/	33727	2L	25C1	molecular function|structural molecule activity|ISS|GO:0005198|Proteome|11002423//molecular function|extracellular matrix structural constituent|IEA|GO:0005201|Proteome|11002423//molecular function|extracellular matrix structural constituent|IEA|GO:000520
								CG2229	3.62	2.54	1.9	0.4	-3.04	-3.27	-1.9	0.07	-2.11	0.85	0.21	0.26	CG2229	Jonah 99Fii	Jon99Fii	||Jonah 99F||Jon99Fii||CG2229||SP135||Jon99F||	43621	3R	99F6	molecular function|chymotrypsin activity|NAS|GO:0004263|Proteome|11002423//molecular function|trypsin activity|IEA|GO:0004295|Proteome|11002423//molecular function|serine-type endopeptidase activity|ISS|GO:0004252|Proteome|11002423//biological process|pro
								CG6829	0.89	0.39	0.86	0.17	-0.34	-0.62	-0.41	-0.31	-0.93	0.82	0.98	-0.09	CG6829	Apaf-1-related-killer	Ark	||Transcription unit 1||dark||dArk||Dark||DARK||CG6829||dark/hac-1/dapaf-1||Dark/Hac-1/dApaf-1||dark/dapaf-1/hac-1||dApaf-1/DARK/HAC-1||T1||dapaf-1L||D-Apaf-1||anon-53Fa||hac-1||Hac-1||dapaf-1S||arc||Dark/Dapaf-1/HAC1||Apaf-1 related killer||Dapaf-1||dApa	36914	2R	53E7-53E10	biological process|sperm individualization|IMP|GO:0007291|Proteome|11002423//biological process|caspase activation via cytochrome c|TAS|GO:0008635|Proteome|11002423//biological process|caspase activation|IMP|GO:0006919|Proteome|11002423//biological proces
								CG3683	0.59	0.09	0.32	-0.1	-0.59	-0.98	-0.35	-0.05	-0.96	0.81	0.52	0.01	CG3683	CG3683	CG3683	||CG3683||	37946	2R	60D13	molecular function|NADH dehydrogenase activity|ISS|GO:0003954|Proteome|11002423//cellular component|respiratory chain complex I (sensu Eukarya)|ISS|GO:0005747|Proteome|11002423//cellular component|respiratory chain complex I (sensu Eukarya)|ISS|GO:0005747
								CG6666	0.94	0.55	0.75	0.2	-0.85	-1.23	-0.25	-0.26	-0.97	1.18	0.98	0.1	CG6666	CG6666	CG6666	||CG6666||BcDNA:RH04289||	41340	3R	86D7-86D8	molecular function|succinate dehydrogenase activity|TAS|GO:0000104|Proteome|11002423//cellular component|respiratory chain complex II (sensu Eukarya)|NAS|GO:0005749|Proteome|11002423//cellular component|respiratory chain complex II (sensu Eukarya)|NAS|GO:
								CG9734	1.36	0.86	0.44	0.28	-1.42	-0.69	-0.84	-0.13	-0.96	0.57	0.57	-0.6	CG9734	globin 1	glob1	||CG9734||Hb||dmeglob1||DmeGlob1||Hemoglobin||glob1||Glob1||	41930	3R	89A8	molecular function|carrier activity|IEA|GO:0005386|Proteome|11002423//biological process||IEA|GO:0015671|Proteome|11002423//molecular function|oxygen transporter activity|IEA|GO:0005344|Proteome|11002423//
								CG9035	1.04	1.02	1.26	0.97	-1.11	-1.88	-0.64	-0.05	-1.1	0.81	0.63	-0.68	CG9035	NA	NA	NA	192347	NA	NA	NA
								CG13068	1.05	0.66	0.77	1.44	-1.37	-1.93	-1.34	-0.05	-1.94	0.39	0.81	-0.69	CG13068	CG13068	CG13068	NA	39784	3L	72D10	NA
								CG14640	1.14	0.44	0.73	0.62	-1.39	-0.98	-1.29	-0.39	-1.58	0.61	0.65	-0.51	CG14640	CG14640	CG14640	NA	40537	NA	82A1	NA
								CG13463	1.53	2.54	1.29	1.32	-0.99	-2.68	-1.7	-0.32	-3.12	0.85	0.27	-1	CG13463	CG13463	CG13463	NA	39637	3L	71B2	NA
								CG10582	0.74	0.63	0.32	0.42	-0.45	-1.14	-0.23	-0.16	-0.82	0.23	0.4	-0.06	CG10582	Sex-lethal interactor	Sin	||sin||Sin||CG10582||	40325	3L	78A5	biological process|nuclear mRNA splicing, via spliceosome|NAS|GO:0000398|Proteome|11002423//molecular function|protein binding|IEA|GO:0005515|Proteome|11002423//cellular component|snRNP U1|ISS|GO:0005685|Proteome|11002423//
								CG15361	1.32	1.46	0.01	0.22	-2.73	-2.84	-0.97	-0.43	-2.24	0.53	0.67	-0.94	CG15361	Neuropeptide-like precursor 4	Nplp4	||YSY peptide||CG15361||Nplp4||NPLP4||neuropeptide-like precursor 4||	50190	NA	22B8	molecular function|neuropeptide hormone activity|ISS|GO:0005184|Proteome|11002423//cellular component|extracellular|ISS|GO:0005576|Proteome|11002423//biological process|neuropeptide signaling pathway|ISS|GO:0007218|Proteome|11002423//
								CG5476	1.17	1.22	0.46	0.43	-1.99	-2.32	-0.82	0.02	-1.5	0.73	0.63	-0.57	CG5476	CG5476	CG5476	NA	43207	3R	97C2	NA
								CG14493	1.58	1.66	-0.19	0.57	-1.61	-2.75	-1.23	-0.43	-2.47	0.75	0.4	-1.41	CG14493	NA	NA	NA	192347	NA	NA	NA
								CG13059	1.48	1.97	-0.55	0.92	-1.94	-2.5	-1.11	-0.32	-2.24	1.17	0.35	-0.96	CG13059	CG13059	CG13059	NA	39803	3L	720	NA
								CG13731	2.21	1.9	-0.58	0.54	-2.67	-2.82	-1.06	-0.54	-2.54	1.3	0.69	-0.68	CG13731	CG13731	CG13731	NA	39938	3L	74A6-74B1	NA
								CG5885	0.6	0.57	0.34	0.16	-0.36	-1	-0.33	-0.1	-0.7	0.55	0.33	-0.45	CG5885	CG5885	CG5885	||CK01296||BEST:CK01296||CG5885||AI945207||	34314	2L	300000	biological process||IEA|GO:0006613|Proteome|11002423//biological process|intracellular protein transport|IEA|GO:0006886|Proteome|11002423//cellular component|integral to endoplasmic reticulum membrane|NAS|GO:0030176|Proteome|11002423//cellular component|t
								CG4170	1.64	1.56	0.32	0.35	-0.61	-1.69	-0.67	-0.33	-1.75	0.94	0.55	-0.87	CG4170	vasa intronic gene	vig	||BG:DS00929.13||EP(2)0812||vig||VIG||CG4170||	34885	2L	35B10-35C1	biological process|RNA interference|IPI|GO:0016246|Proteome|11002423//cellular component|RNA-induced silencing complex|TAS|GO:0016442|Proteome|11002423//molecular function|mRNA binding|ISS|GO:0003729|Proteome|11002423//cellular component|RNA-induced silen
								CG5670	1.8	1.26	0.58	0.64	-0.47	-1.85	-1.28	-0.12	-1.81	0.81	0.36	-1.14	CG5670	NA	NA	NA	192347	NA	NA	NA
								CG9073	1.93	1.65	2.11	1.32	-1.57	-2.49	-1.57	-0.46	-2.98	1.6	1.2	-0.3	CG9073	Troponin C at 47D	TpnC47D	||TpnC Ib||DmTpnCIb||TpnC47D||TnC47D||TnC||TNC||DmTpnC47D||BcDNA:RE34610||DmTnC2||troponin C||CG9073||	36195	2R	47000	biological process||IEA|GO:0001539|Proteome|11002423//molecular function|calmodulin binding|TAS|GO:0005516|Proteome|11002423//biological process|muscle contraction|IEA|GO:0006936|Proteome|11002423//cellular component||IEA|GO:0009288|Proteome|11002423//bio
								CG13069	0.93	1.78	0.96	0.46	-1.65	-2.26	-0.81	-0.01	-1.94	0.87	0.51	-1.15	CG13069	CG13069	CG13069	NA	50271	3L	72D10	NA
								CG14096	1.54	2.57	1.5	1.5	-2.1	-2.52	-0.94	0.2	-1.82	0.84	0.47	-1.19	CG14096	CG14096	CG14096	NA	40113	3L	76B3	NA
								CG5468	0.86	1.7	1.17	1.1	-2.15	-2.49	-1.11	0	-1.74	0.57	0.04	-1.14	CG5468	CG5468	CG5468	NA	43200	3R	97C2	NA
								CG1019	1.99	1.61	0.92	0.55	-1.52	-2.67	-1.41	-0.45	-2.14	0.49	0.98	-0.9	CG1019	Muscle LIM protein at 84B	Mlp84B	||Muscle-specific LIM protein at 84B||DmLIM-3||CG1019||DLim-3||mlp84B||Mlp84B||dMlp84B||Ml&mgr;84B||	40849	NA	84C1	biological process|mesoderm development|NAS|GO:0007498|Proteome|11002423//molecular function|zinc ion binding|IEA|GO:0008270|Proteome|11002423//biological process|cell proliferation|IEA|GO:0008283|Proteome|11002423//molecular function|protein binding|IEA|
								CG30338	1	0.75	0.4	0.15	-1.01	-1.59	-0.78	0.08	-0.81	0.43	0.65	-0.4	CG30338	CG30338	CG30338	||CG30338||	246548	NA	45F6	biological process|biological_process unknown|ND|GO:0000004|Proteome|11002423//molecular function|molecular_function unknown|ND|GO:0005554|Proteome|11002423//cellular component|cellular_component unknown|ND|GO:0008372|Proteome|11002423//
								CG5596	1.81	2.1	1.36	0.36	-1.9	-3.29	-1.63	-0.1	-1.6	0.78	0.2	-1.15	CG5596	Myosin alkali light chain 1	Mlc1	||LC1||mlc-alk||MLC-ALK||CG5596||ELC||Mlci||MlcI||Myosin Light Chain-1||mlcl||myosin light chain||Mlc-1||mlc||mlc1||Mlc1||MLC1||DmMLC1||FBgn0002772||	43323	3R	98A14-98A15	molecular function|calcium ion binding|IEA|GO:0005509|Proteome|11002423//cellular component|muscle myosin|NAS|GO:0005859|Proteome|11002423//molecular function|cysteine-type endopeptidase activity|IEA|GO:0004197|Proteome|11002423//biological process|proteo
								CG7178	2.1	1.91	1.02	0.49	-2.14	-3.62	-1.85	-0.41	-1.99	1.16	0.65	-1.29	CG7178	wings up A	wupA	||DROTROPONI||CG7178||troponin I||Troponin I||HL08042||heldup||haplo-lethal region I||troponin||wup-A||HL-I||wings-up A||TpnI||TnI||HDP||hdp||wupA||HLI||troponin-I||held-up||	32794	X	16F7	molecular function|structural constituent of cytoskeleton|IEA|GO:0005200|Proteome|11002423//biological process|muscle contraction|IEA|GO:0006936|Proteome|11002423//biological process|myofibril assembly|IMP|GO:0030239|Proteome|11002423//biological process|
								CG10530	2.07	2.47	1.53	0.64	-2.15	-2.89	-1.03	-0.2	-2.38	0.66	0.54	-1.1	CG10530	Lcp65Ag1	Lcp65Ag1	||DCP8-alpha||Lcp65Ag1||CG10530||Lcp-g1||L<down>3</down>CP8||Lcp8||LCP8||	38703	3L	65A6	molecular function|structural constituent of larval cuticle (sensu Insecta)|NAS|GO:0008010|Proteome|11002423//molecular function|structural constituent of larval cuticle (sensu Insecta)|NAS|GO:0008010|Proteome|11002423//cellular component|extracellular|IS
								CG30457	1.98	2.23	0.75	0.72	-2.35	-3.01	-1.23	-0.24	-2.17	0.8	0.52	-0.8	CG30457	CG30457	CG30457	NA	36940	2R	54A2	NA
								CG10534	1.57	2.22	1.4	0.87	-1.92	-2.7	-1	-0.65	-1.76	0.67	0.35	-0.5	CG10534	Lcp65Ag2	Lcp65Ag2	||DCP8-beta||BcDNA:RE01644||Lcp65Ag2||Lcp-g2||L<down>3</down>CP8||Lcp8||LCP8||CG10534||	38702	3L	65A6	molecular function|structural constituent of larval cuticle (sensu Insecta)|NAS|GO:0008010|Proteome|11002423//molecular function|structural constituent of larval cuticle (sensu Insecta)|NAS|GO:0008010|Proteome|11002423//
								CG10529	2.11	2.05	1.37	0.89	-2.33	-3.03	-1.43	-0.54	-1.54	-0.25	0.04	-1.05	CG10529	Lcp65Ae	Lcp65Ae	||Lcp65Ae||DMLCP65e||Lcp-e||CG10529||DCP6||	45018	NA	65A6	molecular function|structural constituent of larval cuticle (sensu Insecta)|NAS|GO:0008010|Proteome|11002423//molecular function|structural constituent of larval cuticle (sensu Insecta)|NAS|GO:0008010|Proteome|11002423//
								CG14752	2.18	2.23	1.21	1.04	-2.25	-2.82	-1.3	-0.37	-1.74	0.38	0.29	-0.78	CG14752	CG14752	CG14752	NA	35840	2R	44D4	NA
								CG13044	1.88	1.77	0.34	1.01	-1.63	-2.11	-0.95	-0.31	-2.58	1.65	1.25	-0.3	CG13044	CG13044	CG13044	NA	39795	3L	720	NA
								CG13043	1.19	1.25	0.26	0.37	-1.6	-1.49	-0.57	-0.09	-1.66	0.91	1.01	-0.42	CG13043	CG13043	CG13043	NA	39796	3L	720	NA
								CG15023	1.36	1.27	0.12	0.49	-1.77	-1.82	-0.97	-0.13	-2.02	1.24	1.26	-0.62	CG15023	CG15023	CG15023	NA	38550	3L	64B6	NA
								CG15509	2.29	1.54	0.72	1.22	-0.98	-1.98	-0.93	-0.34	-2.61	0.92	0.65	0.09	CG15509	NA	NA	NA	192347	NA	NA	NA
								CG5939	2.2	1.21	0.38	0.93	-0.98	-1.91	-1.54	-0.4	-2.39	1.13	0.81	-0.25	CG5939	Paramyosin	Prm	||miniparamyosin||paramyosin/miniparamyosin||Paramyosin/Miniparamyosin||paramyosin||Para||CG5939||PM/mPM||mPM||0106/05||l(3)10631||PM||lethal (3) S010605||FBgn0003149||prm||Prm||l(3)S010605||	39002	3L	66D12-66D14	molecular function|structural constituent of cytoskeleton|IEA|GO:0005200|Proteome|11002423//molecular function|cytoskeletal protein binding|IEA|GO:0008092|Proteome|11002423//cellular component|myosin|ISS|GO:0016459|Proteome|11002423//biological process|me
								CG31332	1.62	1.26	0.68	0.57	-1	-1.3	-1.23	-0.23	-2.74	0.7	0.91	-0.46	CG31332	unc-115	unc-115	||CG9489||unc-115||anon-WO0140519.9||dunc-115||CG31332||	41178	NA	850000	molecular function|structural constituent of cytoskeleton|IEA|GO:0005200|Proteome|11002423//biological process|cell motility|IEA|GO:0006928|Proteome|11002423//biological process|cytoskeleton organization and biogenesis|IEA|GO:0007010|Proteome|11002423//bi
								CG11482	1.81	1.08	0.5	0.21	-0.79	-1.37	-0.82	-0.57	-2.23	0.91	0.94	-0.4	CG11482	Mlh1	Mlh1	||Mlh1||CG11482||dmlh-1||dmlh1||	35796	NA	44B9	molecular function|nucleic acid binding|IEA|GO:0003676|Proteome|11002423//molecular function|ATP binding|IEA|GO:0005524|Proteome|11002423//cellular component|nucleus|IEA|GO:0005634|Proteome|11002423//biological process|mismatch repair|IDA|GO:0006298|Prote
								CG31352	1.89	1.31	0.69	0.65	-1.48	-2.08	-0.84	-0.45	-2.94	0.89	1.18	-0.39	CG31352	CG31352	CG31352	||CG9489||CG31352||anon-WO0140519.21||	261629	NA	85E4-85E5	molecular function|actin binding|NAS|GO:0003779|Proteome|11002423//molecular function|actin binding|NAS|GO:0003779|Proteome|11002423//molecular function|structural constituent of cytoskeleton|IEA|GO:0005200|Proteome|11002423//biological process|cell motil
								CG13060	1.17	1.12	0.64	0.52	-1.57	-2.51	-1.53	-0.09	-2.13	1.44	0.48	-1.03	CG13060	CG13060	CG13060	NA	39802	3L	720	NA
								CG4676	1.48	1.49	0.48	1.27	-1.89	-2.3	-1.39	-0.58	-2.27	1.32	0.8	-1.37	CG4676	CG4676	CG4676	||CG4676||	36465	2R	49F11	molecular function|metal ion binding|NAS|GO:0046872|Proteome|11002423//
								CG11350	1.32	0.9	0.34	0.89	-1.83	-2.13	-1.07	0	-1.92	0.64	0.72	-0.93	CG11350	CG11350	CG11350	NA	38554	3L	64B8	NA
								CG18817	1.74	1.02	0.82	1.04	-2.31	-2.73	-1.83	-0.47	-2.16	1.1	0.83	-1.12	CG18817	Tetraspanin 42Ea	Tsp42Ea	||CG18742||Dm.Tsp42Ea||Tsp42Ea||CG18817||tetraspanin 42E||GH05668||BcDNA:GM15292||BcDNA:GH05668||CG3364||Q9U3V4||	59178	NA	420000	cellular component|integral to membrane|NAS|GO:0016021|Proteome|11002423//
								CG16885	1.56	1.42	0.73	0.16	-1.86	-2.24	-1.39	-0.54	-2.64	1.27	0.99	-1.05	CG16885	CG16885	CG16885	NA	34811	2L	340000	NA
								CG17870	1.23	0.76	0.04	0.25	-1.07	-1.59	-1.13	-0.39	-1.68	0.91	0.52	-0.76	CG17870	NA	NA	NA	192347	NA	NA	NA
								CG4843	1.34	0.84	0.69	0.33	-1.12	-2.32	-1.41	-0.44	-1.87	0.98	0.96	-0.64	CG4843	Tropomyosin 2	Tm2	||Troponin H||Tm||DROTROPI1||dro Tm||lethal(3)nc99Eb||TmI||Tropomyosin-2||Tm1||Ifm(3)3||Ifm-TmI||Tm2||Tropomyosin||tropomyosin||Ifm(3)5||mTmI||Tn-H||l(3)nc99Eb||tropomyosin I||Tropomyosin I||CG4843||	41853	3R	880000000000000	molecular function|structural constituent of cytoskeleton|IEA|GO:0005200|Proteome|11002423//biological process|muscle contraction|IEA|GO:0006936|Proteome|11002423//molecular function|actin binding|NAS|GO:0003779|Proteome|11002423//cellular component|muscl
								CG6981	2.08	0.88	0.45	0.7	-1.73	-2.81	-1.71	-0.16	-2.75	1.14	1.17	-0.78	CG6981	CG6981	CG6981	NA	40207	3L	77A1	NA
								CG31451	2.25	0.66	0.71	0.83	-1.21	-2.43	-1.68	-0.74	-3.1	1.14	1.2	-0.82	CG31451	CG31451	CG31451	||CG31451||BcDNA:GH16531||gh16531||anon-EST:Posey277||	318743	3R	95D4	biological process|biological_process unknown|ND|GO:0000004|Proteome|11002423//molecular function|molecular_function unknown|ND|GO:0005554|Proteome|11002423//cellular component|cellular_component unknown|ND|GO:0008372|Proteome|11002423//
								CG13033	1.8	0.83	0.57	0.25	-1.09	-1.9	-1.21	-0.31	-2.59	1.19	1.08	-0.91	CG13033	CG13033	CG13033	NA	39839	3L	73A5	NA
								CG8468	1.44	0.73	0.78	0.42	-1.22	-2.13	-1.32	-0.4	-3.08	1.02	1.2	-0.83	CG8468	CG8468	CG8468	||CG8468||	36577	2R	500000	biological process|cation transport|IEA|GO:0006812|Proteome|11002423//molecular function|monocarboxylate porter activity|NAS|GO:0015355|Proteome|11002423//
								CG8547	1.27	0.43	0.57	0.37	-1.13	-1.55	-0.98	-0.45	-1.99	0.78	1.05	-0.54	CG8547	NA	NA	NA	36586	2R	50E6-50E8	NA
								CG5177	1.78	0.92	1.12	0.38	-1.66	-2.39	-1.54	-0.34	-3	1.18	0.56	-1.25	CG5177	CG5177	CG5177	||CG5177||	34017	2L	27F5	biological process|disaccharide metabolism|IEA|GO:0005984|Proteome|11002423//biological process||IEA|GO:0005992|Proteome|11002423//molecular function|trehalose-phosphatase activity|IEA|GO:0004805|Proteome|11002423//
								CG9036	1.69	1.14	0.7	0.5	-1.79	-2.78	-1.29	-0.42	-3.95	1.5	0.71	-1.27	CG9036	NA	NA	||CG9036||	37299	2R	56F16	molecular function|structural constituent of larval cuticle (sensu Insecta)|NAS|GO:0008010|Proteome|11002423//
								CG32266	1.69	1.17	1.36	1.28	-1.91	-2.83	-1.37	-0.2	-3.66	1.45	1.05	-0.47	CG32266	CG32266	CG32266	||BcDNA:GM24338||CG32266||	317945	3L	63F1	biological process|biological_process unknown|ND|GO:0000004|Proteome|11002423//molecular function|molecular_function unknown|ND|GO:0005554|Proteome|11002423//cellular component|cellular_component unknown|ND|GO:0008372|Proteome|11002423//
								CG10533	1.16	0.95	0.85	0.94	-1.81	-2.62	-1.92	0.2	-3.28	1.47	0.85	-0.52	CG10533	Lcp65Af	Lcp65Af	||Lcp65Af||DMLCP65f||Lcp-f||DCP7||CG10533||	45017	3L	65A6	molecular function|structural constituent of larval cuticle (sensu Insecta)|NAS|GO:0008010|Proteome|11002423//molecular function|structural constituent of larval cuticle (sensu Insecta)|NAS|GO:0008010|Proteome|11002423//
								CG7532	1.35	1.08	1.04	0.99	-1.2	-2.53	-1.61	-0.09	-3.35	1.41	0.81	-1.03	CG7532	CG7532	CG7532	||DS01068.5||BcDNA:RE60882||CG7532||BG:DS01068.5||anon-EST:ParkEST060||	34838	2L	35A4	molecular function|serine-type endopeptidase activity|ISS|GO:0004252|Proteome|11002423//
								CG33269	1.65	2.81	1.4	0.63	-2.51	-2.86	-2.26	-0.45	-3.1	1.53	1.18	-0.31	CG33269	CG33269	CG33269	||CG6100||CG33269||CG32084||CG14139||	39296	NA	68C13	biological process|biological_process unknown|ND|GO:0000004|Proteome|11002423//molecular function|molecular_function unknown|ND|GO:0005554|Proteome|11002423//cellular component|cellular_component unknown|ND|GO:0008372|Proteome|11002423//
								CG13738	2.03	2.4	1.17	1.25	-1.95	-2.94	-1.39	-0.16	-3.34	1.06	0.48	-0.66	CG13738	CG13738	CG13738	NA	39541	3L	70C9	NA
								CG7930	1.74	2.11	1.62	1.8	-2.4	-2.47	-1.78	-0.44	-2.52	1.01	0.71	-1.04	CG7930	Troponin C at 73F	TpnC73F	||DmTpnCIa||TpnC73F||TnC73F||TnC||TNC||DmTpnC73F||DmTnC3||troponin C||CG7930||TpnC Ia||	39916	3L	7300000	biological process||IEA|GO:0001539|Proteome|11002423//molecular function|calmodulin binding|TAS|GO:0005516|Proteome|11002423//biological process|muscle contraction|IEA|GO:0006936|Proteome|11002423//cellular component||IEA|GO:0009288|Proteome|11002423//bio
								CG10119	1.88	1.65	1.22	0.79	-2.37	-1.87	-1.5	-0.45	-2.47	1.11	1	-0.64	CG10119	Lamin C	LamC	||G intermediate filament||pG-IF||G-IF||lamin C||LamC||LAMC||CG10119||	36615	2R	51B1	molecular function|structural constituent of cytoskeleton|IEA|GO:0005200|Proteome|11002423//biological process|cytoskeleton organization and biogenesis|IEA|GO:0007010|Proteome|11002423//cellular component|lamin filament|NAS|GO:0005638|Proteome|11002423//b
								CG13066	1.66	2.18	1.63	1.44	-1.87	-2.25	-1	-0.55	-2.51	1.21	0.87	-0.85	CG13066	CG13066	CG13066	NA	50270	NA	72D12	NA
								CG11949	1.68	1.54	0.78	0.86	-1.71	-1.68	-1.11	-0.32	-2.58	0.93	0.85	-0.81	CG11949	coracle	cora	||Coracle||CG11949||cor||Cor||COR||l(2)k08713||D4.1-Coracle||cora||D4.1||	37205	2R	56C4	cellular component|fusome|NAS|GO:0045169|Proteome|11002423//cellular component|spectrosome|TAS|GO:0045170|Proteome|11002423//cellular component|septate junction|ISS|GO:0005918|Proteome|11002423//molecular function|actin binding|NAS|GO:0003779|Proteome|110
								CG6460	1.4	1.75	1.06	0.89	-1.86	-1.82	-1.01	-0.37	-2.33	0.96	0.64	-0.88	CG6460	CG6460	CG6460	NA	43205	3R	97C2	NA
								CG18777	2.37	2	1.25	-0.04	-2.33	-2.49	-1.31	-0.56	-2.2	1.42	0.61	-0.4	CG18777	CG18777	CG18777	NA	59157	3L	65A6	NA
								CG33149	2.62	1.85	1.06	-0.08	-2.63	-2.94	-1.29	-0.36	-2.65	1.31	0.22	-0.82	CG33149	Muscle LIM protein at 60A	Mlp60A	||Mlp60A||CG3220||DmLIM-2||dMlp60A||DLim-2||BcDNA:RH74176||MLP||Mlp1||MLP1||Muscle-specific LIM protein at 60A||BcDNA:RE14544||CG33149||DMLP1||DMlp1||	37853	2R	60B8	biological process|mesoderm development|NAS|GO:0007498|Proteome|11002423//biological process|cell proliferation|IEA|GO:0008283|Proteome|11002423//cellular component|nucleus|IEA|GO:0005634|Proteome|11002423//cellular component|cytoplasm|IEA|GO:0005737|Prot
								CG6956	3.19	2.44	1.47	0.64	-1.73	-2.7	-1.44	-0.07	-3.24	1.71	1.03	-0.09	CG6956	Lcp65Ac	Lcp65Ac	||DCP2||CG6956||Lcp65Ac||DMLCP65c||Lcp-c||	38708	3L	65A6	molecular function|structural constituent of larval cuticle (sensu Insecta)|NAS|GO:0008010|Proteome|11002423//molecular function|structural constituent of larval cuticle (sensu Insecta)|NAS|GO:0008010|Proteome|11002423//
								CG10953	2.72	2.29	1.42	0.24	-1.68	-2.55	-1.24	-0.04	-2.69	1.31	0.57	-0.68	CG10953	CG10953	CG10953	NA	36941	2R	54A2	NA
								CG4696	2.83	2.46	1.61	0.43	-2.65	-2.75	-1.35	0.05	-3.26	1.65	0.66	-0.54	CG4696	Muscle protein 20	Mp20	||Dmmp20||DMMP20||myophilin||Tpn||CG4696||mp20||Mp20||	36468	2R	49F13	molecular function|structural constituent of cytoskeleton|IEA|GO:0005200|Proteome|11002423//biological process|muscle contraction|IEA|GO:0006936|Proteome|11002423//biological process|muscle development|NAS|GO:0007517|Proteome|11002423//biological process|
								CG32564	1.96	1.44	1.34	0.5	-2.03	-2.39	-1.19	-0.09	-2.34	1.04	0.92	-0.21	CG32564	CG32564	CG32564	NA	326222	X	15F3	NA
								CG5399	2.94	1.71	1.86	0.89	-2.29	-2.81	-1.97	-0.33	-3.11	1.82	0.83	-0.43	CG5399	CG5399	CG5399	NA	41900	3R	89A2	NA
								CG7465	1.65	1.11	1.53	0.57	-1.76	-2.19	-1.34	-0.31	-2.4	1.16	0.75	-0.37	CG7465	CG7465	CG7465	NA	38553	3L	64B8	NA
								CG6378	2.71	1.89	0.88	0.72	-2.18	-1.99	-1.5	-0.73	-3.1	1.36	1.05	-0.83	CG6378	BM-40-SPARC	BM-40-SPARC	||CG6378||BM40||CT19876||BM-40-SPARC||BM-40/SPARC||SPARC||anon-EST:Posey291||dSPARC||dsparc||	43230	3R	97D5	molecular function|structural molecule activity|ISS|GO:0005198|Proteome|11002423//molecular function|calcium ion binding|IEA|GO:0005509|Proteome|11002423//biological process|signal transduction|IEA|GO:0007165|Proteome|11002423//biological process|cell-cel
								CG31140	2.1	0.79	0.68	0.65	-1.65	-2.23	-1.31	-0.53	-2.08	0.96	0.82	-0.57	CG31140	CG31140	CG31140	||CG31452||DGKt||CG5875||CG31140||CG13600||	42836	3R	95D1-95D4	biological process|lipid metabolism|IEA|GO:0006629|Proteome|11002423//biological process|signal transduction|IEA|GO:0007165|Proteome|11002423//biological process||IEA|GO:0007205|Proteome|11002423//biological process|intracellular signaling cascade|IEA|GO:
								CG6803	2.42	1.49	0.98	0.67	-2.31	-2.64	-1.7	-0.36	-2.32	0.92	0.84	-0.46	CG6803	NA	NA	||Zeelin1||z1||CG6803||BcDNA:GH23305||	41824	3R	8800	biological process|muscle thick filament assembly|NAS|GO:0030241|Proteome|11002423//
								CG12517	2.15	1.66	0.82	0.46	-1.77	-2.58	-1.67	-0.46	-2.05	1.26	0.73	-0.95	CG12517	CG12517	CG12517	NA	34506	NA	32B3	NA
								CR31696	2.43	1.7	0.95	0.6	-1.74	-2.26	-1.53	-0.32	-2.24	1.26	0.85	-0.73	CR31696
								CG10348	2.03	1.02	1.8	0.64	-2.4	-0.82	-0.69	-0.33	-2.65	1.71	1	0.31	CG10348	CG10348	CG10348	||CG10348||	35132	NA	37A1	molecular function|nucleic acid binding|IEA|GO:0003676|Proteome|11002423//molecular function|structural constituent of ribosome|IEA|GO:0003735|Proteome|11002423//cellular component|intracellular|IEA|GO:0005622|Proteome|11002423//cellular component|nucleus
								CG4169	1.93	0.6	1	0.8	-1.07	-1.43	-0.42	-0.14	-1.27	0.25	0.77	0.06	CG4169	CG4169	CG4169	||anon-EST:Posey245||ubiquinol-cytochrome c reductase||CG4169||	39846	3L	73A10	cellular component|respiratory chain complex III (sensu Eukarya)|ISS|GO:0005750|Proteome|11002423//biological process|mitochondrial electron transport, ubiquinol to cytochrome c|ISS|GO:0006122|Proteome|11002423//molecular function|ubiquinol-cytochrome-c r
								CG10699	2.01	1.1	0.95	-0.04	-1.09	-0.8	-0.57	-0.46	-1.78	1.17	0.55	-0.24	CG10699	Lim3	Lim3	||CG10699||CG15174||lim3||Lim3||lethal(2)37Bd||l(2)Bd||l(2)37Bd||	35184	2L	37B13-37C1	biological process|regulation of transcription from Pol II promoter|IEA|GO:0006357|Proteome|11002423//biological process|ectoderm development|IEA|GO:0007398|Proteome|11002423//molecular function|zinc ion binding|IEA|GO:0008270|Proteome|11002423//biologica
								CG33267	2.86	1.06	0.93	0.79	-1.94	-0.68	-0.96	-0.58	-1.76	1.47	0.52	0.12	CG33267	NA	NA	NA	192347	NA	NA	NA
								CG11370	1.89	0.38	0.81	0.63	-2.54	-1.56	-1.03	0.14	-1.86	0.92	1.22	0.72	CG11370	CG11370	CG11370	NA	40486	3L	80A1	NA
								CG12874	1.42	0.97	-0.04	0.76	-1.62	-0.86	-0.28	-0.27	-1.19	0.91	0.83	0.08	CG12874	CG12874	CG12874	NA	43337	NA	98B3	NA
								CG9350	0.7	0.23	0.21	0.26	-0.91	-0.61	-0.16	-0.07	-0.73	0.7	0.53	0.03	CG9350	CG9350	CG9350	NA	37385	2R	57B12	NA
								CG5028	0.86	0.85	0.58	0.01	-1.13	-0.46	-0.63	-0.29	-0.46	0.53	0.41	-0.04	CG5028	CG5028	CG5028	||CG5028||	43102	3R	96000000000	biological process|amino acid biosynthesis|IEA|GO:0008652|Proteome|11002423//molecular function|isocitrate dehydrogenase (NAD+) activity|ISS|GO:0004449|Proteome|11002423//molecular function|isocitrate dehydrogenase (NAD+) activity|ISS|GO:0004449|Proteome|
								CG9042	1.03	0.47	0.6	0.07	-1.04	-0.54	-0.94	0.01	-0.34	0.5	0.65	0.19	CG9042	Glycerol 3 phosphate dehydrogenase	Gpdh	||gpdh||Gpdh||GPDH||&agr;-GPD||GAPDH||DROGPDHA||&agr;-GPDH-1||&agr;-GPDH||&agr;-Gpdh||sn-Gpdh||Gdh||&agr;Gpd||alpha-GPDH||alpha-Gpdh||CG9042||5' gene||GPD||Gpd||&agr;Gpdh-1||GPDA||&agr;Gpdh||&agr;GPDH||	33824	2L	26A3	biological process|carbohydrate metabolism|IEA|GO:0005975|Proteome|11002423//biological process|lipid metabolism|IEA|GO:0006629|Proteome|11002423//cellular component||IEA|GO:0009331|Proteome|11002423//molecular function|glycerol-3-phosphate dehydrogenase
								CG2934	1.26	0.69	0.94	0.03	-1.24	-0.86	-0.86	-0.25	-0.58	0.44	1.07	0.2	CG2934	VhaAC39	VhaAC39	||V-ATPase||CG2934||anon-EST:GressD5||vhaAC39||VhaAC39||	31342	X	3F4	biological process||IEA|GO:0015986|Proteome|11002423//cellular component||IEA|GO:0016469|Proteome|11002423//molecular function||IEA|GO:0046933|Proteome|11002423//molecular function||IEA|GO:0046961|Proteome|11002423//cellular component|hydrogen-transportin
								CG7430	1.02	0.75	0.68	0.19	-1.22	-0.78	-0.93	-0.14	-0.59	0.42	0.62	0.01	CG7430	CG7430	CG7430	||CG7430||	39988	3L	75A6	biological process|glycolysis|IEA|GO:0006096|Proteome|11002423//biological process|electron transport|IEA|GO:0006118|Proteome|11002423//molecular function||IEA|GO:0015036|Proteome|11002423//molecular function|metal ion binding|NAS|GO:0046872|Proteome|1100
								CG7301	0.91	0.64	0.56	0.46	-0.73	-0.66	-0.64	-0.47	-0.49	0.05	0.44	-0.02	CG7301	NA	NA	NA	192347	NA	NA	NA
								CG14760	1.72	1.24	1.21	0.37	-1.4	-1.88	-1.24	-0.41	-1.32	0.3	0.85	-0.28	CG14760	CG14760	CG14760	||CG14760||SP120||	35802	NA	44C2	molecular function|chymotrypsin activity|NAS|GO:0004263|Proteome|11002423//molecular function|serine-type endopeptidase activity|ISS|GO:0004252|Proteome|11002423//molecular function|trypsin activity|IEA|GO:0004295|Proteome|11002423//biological process|pro
								CG3035	1.86	0.82	1.01	0.38	-1.52	-1.19	-1.07	-0.39	-0.77	0.15	0.94	-0.35	CG3035	carmine	cm	||cm||l(1)VEM119||AP-3||CG32731||&mgr;3||mu3||Mu3||cg3035||CG3035||D&mgr;3||	31647	X	60000	cellular component|nucleus|IEA|GO:0005634|Proteome|11002423//biological process|intracellular protein transport|IEA|GO:0006886|Proteome|11002423//biological process|intracellular protein transport|IEA|GO:0006886|Proteome|11002423//biological process|pinoc
								CG10433	1.71	1.2	1.18	0.91	-1.42	-0.62	-1.33	-0.32	-2.25	1.01	1.21	-0.17	CG10433	CG10433	CG10433	||CG10433||	37458	2R	57F3	biological process|defense response|IEA|GO:0006952|Proteome|11002423//
								CG40050	1.2	0.29	0.53	0.16	-0.81	-0.54	-0.53	-0.09	-0.53	0.34	0.93	-0.02	CG40050
								CG11921	2.19	0.92	0.74	0.04	-1	-1.12	-0.85	-0.26	-0.68	0.79	1.02	0.16	CG11921	forkhead domain 96Ca	fd96Ca	||CG11921||fd96Ca||fd4||FD4||Dmfd4||	43010	NA	96B20	biological process|regulation of transcription from Pol II promoter|IEA|GO:0006357|Proteome|11002423//molecular function|transcription factor activity|IEA|GO:0003700|Proteome|11002423//cellular component|nucleus|IEA|GO:0005634|Proteome|11002423//cellular
								CG17246	1.58	0.28	0.7	-0.01	-0.78	-0.85	-0.59	-0.05	-0.69	0.75	0.84	0.22	CG17246	Succinyl coenzyme A synthetase flavoprotein subunit	Scs-fp	||succinate dehydrogenase flavoprotein subunit||scs-fp||Scs-fp||CG17246||	37228	2R	56D3	biological process|electron transport|IEA|GO:0006118|Proteome|11002423//biological process|electron transport|IEA|GO:0006118|Proteome|11002423//biological process|oxidative phosphorylation|ISS|GO:0006119|Proteome|11002423//molecular function||IEA|GO:00150
								CG9503	1.44	-0.05	0.56	0.08	-0.92	-1.11	-1.06	-0.27	-1.14	0.68	0.88	-0.37	CG9503	CG9503	CG9503	||CG9503||	32424	X	13A1	biological process|electron transport|IEA|GO:0006118|Proteome|11002423//molecular function|oxidoreductase activity|IEA|GO:0016491|Proteome|11002423//molecular function|oxidoreductase activity|IEA|GO:0016491|Proteome|11002423//molecular function|oxidoreduc
								CG31794	1.39	0.64	0.08	0.3	-0.82	-1.04	-0.76	-0.3	-1.08	0.7	0.5	-0.4	CG31794	Paxillin	Pax	||PDLP||paxillin||CG31794||paxillin-derived LIM-only protein||Paxillin-derived LIM-only protein||DPxn37||DPaxillin||CG18576||CT40481||Pax||CG18061||CT42454||DPxn||Dpax||	35215	2L	37D5-37D7	molecular function|structural constituent of cytoskeleton|IEA|GO:0005200|Proteome|11002423//biological process|cell motility|IEA|GO:0006928|Proteome|11002423//molecular function|zinc ion binding|IEA|GO:0008270|Proteome|11002423//cellular component|focal a
								CG15211	2.09	0.5	0.87	0.29	-1.14	-1.75	-1.31	-0.26	-1.78	1.05	0.86	-0.79	CG15211	CG15211	CG15211	||CG15211||	32006	X	9E8-9E10	cellular component|membrane|IEA|GO:0016020|Proteome|11002423//
								CG8663	2.86	0.87	1.26	0.35	-1.85	-1.54	-1.38	-0.78	-2.3	1.49	1	-0.72	CG8663	nervana 3	nrv3	||JYbeta1||nrv3||Nrv3||CG8663||Nervana 3||	35408	2L	39D4-39D5	biological process|cation transport|IEA|GO:0006812|Proteome|11002423//biological process|potassium ion transport|IEA|GO:0006813|Proteome|11002423//biological process|sodium ion transport|NAS|GO:0006814|Proteome|11002423//molecular function|potassium-excha
								ca-p60A	1.36	0.39	0.15	0.6	-1.08	-0.83	-0.49	0.01	-0.57	0.41	0.73	-0.27	ca-p60A
								CG3762	2.73	0.65	0.88	0.66	-2.03	-1.36	-1.34	-0.36	-0.94	1.08	0.78	-0.27	CG3762	Vha68-2	Vha68-2	||ATP&agr;||V-ATPase||vha68-2||Vha68-2||vha67-3||CG3762||l(2)s4214||l(2)01510||	45012	2L	34A3	molecular function|ATP binding|IEA|GO:0005524|Proteome|11002423//biological process|purine base metabolism|IEA|GO:0006144|Proteome|11002423//biological process||IEA|GO:0006754|Proteome|11002423//biological process|cation transport|IEA|GO:0006812|Proteome|
								CG8127	2.26	0.62	0.38	0.43	-1.58	-1.67	-1.59	-0.49	-1.66	0.57	0.96	-0.17	CG8127	Ecdysone-induced protein 75B	Eip75B	||E75-C||BcDNA:GM02640||DmE75A||l(3)j3A6||DmE75B||l(3)j5E1||NR1D3||Eip75||l(3)07041||Eip75B||57B||E75||E75A||E75B||l(3)j11A6||E75C||dE75||l(3)neo25||l(3)j12E8||CG8127||EP1121b||anon-WO0172774.31||anon-WO0172774.32||	39999	3L	75B1-75B6	molecular function|DNA binding|ISS|GO:0003677|Proteome|11002423//molecular function|transcription factor activity|IEA|GO:0003700|Proteome|11002423//molecular function|steroid hormone receptor activity|IEA|GO:0003707|Proteome|11002423//molecular function||
								CG8048	1.23	0.67	0.44	0.21	-1.38	-1.15	-0.77	-0.52	-0.78	0.6	0.8	0.03	CG8048	Vacuolar H	Vha44	||V-ATPase||vacuolar ATPase C-subunit||C subunit||V-ATPase C subunit||l(2)6072||CG8048||vha44||Vha44||6072||	36826	2R	53B3-53B4	molecular function|ATP binding|IEA|GO:0005524|Proteome|11002423//biological process||IEA|GO:0015986|Proteome|11002423//cellular component||IEA|GO:0016469|Proteome|11002423//cellular component|hydrogen-transporting ATPase V1 domain|NAS|GO:0000221|Proteome|
								CG17369	1.88	0.99	0.14	0.35	-1.45	-0.99	-0.95	-0.27	-0.88	0.35	0.77	-0.15	CG17369	Vacuolar H	Vha55	||V-ATPase||l(3)87Ca||CG17369||vacuolar ATPase B subunit||vha55||Vha55||VAT-2||l(3)j2E9||B subunit||1208/13||l(3)SzA||SzA||	41550	3R	87C2	molecular function|ATP binding|IEA|GO:0005524|Proteome|11002423//biological process|purine base metabolism|IEA|GO:0006144|Proteome|11002423//biological process||IEA|GO:0006754|Proteome|11002423//biological process|cell motility|IEA|GO:0006928|Proteome|110
								CG32954	1.9	0.75	0.14	0.34	-1.7	-1.18	-1.04	-0.38	-0.98	0.72	0.74	0.22	CG32954	NA	NA	NA	192347	NA	NA	NA
								CG3821	0.85	0.16	0.19	0.5	-0.56	-0.78	-0.66	-0.11	-0.57	0.59	0.71	0.05	CG3821	Aspartyl-tRNA synthetase	Aats-asp	||lethal(2)49Db||l(2)49Db||anon-EST:Liang-2.49||cDNA1||l(2)vr1||CG3821||vr1||AspRS||DRS||Aats-asp||aats-asp||poney||l(2)k04508||l(2)v27||clone 2.49||	36420	2R	49D7	molecular function|mRNA binding|ISS|GO:0003729|Proteome|11002423//molecular function|ATP binding|IEA|GO:0005524|Proteome|11002423//cellular component|cytoplasm|IEA|GO:0005737|Proteome|11002423//biological process|growth|IMP|GO:0040007|Proteome|11002423//m
								CG31554	3.02	1.27	0.93	1.4	-1.28	-2.03	-0.63	-0.46	-1.9	2.06	1.67	-0.11	CG31554	CG31554	CG31554	||CG31554||	318798	NA	83C4	biological process|biological_process unknown|ND|GO:0000004|Proteome|11002423//molecular function|molecular_function unknown|ND|GO:0005554|Proteome|11002423//cellular component|cellular_component unknown|ND|GO:0008372|Proteome|11002423//
								CG32410	0.98	0.57	0.33	0.43	-0.54	-0.98	-0.37	-0.3	-0.91	0.7	0.69	-0.42	CG32410	NA	NA	NA	192347	NA	NA	NA
								CG5703	0.98	0.38	0.36	0.37	-0.44	-0.94	-0.61	-0.17	-0.9	0.73	0.84	-0.12	CG5703	CG5703	CG5703	||CG5703||BEST:LP01573||	32740	X	16B10	molecular function|NADH dehydrogenase activity|ISS|GO:0003954|Proteome|11002423//cellular component|respiratory chain complex I (sensu Eukarya)|ISS|GO:0005747|Proteome|11002423//cellular component|respiratory chain complex I (sensu Eukarya)|ISS|GO:0005747
								CG4229	0.61	0.43	0.3	0.78	-1.14	-0.88	-0.87	0.16	-1.18	0.85	1.11	0.31	CG4229	CG4229	CG4229	NA	39840	3L	73A7	NA
								CG16713	1.57	1.29	0.59	1.23	-2.24	-1.73	-1.53	-0.46	-2.55	1.94	2.04	0.36	CG16713	CG16713	CG16713	||CT37195||CG16713||	33591	2L	24B2-24B3	molecular function|serine-type endopeptidase inhibitor activity|IEA|GO:0004867|Proteome|11002423//
								CG9307	0.9	1.1	0.36	0.8	-0.93	-1.04	-0.85	-0.23	-1.56	1.25	1.09	0	CG9307	CG9307	CG9307	||CG9307||	41687	3R	87F13	cellular component|extracellular|ISS|GO:0005576|Proteome|11002423//biological process|polysaccharide metabolism|IEA|GO:0005976|Proteome|11002423//biological process|chitin metabolism|IEA|GO:0006030|Proteome|11002423//molecular function|chitin binding|IEA|
								CG16858	2.05	1.34	1.23	1.5	-2.43	-2.44	-1.68	-0.66	-1.9	1.24	0.61	-0.16	CG16858	viking	vkg	||DmColA2||collagen IV||&agr;(IV)2/vkg||Type IV collagen||CG16858||collagenIV a2||vkg||l(2)01209||1209||type IV collagen, &agr;-chain||6072||CT25584||	33726	2L	25B10-25C1	molecular function|extracellular matrix structural constituent|IEA|GO:0005201|Proteome|11002423//molecular function|extracellular matrix structural constituent|IEA|GO:0005201|Proteome|11002423//cellular component|cytoplasm|IEA|GO:0005737|Proteome|11002423
								CG13705	1.78	0.97	1.14	0.27	-2.24	-2.45	-1.1	-0.29	-2.18	0.68	1.27	-0.24	CG13705	CG13705	CG13705	NA	38587	3L	64C2	NA
								CG4475	0.63	0.5	0.24	0.26	-1.2	-0.81	-0.76	-0.21	-1.03	0.28	0.72	-0.41	CG4475	Imaginal disc growth factor 2	Idgf2	||IDGF-2||IDGF||idgf2||Idgf2||IDGF2||BG:DS02780.4||CG4475||	34979	2L	36A1	molecular function|chitinase activity|IDA|GO:0004568|Proteome|11002423//cellular component|extracellular|ISS|GO:0005576|Proteome|11002423//biological process|imaginal disc development|IMP|GO:0007444|Proteome|11002423//molecular function|imaginal disc grow
								CG4893	1.3	0.31	0.09	0.31	-2.18	-1.34	-1.05	-0.29	-1.61	1.18	1.03	-0.18	CG4893	NA	NA	||CG4893||	39813	3L	7200	biological process|biological_process unknown|ND|GO:0000004|Proteome|11002423//molecular function|molecular_function unknown|ND|GO:0005554|Proteome|11002423//cellular component|cellular_component unknown|ND|GO:0008372|Proteome|11002423//
								CG7267	1.4	0.51	0.24	0.16	-2	-1.73	-1.28	-0.39	-1.81	1.1	1.11	-0.67	CG7267	CG7267	CG7267	NA	31831	X	8C4-8C6	NA
								CG7920	0.64	0.06	0.14	-0.01	-0.84	-1	-0.66	-0.11	-0.79	0.6	0.65	-0.24	CG7920	CG7920	CG7920	||anon-WO0153538.37||CG7920||i130||GH02390.5prime||BEST:GH02390||anon-WO0153538.36||	43562	3R	99D1	biological process||IEA|GO:0006084|Proteome|11002423//molecular function|4-hydroxybutyrate CoA-transferase activity|ISS|GO:0008411|Proteome|11002423//
								CG9449	1.64	0.84	0.47	0.05	-1.58	-1.31	-1.2	-0.42	-1.67	1.06	1.57	-0.27	CG9449	CG9449	CG9449	||CG9449||	40117	3L	76B5	biological process|phosphate metabolism|IEA|GO:0006796|Proteome|11002423//molecular function|acid phosphatase activity|ISS|GO:0003993|Proteome|11002423//
								CG3612	1.06	0.49	0.59	0.36	-1.69	-0.65	-0.62	-0.22	-0.74	0.55	0.79	-0.11	CG3612	bellwether	blw	||ms(2)Pry58F||mitochondrial ATP synthase alpha subunit||l(2)59ABa||A2(2nd)27||ATP synthetase &agr; chain||l(2)03972||colibri||ms(2)01504||l(2)01410||blw||CG3612||l(2)k00212||ATPsyn-&agr;||	37617	2R	59B2	molecular function|ATP binding|IEA|GO:0005524|Proteome|11002423//biological process|nucleobase, nucleoside, nucleotide and nucleic acid metabolism|IEA|GO:0006139|Proteome|11002423//biological process||IEA|GO:0006754|Proteome|11002423//biological process||
								CG10120	1.53	1.14	0.54	1	-2.02	-1.3	-1.44	-0.38	-1.53	1.1	1.16	-0.18	CG10120	Malic enzyme	Men	||Men||anon-WO0118547.278||Mdh-NADP||MDH||Me||ME||NADP-malic enzyme||malic enzyme||CG10120||	47173	3R	87C6-87C7	molecular function|malate dehydrogenase (oxaloacetate-decarboxylating) (NADP+) activity|NAS|GO:0004473|Proteome|11002423//biological process|tricarboxylic acid cycle|ISS|GO:0006099|Proteome|11002423//biological process|malate metabolism|IEA|GO:0006108|Pro
								CG32633	1.86	0.94	1	0.89	-2.41	-1.27	-1.26	-0.26	-1.86	1.24	1.24	-0.15	CG32633	CG32633	CG32633	NA	326225	X	12A4	NA
								CG18076	0.86	0.89	0.41	0.26	-1.15	-1.23	-0.76	-0.43	-1.07	0.48	0.82	-0.17	CG18076	short stop	shot	||short-stop||kopupu||groovin||kakapoo||l(2)CA4||42/4||kop||l(2)k03010||Grv||grv||CG18076||CG18637||l(2)k04204||shortstop||l(2)k10821||kak||Kakapo||kakapo||l(2)k05434||l(2)k05821||shortstop/kakapo||l(2)k15606||shot||Shot||	36542	2R	50C6-50C12	cellular component|adherens junction|IDA|GO:0005912|Proteome|11002423//cellular component|fusome|NAS|GO:0045169|Proteome|11002423//molecular function|structural constituent of cytoskeleton|IEA|GO:0005200|Proteome|11002423//molecular function|calcium ion b
								CG8846	1.08	1	0.42	0.54	-1.43	-2.14	-1.31	-0.46	-1.72	1.42	1.42	0.02	CG8846	Thor	Thor	||l(2)k07736||insulin-stimulated eIF-4E binding protein||pp20||eIF-4E-binding protein||CG8846||BcDNA:HL08053||Dm 4E-BP||4E-BP1||CT8705||4EBP||eIF4E-BP||d4E-BP1||d4EBP||anon-WO0172774.158||4E-BP||BcDNA.HL08053||l(2)k13517||d4E-BP||thor||Thor||Phas1||?||	33569	2L	23F6	molecular function|eukaryotic initiation factor 4E binding|NAS|GO:0008190|Proteome|11002423//biological process||IEA|GO:0045947|Proteome|11002423//biological process|response to stress|NAS|GO:0006950|Proteome|11002423//biological process|immune response|N
								CG3299	0.99	0.52	0.29	0.59	-1.28	-1.26	-1.13	-0.22	-1.13	0.75	0.87	-0.06	CG3299	Vinculin	Vinc	||vinculin||vinc||Vinc||Dmvincp||CG3299||Vinculin at 2EF||Vin2EF||CT11081||Vin||EG:103B4.1||	31201	X	2E2-2E3	molecular function|structural constituent of cytoskeleton|IEA|GO:0005200|Proteome|11002423//biological process|cell motility|IEA|GO:0006928|Proteome|11002423//biological process|cell adhesion|NAS|GO:0007155|Proteome|11002423//cellular component|actin cyto
								CG8629	1.41	1.07	1.1	0.57	-2.17	-2.23	-1.73	-0.28	-1.74	1.29	1.29	-0.29	CG8629	CG8629	CG8629	||CG8629||BcDNA:RE33457||	38781	3L	650000	molecular function|carrier activity|IEA|GO:0005386|Proteome|11002423//biological process|lipid transport|IEA|GO:0006869|Proteome|11002423//molecular function|acyl-CoA binding|TAS|GO:0000062|Proteome|11002423//molecular function|enzyme inhibitor activity|I
								CG8444	1.58	0.2	1.13	0.5	-1.37	-1.02	-0.85	0.02	-0.97	0.75	0.83	-0.1	CG8444	CG8444	CG8444	NA	41104	3R	85D6-85D7	NA
								CG11768	1.52	0.8	0.91	0.41	-1.3	-0.88	-0.27	-0.51	-0.99	0.57	1.06	0.1	CG11768	CG11768	CG11768	NA	41046	3R	85A10	NA
								CG6020	1.35	0.55	1.07	0.31	-0.94	-0.79	-0.24	-0.28	-0.89	0.72	0.63	0.26	CG6020	CG6020	CG6020	||CG6020||	40272	3L	77C6	molecular function|NADH dehydrogenase activity|ISS|GO:0003954|Proteome|11002423//cellular component|respiratory chain complex I (sensu Eukarya)|ISS|GO:0005747|Proteome|11002423//cellular component|respiratory chain complex I (sensu Eukarya)|ISS|GO:0005747
								CG12665	1.24	0.82	0.86	0.33	-1.08	-0.5	-0.55	-0.45	-0.4	0.66	0.76	0.29	CG12665	Odorant-binding protein 8a	Obp8a	||8a||Obp8a||CG12665||	31860	X	8D9	biological process|transport|IEA|GO:0006810|Proteome|11002423//molecular function|odorant binding|IEA|GO:0005549|Proteome|11002423//
								CG5214	1.76	0.85	0.83	0.37	-1.32	-0.7	-0.77	-0.12	-0.68	0.84	0.49	0.25	CG5214	CG5214	CG5214	||CG5214||	41360	3R	86D9	molecular function|acetyltransferase activity|IEA|GO:0016407|Proteome|11002423//molecular function|dihydrolipoyllysine-residue succinyltransferase activity|ISS|GO:0004149|Proteome|11002423//molecular function|dihydrolipoyllysine-residue succinyltransferas
								CG7118	3.88	2.23	2.14	0.72	-1.8	-0.95	-0.91	-0.22	-2.13	2.64	1.82	0.58	CG7118	Jonah 66Ci	Jon66Ci	||CG7118||SP171||Jon66C||Jonah 66C||Jon66Ci||66C||	38952	3L	66C10	molecular function|chymotrypsin activity|NAS|GO:0004263|Proteome|11002423//molecular function|trypsin activity|IEA|GO:0004295|Proteome|11002423//molecular function|serine-type endopeptidase activity|ISS|GO:0004252|Proteome|11002423//biological process|pro
								CG7610	1.67	0.8	1.19	0.07	-1.05	-0.68	-0.87	-0.05	-0.9	0.7	0.62	0.09	CG7610	NA	NA	NA	192347	NA	NA	NA
								CG18437	1.63	0.94	1.03	0.58	-0.8	-0.68	-0.79	-0.34	-0.56	0.97	0.99	0.3	CG18437	CG18437	CG18437	NA	43324	NA	98A15-98B1	NA
								CG8628	2.16	1.34	1.73	0.49	-1.31	-1.02	-1.11	-0.17	-1.15	1.52	1.16	0.23	CG8628	CG8628	CG8628	||CG8628||	38783	3L	650000	molecular function|carrier activity|IEA|GO:0005386|Proteome|11002423//biological process|lipid transport|IEA|GO:0006869|Proteome|11002423//molecular function|acyl-CoA binding|TAS|GO:0000062|Proteome|11002423//molecular function|enzyme inhibitor activity|I
								CG17896	2.91	2.18	1.59	0.58	-1.75	-1.64	-1.84	-0.04	-1.74	1.11	1.25	0.11	CG17896	CG17896	CG17896	||CG17896||EG:171D11.1||	30995	X	1B5	biological process|amino acid catabolism|IEA|GO:0009063|Proteome|11002423//molecular function|methylmalonate-semialdehyde dehydrogenase (acylating) activity|ISS|GO:0004491|Proteome|11002423//molecular function|methylmalonate-semialdehyde dehydrogenase (ac
								CG3731	1.01	0.66	0.39	0.33	-0.35	-0.58	-0.53	-0.09	-0.73	0.4	0.28	0.22	CG3731	CG3731	CG3731	||CG3731||	41800	NA	88D6	biological process|proteolysis and peptidolysis|NAS|GO:0006508|Proteome|11002423//biological process|proteolysis and peptidolysis|NAS|GO:0006508|Proteome|11002423//molecular function|mitochondrial processing peptidase activity|ISS|GO:0004240|Proteome|1100
								CG4533	2.68	1.63	0.88	1.56	-1.4	-1.82	-1.51	-0.1	-1.82	0.78	1.01	0.11	CG4533	lethal (2) essential for life	l(2)efl	||l(2)13-1||CG4533||lethal (2) essential for life||l(2)59Fa||l(2)efl||l(2)Efl||el(2)13-1||	37744	2R	59F6	biological process|protein folding|IEA|GO:0006457|Proteome|11002423//biological process|response to stress|NAS|GO:0006950|Proteome|11002423//biological process|defense response|IEA|GO:0006952|Proteome|11002423//biological process|response to heat|IEP|GO:0
								CG6058	2.38	1.45	0.66	1.5	-1.66	-0.85	-0.75	-0.25	-0.8	0.84	0.93	0.18	CG6058	Aldolase	Ald	||ald||Ald||ALD||BcDNA:LP07735||aldolase||T12||T4||fructose 1,6 biphosphate-aldolase A||FBA||T6||T7||CG6058||	43183	3R	97A6	molecular function|fructose-bisphosphate aldolase activity|ISS|GO:0004332|Proteome|11002423//biological process|glycolysis|IEA|GO:0006096|Proteome|11002423//molecular function|fructose-bisphosphate aldolase activity|ISS|GO:0004332|Proteome|11002423//molec
								CG13321	3.05	2.35	0.62	1.31	-1.62	-1.85	-1.27	-0.28	-2.22	1.68	1.33	0.33	CG13321	CG13321	CG13321	NA	36430	2R	490000	NA
								CG13830	3.48	1.88	1.17	1.24	-2.38	-1.87	-1.24	-0.93	-2.04	1.59	1.12	-0.15	CG13830	CG13830	CG13830	||CG13830||	42733	3R	94D12-94D13	molecular function|cysteine protease inhibitor activity|NAS|GO:0004869|Proteome|11002423//molecular function|calcium ion binding|IEA|GO:0005509|Proteome|11002423//molecular function|protease inhibitor activity|ISS|GO:0030414|Proteome|11002423//
								CG8610	1.35	0.86	0.84	0.31	-0.94	-0.77	-0.1	-0.04	-0.67	0.82	0.48	0.23	CG8610	Cdc27	Cdc27	||l(3)L7123||CG8610||mks||makos||cdc27||Cdc27||Dmcdc27||CDC27Dm||	38798	3L	65000000000	biological process|cell cycle|IMP|GO:0007049|Proteome|11002423//biological process|mitosis|IMP|GO:0007067|Proteome|11002423//biological process||IMP|GO:0050875|Proteome|11002423//
								CG7049	1.78	1.3	0.83	0.83	-1.14	-0.95	-0.17	-0.14	-0.88	1.18	0.75	0.27	CG7049	NA	NA	NA	38022	3L	61B2	NA
								CG9603	1.59	1.17	0.66	0.76	-1.23	-0.96	-0.54	-0.08	-0.82	0.95	0.66	0.08	CG9603	CG9603	CG9603	||VIIa||CG9603||	50002	3R	84F13	molecular function|electron transporter activity|IEA|GO:0005489|Proteome|11002423//molecular function|cytochrome-c oxidase activity|NAS|GO:0004129|Proteome|11002423//molecular function|cytochrome-c oxidase activity|NAS|GO:0004129|Proteome|11002423//cellul
								CG30383	1.39	0.93	0.9	0.36	-1.24	-1.18	-0.71	-0.04	-0.78	0.77	1.2	0.13	CG30383	CG30383	CG30383	||CG30383||	246583	2R	4.3e+19	biological process|biological_process unknown|ND|GO:0000004|Proteome|11002423//molecular function|molecular_function unknown|ND|GO:0005554|Proteome|11002423//cellular component|cellular_component unknown|ND|GO:0008372|Proteome|11002423//
								CG14377	1.45	1.3	1.44	0.78	-1.49	-1.47	-0.65	0.11	-1.03	1.14	1.27	0.6	CG14377	CG14377	CG14377	NA	41649	NA	87000000000	NA
								CG32013	2.01	1.24	1.29	1.05	-1.83	-1.77	-1.12	-0.02	-1.24	1.21	1.57	0.73	CG32013	CG32013	CG32013	||CG32013||	317821	NA	101F1	biological process|biological_process unknown|ND|GO:0000004|Proteome|11002423//molecular function|molecular_function unknown|ND|GO:0005554|Proteome|11002423//cellular component|cellular_component unknown|ND|GO:0008372|Proteome|11002423//
								CG18444	1.45	0.81	0.89	0.81	-1.13	-1.05	-0.98	-0.3	-0.6	0.64	0.77	0.01	CG18444	NA	NA	NA	192347	NA	NA	NA
								CG10219	1.52	1.24	0.81	0.59	-1.52	-1.03	-0.77	-0.38	-0.55	0.47	0.84	0.14	CG10219	CG10219	CG10219	||CG10219||BEST:GH27735||	42808	3R	95B1	biological process|electron transport|IEA|GO:0006118|Proteome|11002423//cellular component|integral to membrane|NAS|GO:0016021|Proteome|11002423//molecular function|heme binding|IDA|GO:0020037|Proteome|11002423//molecular function|succinate dehydrogenase
								CG8627	1.8	0.98	1.07	0.94	-1.55	-1.7	-1.06	0.13	-0.79	0.78	0.72	-0.28	CG8627	Diazepam-binding inhibitor	Dbi	||endozepine||CG8627||BcDNA:RH39533||diazepam-binding protein||acyl-CoA binding protein||ACBP||anon-WO0172774.131||diazepam binding inhibitor||DBI||Dbi||	38784	3L	650000	molecular function|carrier activity|IEA|GO:0005386|Proteome|11002423//biological process|lipid transport|IEA|GO:0006869|Proteome|11002423//molecular function|acyl-CoA binding|TAS|GO:0000062|Proteome|11002423//molecular function|acyl-CoA binding|TAS|GO:000
								CG18211	3.26	1.66	2.9	0.87	-3.02	-2.9	-1.29	-0.09	-1.7	1.59	1.77	0.52	CG18211	NA	NA	NA	192347	NA	NA	NA
								CG8871	3.55	1.79	2.88	1.34	-3.12	-3.05	-1.42	0.05	-1.29	0.91	1.39	0.41	CG8871	Jonah 25Biii	Jon25Biii	||Jon25B||Jonah 25B||25B||SP177||CG8871||Jon25Biii||	33706	2L	25B4	molecular function|chymotrypsin activity|NAS|GO:0004263|Proteome|11002423//molecular function|trypsin activity|IEA|GO:0004295|Proteome|11002423//molecular function|serine-type peptidase activity|IEA|GO:0008236|Proteome|11002423//biological process|proteol
								CG14453	1.86	1.49	1.56	1.01	-1.75	-1.41	-0.69	-0.26	-1.38	1.14	0.98	0.28	CG14453	CG14453	CG14453	NA	40484	3L	79F6	NA
								CG18554	1.1	1.16	1.17	0.83	-1.43	-0.73	-0.77	-0.24	-1.12	0.71	0.73	0.13	CG18554	CG18554	CG18554	NA	41545	3R	87B15	NA
								CG8611	2.23	1.91	1.86	1.38	-2.05	-1.65	-0.98	0.18	-1.15	0.71	0.75	-0.15	CG8611	CG8611	CG8611	||BcDNA:GH02833||cg8611||CG8611||DmRH11||	32725	X	16A5	molecular function|nucleic acid binding|IEA|GO:0003676|Proteome|11002423//molecular function|nucleic acid binding|IEA|GO:0003676|Proteome|11002423//molecular function|ATP binding|IEA|GO:0005524|Proteome|11002423//biological process|nucleobase, nucleoside,
								CG32453	1.91	1.73	1.35	0.75	-1.93	-1.74	-1.06	-0.18	-1.47	0.87	0.32	-0.21	CG32453	CG32453	CG32453	||CG32453||	318036	3L	79F6	biological process|biological_process unknown|ND|GO:0000004|Proteome|11002423//molecular function|molecular_function unknown|ND|GO:0005554|Proteome|11002423//cellular component|cellular_component unknown|ND|GO:0008372|Proteome|11002423//
								CG12546	2.38	1.55	1.76	0.61	-2.16	-1.29	-0.66	-0.35	-1.41	1.12	0.83	-0.08	CG12546	CG12546	CG12546	NA	40483	NA	79F6	NA
								CG8676	0.94	0.68	0.59	0.47	-0.81	-0.77	-0.5	-0.19	-0.56	0.34	0.55	0.02	CG8676	Hormone receptor-like in 39	Hr39	||i70||DHR30||ftz-f1&bgr;||ftz-F1&bgr;||FTZ-F1&bgr;||&bgr;FTZ-F1||CG8676||Hr39||EP(2)2490||NR5B1||dFTZ-F1&bgr;||FTZ-F1||ftz-F1||DHR39||FTZ-F1B||DHR39/Ftz-F1&bgr;||	35398	2L	39B4-39C1	molecular function|ligand-dependent nuclear receptor activity|NAS|GO:0004879|Proteome|11002423//cellular component|nucleus|IEA|GO:0005634|Proteome|11002423//molecular function|steroid hormone receptor activity|IEA|GO:0003707|Proteome|11002423//biological
								CG31775	2.5	2.03	1.65	1.11	-2.16	-2.53	-1.23	-0.2	-1.3	1.04	1.04	-0.32	CG31775	CG31775	CG31775	||CG31775||BcDNA:LP08165||BG:DS00810.2||BcDNA:RE38252||BcDNA:RH25462||	251399	NA	35B5	biological process|biological_process unknown|ND|GO:0000004|Proteome|11002423//molecular function|molecular_function unknown|ND|GO:0005554|Proteome|11002423//cellular component|cellular_component unknown|ND|GO:0008372|Proteome|11002423//
								CG9470	3.14	2.07	2.08	1.22	-2.84	-2.4	-1.25	-0.5	-1.62	1.35	1.05	-0.16	CG9470	Metallothionein A	MtnA	||MtnA||anon-WO0153538.49||BcDNA:GH18460||DrosMtn||metallothionein N||anon-WO0153538.42||metallothionein||anon-WO0153538.44||CG9470||Mtn||MTN||	41202	3R	85000000000	molecular function|metal ion binding|NAS|GO:0046872|Proteome|11002423//molecular function|metal ion binding|NAS|GO:0046872|Proteome|11002423//
								CG8343	1.99	1.06	1.61	0.64	-1.32	-0.88	-1.08	-0.26	-1.92	1.75	1.59	0.54	CG8343	CG8343	CG8343	||Incilarin-like||GH10831-Inc||GH10831||CG8343||BEST:GH10831||	35544	2R	42A13	molecular function|mannose binding|IDA|GO:0005537|Proteome|11002423//
								CG10827	2.29	0.59	1.47	0.71	-0.99	-1.15	-1.4	-0.24	-1.88	1.76	2.03	0.41	CG10827	CG10827	CG10827	||CG10827||	42482	3R	93B3	biological process|skeletal development|IEA|GO:0001501|Proteome|11002423//biological process|mesoderm development|NAS|GO:0007498|Proteome|11002423//biological process|metabolism|IEA|GO:0008152|Proteome|11002423//molecular function|nucleotide phosphatase a
								CG11654	1.67	0.23	0.84	0.33	-0.96	-0.75	-0.88	-0.21	-1.04	0.66	1.08	0.31	CG11654	Adenosylhomocysteinase at 13	Ahcy13	||Ahcy13||AdoHcyase||CG11654||SAHH||ahcY||S-Adenosyl-L-homocysteine hydrolase||	32471	X	13C3	biological process|purine base metabolism|IEA|GO:0006144|Proteome|11002423//biological process|one-carbon compound metabolism|NAS|GO:0006730|Proteome|11002423//molecular function|adenosylhomocysteinase activity|ISS|GO:0004013|Proteome|11002423//molecular
								CG8327	2.06	0.07	1.1	0.61	-0.75	-0.78	-0.73	-0.02	-1.39	1.13	1.15	0.31	CG8327	Spermidine Synthase	SpdS	||SpdS||CG8327||	41167	3R	85E1-85E2	molecular function|S-adenosylmethionine-dependent methyltransferase activity|IEA|GO:0008757|Proteome|11002423//molecular function|spermidine synthase activity|ISS|GO:0004766|Proteome|11002423//biological process|spermidine biosynthesis|ISS|GO:0008295|Prot
								CG9540	3.35	0.61	1.84	1.08	-1.8	-1.54	-1.38	0.1	-2.39	1.89	2.14	0.3	CG9540	Antigen 5-related 2	Ag5r2	||Ag5r2||CG9540||Agr2||	44079	X	12F4	biological process|defense response|IEA|GO:0006952|Proteome|11002423//cellular component|extracellular|ISS|GO:0005576|Proteome|11002423//
								CG12079	0.76	0.27	0.48	0.16	-0.63	-0.75	-0.16	0	-0.74	0.43	0.65	-0.02	CG12079	CG12079	CG12079	||CG12079||	38378	3L	63B7	molecular function|NADH dehydrogenase activity|ISS|GO:0003954|Proteome|11002423//cellular component|respiratory chain complex I (sensu Eukarya)|ISS|GO:0005747|Proteome|11002423//cellular component|respiratory chain complex I (sensu Eukarya)|ISS|GO:0005747
								CG10939	1.05	0.56	0.26	0.34	-0.65	-0.25	-0.43	-0.05	-0.82	0.51	0.59	-0.06	CG10939	SRY interacting protein 1	Sip1	||CG10939||l(2)06373||Sip1||	44155	2R	54B6-54B7	molecular function|protein binding|IEA|GO:0005515|Proteome|11002423//biological process|ion transport|IEA|GO:0006811|Proteome|11002423//biological process|cell homeostasis|IEA|GO:0019725|Proteome|11002423//molecular function|hydrogen antiporter regulator
								CG10910	2.84	1.58	0.9	0.49	-1.81	-1.21	-1.54	-0.01	-2.86	1.49	1.64	0.65	CG10910	CG10910	CG10910	NA	37052	2R	55B1	NA
								CG6457	3.69	2.03	1.48	0.65	-2.29	-1.81	-1.73	-0.19	-3.21	2.29	1.69	0.48	CG6457	yippee interacting protein 7	yip7	||CG6457||yip7||mac||MAC||SPH116||SP116||machete||Machete||	38680	3	65A3	molecular function|trypsin activity|IEA|GO:0004295|Proteome|11002423//molecular function|serine-type endopeptidase activity|ISS|GO:0004252|Proteome|11002423//molecular function|chymotrypsin activity|NAS|GO:0004263|Proteome|11002423//biological process|pro
								CG18180	4.19	1.49	1.25	0.43	-1.98	-1.29	-1.52	-0.14	-3.13	2.38	2.2	0.46	CG18180	CG18180	CG18180	||SP151||CG18180||	39125	3L	67C3	molecular function|trypsin activity|IEA|GO:0004295|Proteome|11002423//molecular function|chymotrypsin activity|NAS|GO:0004263|Proteome|11002423//biological process|proteolysis and peptidolysis|NAS|GO:0006508|Proteome|11002423//
								CG6403	3.45	1.13	1.11	0.79	-1.4	-1.25	-1.71	-0.06	-2.67	1.68	1.8	0.57	CG6403	CG6403	CG6403	NA	43220	3R	97D1	NA
								CG14302	2.65	0.87	1.26	0.54	-2.32	-1.83	-0.93	-0.36	-3.13	2.01	1.19	0.43	CG14302	CG14302	CG14302	NA	42252	3R	91C5	NA
								CG3446	0.84	0.4	0.76	0.15	-0.83	-0.56	-0.54	-0.27	-0.79	0.51	0.7	0	CG3446	CG3446	CG3446	||CG3446||	31578	X	5F2	molecular function|NADH dehydrogenase activity|ISS|GO:0003954|Proteome|11002423//cellular component|respiratory chain complex I (sensu Eukarya)|ISS|GO:0005747|Proteome|11002423//biological process|mitochondrial electron transport, NADH to ubiquinone|ISS|G
								CG31362	2.84	0.75	2.93	0.42	-3.17	-3.35	-1.6	-0.34	-3.37	1.71	2.11	0.44	CG31362	Jonah 99Ciii	Jon99Ciii	||Jonah 99C Beta||Ser99Db||CG31362||Jon99C&agr;ii||JonC||Jonah 99C Alpha||Jon99C1||Jon99C2||CG15519||99C&agr;||Jon99C&bgr;iii||Jon99C&agr;||Jon99Ciii||Jon99C&bgr;||SP143||Serine protease 2||Jon99B||Jon99C||SER2||Ser2||Serine protease 5||Ser5||	43543	3R	99C7	molecular function|trypsin activity|IEA|GO:0004295|Proteome|11002423//molecular function|serine-type endopeptidase activity|ISS|GO:0004252|Proteome|11002423//molecular function|serine-type endopeptidase activity|ISS|GO:0004252|Proteome|11002423//molecular
								CG15093	2.07	0.26	1.42	0.14	-1.25	-1.84	-1.35	-0.16	-1.89	1.48	1.91	0.36	CG15093	CG15093	CG15093	||CG15093||CT34968||	37166	2R	55F2	molecular function|phosphogluconate dehydrogenase (decarboxylating) activity|TAS|GO:0004616|Proteome|11002423//biological process|pentose-phosphate shunt|NAS|GO:0006098|Proteome|11002423//biological process|pentose-phosphate shunt|NAS|GO:0006098|Proteome|
								CG10512	2.27	0.57	1.38	0.4	-1.48	-1.42	-1.28	-0.53	-2.83	1.43	1.55	-0.43	CG10512	CG10512	CG10512	||CG10512||	40339	3L	78C2	biological process|carbohydrate metabolism|IEA|GO:0005975|Proteome|11002423//biological process|tricarboxylic acid cycle|ISS|GO:0006099|Proteome|11002423//molecular function|oxidoreductase activity|IEA|GO:0016491|Proteome|11002423//molecular function|oxid
								CG13323	3.22	1.15	2.17	0.7	-1.84	-1.98	-1.61	-0.35	-3.65	1.93	2.01	0.14	CG13323	CG13323	CG13323	NA	36433	2R	49F1	NA
								CG7714	2.93	0.69	1.94	0.28	-1.86	-2.2	-1.47	-0.29	-2.99	1.37	1.9	0.12	CG7714	CG7714	CG7714	NA	42250	3R	91C4	NA
								CG12310	4.27	1.99	1.25	0.47	-2.27	-2.52	-1.84	-0.5	-2.69	2.03	2.38	0.72	CG12310	CG12310	CG12310	NA	39634	3L	71B2	NA
								CG30028	3.86	1.91	1.72	0.57	-2.77	-2.59	-1.47	-0.57	-2.86	1.47	2.17	0.73	CG30028	NA	NA	NA	192347	NA	NA	NA
								CG12934	4.06	2.43	1.92	0.46	-2.82	-2.06	-1.69	-0.46	-2.75	2.05	2	0.65	CG12934	CG12934	CG12934	NA	36124	2R	47B3	NA
								CG8869	3.6	2.06	1.54	0.25	-2.56	-2.56	-1.71	-0.44	-2.78	1.88	1.52	0.92	CG8869	Jonah 25Bii	Jon25Bii	||Jon25B||Jonah 25B||CG8869||25B||Jon25Bii||SP112||	33707	2L	25B4	molecular function|trypsin activity|IEA|GO:0004295|Proteome|11002423//molecular function|chymotrypsin activity|NAS|GO:0004263|Proteome|11002423//molecular function|serine-type endopeptidase activity|ISS|GO:0004252|Proteome|11002423//biological process|pro
								CG1165	3.37	0.49	1.85	0.69	-2.29	-2.59	-1.61	-0.32	-2.06	1.89	1.73	0.63	CG1165	Lysozyme S	LysS	||lysS||LysS||BcDNA:LP06719||CG1165||	38130	3L	61F4	cellular component|extracellular|ISS|GO:0005576|Proteome|11002423//biological process||IEA|GO:0016998|Proteome|11002423//molecular function|lysozyme activity|NAS|GO:0003796|Proteome|11002423//molecular function|lysozyme activity|NAS|GO:0003796|Proteome|11
								CG7298	3.52	1.28	1.69	0.86	-3.13	-2.54	-1.55	-0.46	-2.02	2.01	1.65	0.25	CG7298	CG7298	CG7298	||CG7298||anon-EST:ParkEST398||	40210	3L	77A2	cellular component|extracellular|ISS|GO:0005576|Proteome|11002423//biological process|chitin metabolism|IEA|GO:0006030|Proteome|11002423//molecular function|chitin binding|IEA|GO:0008061|Proteome|11002423//molecular function|structural constituent of peri
								CG2140	1.26	0.57	0.57	0.51	-0.77	-0.65	-0.35	-0.13	-0.73	0.64	0.6	-0.16	CG2140	Cyt-b5	Cyt-b5	||CG2140||BcDNA:GH02503||l(2)01857||Cyt-b5||BcDNA:RE66521||1857||CYTB5||	35688	NA	43D3	biological process|steroid metabolism|IEA|GO:0008202|Proteome|11002423//molecular function|oxidoreductase activity|IEA|GO:0016491|Proteome|11002423//molecular function|electron transporter activity|IEA|GO:0005489|Proteome|11002423//cellular component|micr
								CG14322	2.36	0.95	1.8	1.04	-1.92	-1.48	-0.98	-0.47	-1.67	1.53	1.35	0.09	CG14322	CG14322	CG14322	NA	42124	3R	90B8-90C1	NA
								CG32189	3.07	1.37	1.53	0.99	-2.16	-1.42	-1.34	-0.22	-2.08	1.66	1.93	0.14	CG32189	CG32189	CG32189	||CG32189||BcDNA:RE39957||	317902	3L	75A4	biological process|biological_process unknown|ND|GO:0000004|Proteome|11002423//molecular function|molecular_function unknown|ND|GO:0005554|Proteome|11002423//cellular component|cellular_component unknown|ND|GO:0008372|Proteome|11002423//
								CG8774	2.09	0.78	0.95	0.89	-2.08	-1.57	-1.35	-0.46	-1.57	1.48	1.65	0.37	CG8774	CG8774	CG8774	||CG8774||	41635	3R	87E4-87E5	molecular function|nucleic acid binding|IEA|GO:0003676|Proteome|11002423//molecular function|membrane alanyl aminopeptidase activity|IEA|GO:0004179|Proteome|11002423//molecular function|endonuclease activity|IDA|GO:0004519|Proteome|11002423//biological pr
								CG13075	2.2	0.43	1.31	0.74	-2.04	-1.43	-1.68	-0.37	-2.61	1.33	1.99	0.35	CG13075	CG13075	CG13075	NA	39756	3L	72D4	NA
								CG1743	2.11	0.68	1.38	0.9	-2.32	-2.38	-1.3	-0.48	-2.15	1.59	1.46	0.02	CG1743	Glutamine synthetase 2	Gs2	||Glutamate-ammonia ligase||CG1743||gs-c||GsII||gs2||Gs2||GS2||cytoplasmic glutamine synthetase||	32087	X	10B11	molecular function|glutamate-ammonia ligase activity|NAS|GO:0004356|Proteome|11002423//biological process||IEA|GO:0009399|Proteome|11002423//biological process|glutamate catabolism|IMP|GO:0006538|Proteome|11002423//biological process|synaptogenesis|IMP|GO
								CG7715	2.51	0.31	1.19	0.8	-1.99	-2.11	-1.37	-0.18	-2.55	1.53	1.66	0.28	CG7715	CG7715	CG7715	NA	42251	3R	91C4	NA
								CG16712	2.65	2.17	1.85	1.01	-2.17	-2.79	-1.44	-0.11	-2.18	1.87	1.46	-0.05	CG16712	CG16712	CG16712	||CG16712||CT37183||BcDNA:RH38008||BcDNA:RH05411||	33592	2L	24B3	molecular function|serine-type endopeptidase inhibitor activity|IEA|GO:0004867|Proteome|11002423//
								CG1179	3.76	1.74	2.44	0.81	-2.59	-3.45	-1.85	-0.05	-2.56	2.2	1.87	0.46	CG1179	Lysozyme B	LysB	||lysB||LysB||CG1179||	38125	3L	61F3	cellular component|extracellular|ISS|GO:0005576|Proteome|11002423//biological process||IEA|GO:0016998|Proteome|11002423//molecular function|lysozyme activity|NAS|GO:0003796|Proteome|11002423//molecular function|lysozyme activity|NAS|GO:0003796|Proteome|11
								CG18030	3.24	1.83	1.56	0.6	-2.6	-3.03	-1.57	0.22	-2.79	2	1.54	0.44	CG18030	Jonah 99Fi	Jon99Fi	||Jonah 99F||Jon99Fi||SPH181||CG18030||Jon99F||	43622	3R	99F6	molecular function|serine-type endopeptidase activity|ISS|GO:0004252|Proteome|11002423//molecular function|chymotrypsin activity|NAS|GO:0004263|Proteome|11002423//molecular function|trypsin activity|IEA|GO:0004295|Proteome|11002423//biological process|pro
								CG6933	2.53	1.3	2.46	0.77	-2.55	-2.68	-2.24	-0.54	-3.51	1.97	1.79	0.16	CG6933	CG6933	CG6933	||CG6933||	40214	3L	77A2	cellular component|extracellular|ISS|GO:0005576|Proteome|11002423//biological process|chitin metabolism|IEA|GO:0006030|Proteome|11002423//molecular function|chitin binding|IEA|GO:0008061|Proteome|11002423//molecular function|structural constituent of peri
								CG6483	3.08	1.25	1.98	0.51	-2.74	-2.13	-1.43	-0.31	-3.07	2.09	2.16	0.3	CG6483	Jonah 65Aiii	Jon65Aiii	||Jon65A||SP98||Jonah 65A||Jon65Aiii||anon-EST:GressD16||CG6483||anon-WO0140519.59||	38683	3L	65A3	molecular function|chymotrypsin activity|NAS|GO:0004263|Proteome|11002423//molecular function|trypsin activity|IEA|GO:0004295|Proteome|11002423//molecular function|serine-type endopeptidase activity|ISS|GO:0004252|Proteome|11002423//biological process|pro
								CG6467	3.28	2.33	2.25	0.92	-3.15	-1.88	-1.77	-0.44	-2.97	1.85	1.97	0.34	CG6467	Jonah 65Aiv	Jon65Aiv	||CG6467||Jon65Aiv||Jon65A||SP117||Jonah 65A||	38682	3L	65A3	molecular function|trypsin activity|IEA|GO:0004295|Proteome|11002423//molecular function|serine-type endopeptidase activity|ISS|GO:0004252|Proteome|11002423//molecular function|chymotrypsin activity|NAS|GO:0004263|Proteome|11002423//biological process|pro
								CG7203	1.99	1.17	1.32	0.81	-1.81	-1.89	-1.25	-0.16	-1.89	1.11	1.44	0.6	CG7203	CG7203	CG7203	NA	34055	2L	28C2	NA
								CG11131	2.64	1.53	1.59	1.12	-2.09	-1.91	-1.52	-0.36	-2.42	1.54	0.96	0.39	CG11131	CG11131	CG11131	NA	40511	3L	80B2	NA
								CG7017	3.14	2.07	2.2	1.87	-2.82	-2.11	-1.68	-0.32	-3.02	1.67	1.98	0.71	CG7017	CG7017	CG7017	||CG7017||	40213	3L	77A2	cellular component|extracellular|ISS|GO:0005576|Proteome|11002423//biological process|chitin metabolism|IEA|GO:0006030|Proteome|11002423//molecular function|chitin binding|IEA|GO:0008061|Proteome|11002423//molecular function|structural constituent of peri
								CG9691	2.84	1.76	1.61	1.1	-2.75	-1.66	-1.96	-0.18	-3.4	1.71	1.57	-0.34	CG9691	NA	NA	NA	31923	X	9A3	NA
								CG9496	2.85	1.87	1.44	0.7	-2.19	-2.06	-1.52	-0.12	-2.71	1.26	1.3	-0.16	CG9496	Tetraspanin 29Fb	Tsp29Fb	||Dm.Tsp29Fb||Tsp29Fb||anon-EST:ParkEST130||CG9496||	34212	2L	29F4-29F5	molecular function|receptor binding|IEA|GO:0005102|Proteome|11002423//biological process|signal transduction|IEA|GO:0007165|Proteome|11002423//biological process|cell-cell adhesion|IEA|GO:0016337|Proteome|11002423//cellular component|integral to membrane|
								CG31758	1.85	1.44	1.6	1.15	-2.48	-2.09	-1.78	-0.36	-2.88	1.56	1.57	0.07	CG31758	CG31758	CG31758	||CG31758||CG14942||	318928	NA	33A3	molecular function|serine-type endopeptidase inhibitor activity|IEA|GO:0004867|Proteome|11002423//biological process|regulation of proteolysis and peptidolysis|TAS|GO:0030162|Proteome|11002423//
								CG15825	2.51	1.89	1.51	1.24	-2.35	-2.68	-1.57	-0.48	-3.42	1.4	1.58	0.03	CG15825	CG15825	CG15825	NA	35211	2L	37D3	NA
								CG9914	1.8	1.38	1.16	0.47	-2.02	-2	-1.13	0	-2.87	1.28	1.19	0.04	CG9914	CG9914	CG9914	||Enoyl-CoA hydratase mitochondrial||CG9914||	32592	X	14B11	molecular function|structural molecule activity|ISS|GO:0005198|Proteome|11002423//biological process|lipid metabolism|IEA|GO:0006629|Proteome|11002423//biological process|fatty acid metabolism|IEA|GO:0006631|Proteome|11002423//biological process|fatty aci
								CG3604	1.98	1.48	0.8	0.43	-1.56	-1.42	-1.4	-0.06	-2.47	1.17	1.43	0.23	CG3604	CG3604	CG3604	||BcDNA:LP04037||CG3604||	33593	2L	24B3	molecular function|serine-type endopeptidase inhibitor activity|IEA|GO:0004867|Proteome|11002423//
								CG5023	2.29	1.35	1.03	0.57	-1.94	-1.77	-1.51	-0.48	-2.47	1.89	1.45	0.74	CG5023	CG5023	CG5023	||CG5023||	42400	3R	92D2-92D3	molecular function|structural constituent of cytoskeleton|IEA|GO:0005200|Proteome|11002423//biological process|muscle contraction|IEA|GO:0006936|Proteome|11002423//biological process|smooth muscle contraction|IMP|GO:0006939|Proteome|11002423//molecular fu
								CG31795	1.66	0.8	0.9	0.43	-1.14	-1.16	-1.07	-0.32	-2.18	1.35	0.91	0	CG31795	ia2	ia2	||CG4355||CG31795||ia2||anon-WO0153538.69||R-PTPX/1A2||CG11344||	33277	2L	21E3-21E4	molecular function|transmembrane receptor protein tyrosine phosphatase activity|NAS|GO:0005001|Proteome|11002423//cellular component|plasma membrane|ISS|GO:0005886|Proteome|11002423//molecular function|protein tyrosine phosphatase activity|NAS|GO:0004725|
								CG18594	2.55	1.38	1.47	0.66	-2.03	-2.23	-1.61	-0.24	-3.11	1.71	1.56	0.31	CG18594	CG18594	CG18594	||CG18594||T2||BcDNA:LP12095||	42644	3R	94A16	biological process|signal transduction|IEA|GO:0007165|Proteome|11002423//molecular function|kinase regulator activity|IEA|GO:0019207|Proteome|11002423//molecular function|kinase inhibitor activity|IEA|GO:0019210|Proteome|11002423//
								CG14482	1.59	1	0.82	0.48	-1.11	-1.47	-0.88	-0.12	-1.49	1.25	1.02	-0.16	CG14482	CG14482	CG14482	||CG14482||	36991	2R	54C9	cellular component|respiratory chain complex III (sensu Eukarya)|ISS|GO:0005750|Proteome|11002423//biological process|mitochondrial electron transport, ubiquinol to cytochrome c|ISS|GO:0006122|Proteome|11002423//molecular function|ubiquinol-cytochrome-c r
								CG31086	2.78	1.73	1.34	0.65	-2.17	-2.32	-1.86	-0.34	-2.97	2.33	1.82	-0.05	CG31086	CG31086	CG31086	NA	43179	3R	97A4	NA
								CG5872	0.22	0.03	0.26	-0.14	0.34	0.29	0.33	0.07	0.24	0.74	0.51	0.69	CG5872	CG5872	CG5872	NA	40262	NA	77C3	NA
								CG6090	-0.04	-0.34	-0.01	-0.89	0.59	0.66	0.62	0.27	0.35	0.66	0.08	0.78	CG6090	Ribosomal protein L34a	RpL34a	||CG6090||L34||RpL34||RpL34a||	43169	3R	96F10	molecular function|nucleic acid binding|IEA|GO:0003676|Proteome|11002423//biological process|protein biosynthesis|IEA|GO:0006412|Proteome|11002423//biological process|protein biosynthesis|IEA|GO:0006412|Proteome|11002423//molecular function|structural con
								CG31472	0.12	-0.3	-0.1	-0.3	-0.11	0.85	0.16	0.13	0.31	0.18	0.06	0.56	CG31472	CG31472	CG31472	||CG31472||CG2649||	40925	3R	840	biological process|coenzyme metabolism|IEA|GO:0006732|Proteome|11002423//molecular function|pyridoxamine-phosphate oxidase activity|ISS|GO:0004733|Proteome|11002423//biological process|pyridoxine biosynthesis|ISS|GO:0008615|Proteome|11002423//
								CG1709	-0.26	0.02	-0.26	-0.14	0.41	0.63	0.07	0.33	-0.07	0.11	-0.12	0.12	CG1709	Vha100-1	Vha100-1	||V-ATPase||CG1709||BcDNA:LD21248||vha100-1||Vha100-1||	43442	NA	98F12	biological process|cation transport|IEA|GO:0006812|Proteome|11002423//biological process|proton transport|NAS|GO:0015992|Proteome|11002423//cellular component|hydrogen-transporting ATPase V0 domain|ISS|GO:0000220|Proteome|11002423//molecular function|hydr
								CG2604	-0.21	-0.11	-0.02	0.06	0.11	0.64	-0.12	0.19	0.11	-0.04	-0.13	0.25	CG2604	CG2604	CG2604	NA	40623	3R	82F6	NA
								CG1550	-0.21	-0.21	-0.01	-0.51	0.21	-0.11	0.34	0.01	0.1	0.62	0.07	0.13	CG1550	CG1550	CG1550	||CG1550||	35732	NA	4.3e+19	biological process|protein modification|IEA|GO:0006464|Proteome|11002423//molecular function|tubulin-tyrosine ligase activity|IEA|GO:0004835|Proteome|11002423//
								CG2862	-0.32	-0.28	-0.34	-0.18	0.32	-0.13	0.14	0.07	-0.22	0.68	-0.1	-0.02	CG2862	CG2862	CG2862	||CG2862||	33471	2L	23A5	molecular function|nucleotide phosphatase activity|IEA|GO:0019204|Proteome|11002423//molecular function|nucleotidase activity|ISS|GO:0008252|Proteome|11002423//
								CG15783	0.1	0.01	-0.11	0.09	-0.29	0.17	0.21	-0.34	-0.31	1.04	0.26	0.67	CG15783	NA	NA	NA	192347	NA	NA	NA
								CG4362	-0.04	-0.18	0.09	0.02	-0.04	0.17	-0.28	0.1	-0.29	0.99	0.2	0.26	CG4362	CG4362	CG4362	||CG4362||	42410	3R	9200	cellular component||IEA|GO:0019028|Proteome|11002423//
								CG30163	0.15	0.02	-0.1	-0.09	-0.05	-0.06	0.15	0.08	0.06	1.15	0.07	0.45	CG30163	CG30163	CG30163	NA	246492	2R	60D13	NA
								CG6173	-0.07	-0.03	-0.02	0.04	0.05	0.12	0.03	0.21	0.11	0.77	-0.15	0.15	CG6173	kal-1	kal-1	||Dmkal||CT19368||CG6173||Kallmann||kal-1||	42865	NA	9500000	biological process|cell adhesion|NAS|GO:0007155|Proteome|11002423//biological process|transmission of nerve impulse|IEA|GO:0019226|Proteome|11002423//cellular component|extracellular matrix|NAS|GO:0005578|Proteome|11002423//
								CG13135	0.28	-0.25	-0.28	-0.07	-0.58	0.53	-0.12	-0.39	-0.05	0.71	-0.01	0.13	CG13135	CG13135	CG13135	NA	34345	2L	31A2	NA
								CG8615	0.32	0	-0.31	-0.29	-0.1	0.36	0.08	-0.29	-0.09	0.47	-0.15	0.74	CG8615	Ribosomal protein L18	RpL18	||CG8615||RpL18||	38794	3L	65000000000	molecular function|nucleic acid binding|IEA|GO:0003676|Proteome|11002423//molecular function|structural constituent of ribosome|IEA|GO:0003735|Proteome|11002423//cellular component|cytosolic large ribosomal subunit (sensu Eukarya)|NAS|GO:0005842|Proteome|
								CG1938	0.44	0.09	-0.15	0.08	-0.09	0.02	-0.72	0.04	0.81	-0.29	-0.02	-0.08	CG1938	Dlic2	Dlic2	||l(1)G0065||Dlic2||DLIC2||l(1)G0190||CG1938||	32057	X	10A8	molecular function|structural constituent of cytoskeleton|IEA|GO:0005200|Proteome|11002423//biological process|RNA localization|IEA|GO:0006403|Proteome|11002423//biological process|intracellular protein transport|IEA|GO:0006886|Proteome|11002423//biologic
								CG7765	0.62	0.02	0.06	-0.07	-0.3	0	-0.75	-0.04	0.34	-0.24	0.08	0.12	CG7765	Kinesin heavy chain	Khc	||kin||Kin||KIN||CG7765||DmKHC||l(2)W12||DK||KIF5A||Kinesin||kinesin||Dmkin||l(2)k13314||KHC||Khc||khc||kinesin &agr; subunit||DKH||l(2)k13219||kinesin I||kinesin heavy chain I||l(2R)W12||kinesin &agr;-chain||	36810	2R	53A2-53A3	cellular component|kinesin complex|ISS|GO:0005871|Proteome|11002423//molecular function|microtubule binding|ISS|GO:0008017|Proteome|11002423//molecular function|structural constituent of cytoskeleton|IEA|GO:0005200|Proteome|11002423//molecular function|AT
								CG4267	0.36	0.05	-0.35	-0.04	-0.01	0.67	0.1	-0.03	0.26	-0.04	0.33	0.05	CG4267	CG4267	CG4267	||CG4267||	33405	2L	22D5	biological process|lipid metabolism|IEA|GO:0006629|Proteome|11002423//biological process|lipid metabolism|IEA|GO:0006629|Proteome|11002423//molecular function|phospholipase activity|IEA|GO:0004620|Proteome|11002423//
								CG12697	0.49	0.27	0.71	0.6	-0.35	-0.01	0.17	-0.02	-0.03	0.57	0.13	0.06	CG12697	Odorant receptor 13a	Or13a	||DOR38||13F.1||CG12697||13a||Or13a||	32562	NA	14A4	molecular function|odorant binding|IEA|GO:0005549|Proteome|11002423//molecular function|olfactory receptor activity|ISS|GO:0004984|Proteome|11002423//biological process|perception of smell|IMP|GO:0007608|Proteome|11002423//cellular component|integral to m
								CG30080	0.07	1.03	1.48	0.86	-0.36	-0.11	0.86	-0.07	0.01	0.53	0.24	0.05	CG30080	CG30080	CG30080	||BcDNA:RE42467||CG12965||CG30080||BcDNA:RE70859||	246441	2R	52C1	molecular function|transcription factor activity|IEA|GO:0003700|Proteome|11002423//biological process|regulation of transcription, DNA-dependent|ISS|GO:0006355|Proteome|11002423//cellular component|cellular_component unknown|ND|GO:0008372|Proteome|1100242
								CG11674	1.52	-0.23	0.07	0.14	0.61	0.92	0.17	0.25	0.54	-0.34	-1.13	0.62	CG11674	CG11674	CG11674	||CG11674||	32374	X	1200000	molecular function|sugar binding|IEA|GO:0005529|Proteome|11002423//biological process|nuclear mRNA splicing, via spliceosome|NAS|GO:0000398|Proteome|11002423//molecular function|ATP-dependent RNA helicase activity|ISS|GO:0004004|Proteome|11002423//cellula
								CG32443	0.85	-0.17	0.04	0.26	0.43	0.71	0.38	-0.09	0.61	-0.25	-0.56	0.3	CG32443	Polycomb	Pc	||CG7618||CG32443||Pc||PC||DmPc||Pc-G||dPC||	40358	NA	78C6-78C7	molecular function|chromatin binding|IEA|GO:0003682|Proteome|11002423//biological process|chromatin assembly or disassembly|IEA|GO:0006333|Proteome|11002423//biological process|gene silencing|NAS|GO:0016458|Proteome|11002423//biological process|gene silen
								CG10091	0.23	0.27	0.17	0.07	-0.21	0.25	-0.36	0.05	0.57	0.15	0.6	0.95	CG10091	Glutathione S transferase D9	GstD9	||GstD9||DmGSTD9||CG10091||	41502	3R	87B8	molecular function|glutathione transferase activity|NAS|GO:0004364|Proteome|11002423//biological process|defense response|IEA|GO:0006952|Proteome|11002423//biological process|response to toxin|IEA|GO:0009636|Proteome|11002423//molecular function|glutathio
								CG4617	-0.29	0.14	-0.06	0.31	-0.01	0.54	0.11	-0.05	0.94	0.12	0.05	0.72	CG4617	CG4617	CG4617	||CG4617||	31657	X	6F5	molecular function|DNA binding|ISS|GO:0003677|Proteome|11002423//biological process|regulation of transcription, DNA-dependent|ISS|GO:0006355|Proteome|11002423//
								CG2187	0.34	0.26	0.3	0.17	-0.36	0.48	0.13	-0.02	0.68	0.31	0.36	0.8	CG2187	CG2187	CG2187	||D3-100EF||anon-100EF-D3||CG2187||	43743	3R	100D2	biological process|coenzyme metabolism|IEA|GO:0006732|Proteome|11002423//biological process|cation transport|IEA|GO:0006812|Proteome|11002423//biological process|extracellular transport|IEA|GO:0006858|Proteome|11002423//molecular function|cation transport
								CG6806	0.67	0.43	0.08	0.12	-0.43	0.58	0.05	0.24	1.17	-0.41	0.37	2.01	CG6806	Larval serum protein 2	Lsp2	||larval-hemolymph-protein||Lsp2||LSP2||LSP 2||Pt-1||LHP||DmeLSP2||C23||CG6806||Larval serum protein-2||LSP-2||Lsp-2||Protein-1||	45326	NA	68F5	cellular component|larval serum protein complex|IDA|GO:0005616|Proteome|11002423//molecular function|carboxypeptidase A activity|IEA|GO:0004182|Proteome|11002423//molecular function|oxygen transporter activity|IEA|GO:0005344|Proteome|11002423//biological
								CG5748	0.31	-0.34	-0.16	-0.07	-0.16	0.51	0.15	-0.11	0.7	0.03	-0.01	0.96	CG5748	Heat shock factor	Hsf	||hsf||Hsf||HSF||DmHSF||D-HSF||CG5748||dHSF||l(2)03091||Dm-Hsf||	37068	2R	55B7-55B8	molecular function|DNA binding|ISS|GO:0003677|Proteome|11002423//molecular function|specific RNA polymerase II transcription factor activity|ISS|GO:0003704|Proteome|11002423//cellular component|nucleus|IEA|GO:0005634|Proteome|11002423//cellular component|
								CG11035	-0.02	0.03	0.19	0.18	-0.24	0.88	0.24	0.04	0.72	0.11	-0.02	1.21	CG11035	CG11035	CG11035	||anon-WO0118547.426||CG11035||	40953	NA	84000000000	biological process|protein folding|IEA|GO:0006457|Proteome|11002423//molecular function|unfolded protein binding|IEA|GO:0051082|Proteome|11002423//biological process|response to heat|IEP|GO:0009408|Proteome|11002423//molecular function|chaperone binding|I
								CR31379	0.23	0.05	0.05	0.08	-0.45	1.4	0.11	-0.11	1.51	0.13	0.08	2.46	CR31379
								CG4205	0.32	0.24	-0.07	0.73	0.34	0.38	-0.17	0.31	0.47	0.1	0.31	1.4	CG4205	Ferredoxin	Fdxh	||Fdxh||BcDNA:RH67819||CG4205||	39070	3L	67B1	biological process|ferredoxin metabolism|IEA|GO:0006124|Proteome|11002423//molecular function|oxidoreductase activity|IEA|GO:0016491|Proteome|11002423//molecular function|electron carrier activity|ISS|GO:0009055|Proteome|11002423//molecular function|elect
								GAL4 (S. cerevisiae)	0.71	0.04	0.28	0.27	1.4	1.15	0.13	0.01	1.15	0	0.01	2.94	GAL4 (S. cerevisiae)
								Gal4_cds_1	0.04	0.13	0.01	0.04	1.08	0.32	-0.17	-0.08	1.57	0.15	-0.12	3.18	Gal4_cds_1
								CG14489	0.32	0.06	0.25	0.02	0.17	0.26	-0.79	0.04	0.8	-0.19	0.06	0.89	CG14489	olf186-M	olf186-M	NA	37039	NA	54F1	NA
								CG5295	0.23	0.15	0.44	0.15	0.07	0.77	-0.57	-0.19	0.53	0.34	0.13	0.66	CG5295	CG5295	CG5295	NA	39611	3L	70F5	NA
								CG17270	0.25	0.74	-0.09	0.16	0.18	0.73	0.08	0.01	0.55	0.03	-0.25	0.42	CG17270	CG17270	CG17270	NA	42462	3R	93A1	NA
								CG32798	0.69	0.18	0.05	0.26	0.29	0.24	0.24	0.08	-0.03	0.31	0.22	0.48	CG32798	CG32798	CG32798	||CG32798||	318216	NA	2F4	biological process|biological_process unknown|ND|GO:0000004|Proteome|11002423//molecular function|molecular_function unknown|ND|GO:0005554|Proteome|11002423//cellular component|cellular_component unknown|ND|GO:0008372|Proteome|11002423//
								CG30295	0.69	0.23	0.51	0.11	-0.06	0.41	0.18	-0.02	0.18	0.28	0.06	0.37	CG30295	Ipk1	Ipk1	||CG15228||Ipk1||CG30295||CG15230||CG15229||dmIpk1||	37360	2R	57B3	molecular function||IMP|GO:0035299|Proteome|11002423//biological process||IDA|GO:0046853|Proteome|11002423//
								CG7033	0.78	0.54	0.07	0.11	0.49	0.51	-0.43	0.14	0.63	-0.29	-0.15	0.4	CG7033	CG7033	CG7033	||SD02216p||CG7033||	31838	X	8C8	molecular function|nucleic acid binding|IEA|GO:0003676|Proteome|11002423//molecular function|ATP binding|IEA|GO:0005524|Proteome|11002423//biological process|protein folding|IEA|GO:0006457|Proteome|11002423//molecular function|ATP-dependent helicase activ
								CG6191	0.84	0.15	0.24	-0.03	-0.3	0.58	-0.41	-0.12	0.18	0.74	0.54	1.11	CG6191	CG6191	CG6191	NA	36513	2R	50B3-50B4	NA
								CG5832	2.12	1.25	-0.28	1.14	0.16	1.02	0.08	-0.1	0.85	0.37	0.13	1.78	CG5832	H6-like-homeobox	Hmx	||CG5832||Hmx||	49799	NA	90B5	biological process|regulation of transcription from Pol II promoter|IEA|GO:0006357|Proteome|11002423//biological process|mesoderm development|NAS|GO:0007498|Proteome|11002423//molecular function|transcription factor activity|IEA|GO:0003700|Proteome|110024
								CG6603	0.92	0.57	0.08	0.78	-0.17	0.24	-0.15	-0.16	0.21	0.23	0.07	0.84	CG6603	Hsc70Cb	Hsc70Cb	||1348/02||1342/17||l(3)134217||Hsc70||HSC70||1485/13||l(3)148513||l(3)00082||hsc70Cb||Hsc70Cb||anon-WO0118547.302||l(3)07621||HSC-70||LD32772||l(3)S134802||l(3)S134217||0041/12||l(3)S148513||CG6603||l(3)70Ca||l(3)70Cb||BEST:LD32772||0318/20||	39557	3L	70C15	molecular function|ATP binding|IEA|GO:0005524|Proteome|11002423//biological process|response to stress|NAS|GO:0006950|Proteome|11002423//biological process|defense response|IEA|GO:0006952|Proteome|11002423//biological process|protein folding|IEA|GO:000645
								CG31448	1.18	1.59	0.48	1.03	0.06	0.8	-0.27	-0.02	0.54	0.12	-0.18	0.87	CG31448	CG31448	CG31448	||CG31448||	318742	3R	89B19	biological process|biological_process unknown|ND|GO:0000004|Proteome|11002423//molecular function|molecular_function unknown|ND|GO:0005554|Proteome|11002423//cellular component|cellular_component unknown|ND|GO:0008372|Proteome|11002423//
								CG6770	3.25	3.64	1.6	2.06	0.01	0.53	-0.69	-0.21	1.2	0.35	0.28	2.16	CG6770	CG6770	CG6770	NA	34621	2L	33B13	NA
								CR31400	1.98	2.29	0.93	1.71	-0.54	0	-0.29	-0.14	0.64	0.06	0.22	1.32	CR31400
								CG30274	2.6	2.02	0.39	1.48	0.36	0.93	-0.29	0.06	0.83	0.2	0.3	1.13	CG30274	CG30274	CG30274	NA	246521	NA	59B2	NA
								CG32130	4.53	3.71	1.68	2.57	0.16	1.84	-1.26	-0.19	1.24	0.88	1.15	3.75	CG32130	CG32130	CG32130	||CG14108||GH04349||CG32130||CG10745||	39518	3L	70B2	molecular function|chymotrypsin activity|NAS|GO:0004263|Proteome|11002423//molecular function|trypsin activity|IEA|GO:0004295|Proteome|11002423//molecular function|protein binding|IEA|GO:0005515|Proteome|11002423//biological process|proteolysis and peptid
								CG4190	4.22	0.99	0.92	2.07	-0.34	0.97	-0.8	0.2	0.4	1.52	0.95	2.41	CG4190	Heat shock gene 67Bc	Hsp67Bc	||Hsp-G3||gene3||gene 3||Gene 3||gene5||Hspg3||CG4190||hsp67B||Hsp67Bc||gene-3||	39071	3L	67B1	biological process|protein folding|IEA|GO:0006457|Proteome|11002423//biological process|response to stress|NAS|GO:0006950|Proteome|11002423//biological process|defense response|IEA|GO:0006952|Proteome|11002423//biological process|response to heat|IEP|GO:0
								CG4535	0.82	0.31	0.31	0.13	-0.09	0.35	-0.11	0.13	0.35	0.24	0.22	0.86	CG4535	FK506-binding protein FKBP59	FKBP59	||FKBP59-bp1||FKBP59||CG4535||l(2)k09010||l(2)k00424||dFKBP59||anon-WO0118547.161||	47762	2L	300	biological process|calcium ion transport|ISS|GO:0006816|Proteome|11002423//biological process|protein folding|IEA|GO:0006457|Proteome|11002423//biological process|protein folding|IEA|GO:0006457|Proteome|11002423//molecular function|protein binding|IEA|GO:
								CG12795	0.67	0.37	0.64	0.68	0.13	0.75	0.04	0.01	1.04	-0.54	0.05	1.24	CG12795	CG12795	CG12795	NA	33561	2L	23F3	NA
								CG31092	0.61	0.06	-0.12	-0.13	0.07	0.49	-0.2	-0.01	0.41	-0.06	-0.09	0.6	CG31092	LpR2	LpR2	||LpR2||LDLR-like||CG31092||CG4823||a2M-receptor-like||CG4834||	43105	3R	96E10-96F1	molecular function|calcium ion binding|IEA|GO:0005509|Proteome|11002423//biological process|intracellular protein transport|IEA|GO:0006886|Proteome|11002423//biological process|receptor mediated endocytosis|IEA|GO:0006898|Proteome|11002423//biological pro
								CG1553	1.16	0.62	0.81	0.48	0.61	0.77	0.14	-0.04	0.4	0.56	-0.06	1.35	CG1553	CG1553	CG1553	NA	35730	2R	43E17-43E18	NA
								CG11750	1.25	1.23	1.17	0.95	1.08	0.73	0	-0.11	1.52	-0.23	-0.17	1.09	CG11750	CG11750	CG11750	NA	32079	X	10B5	NA
								CG1242	3.62	2.78	2.3	2.4	1.69	1.86	-0.72	0.24	1.89	-0.2	0.17	2.39	CG1242	Heat shock protein 83	Hsp83	||83K HSP||l(3)j5C2||Enhancer of sevenless 3A||Su(Raf)3A||en(lz)3C/4C||DMHSP82||scratch||ms(3)08445||stc||Enhancer of seven in absentia 2||83||anon-WO0140519.209||anon-WO0068693||CG1242||E(sina)2||hsp90||Hsp90||HSP90||HSP82||Hsp82||hsp82||HSP83||Hsp83||hs	38389	3L	63B11	cellular component|centrosome|TAS|GO:0005813|Proteome|11002423//molecular function|ATP binding|IEA|GO:0005524|Proteome|11002423//biological process|protein complex assembly|IEA|GO:0006461|Proteome|11002423//biological process|defense response|IEA|GO:00069
								CG32512	3.65	3.47	2.39	3.33	2.03	3.48	-0.2	0.26	4.06	-0.33	-0.2	3.55	CG32512	CG32512	CG32512	NA	33085	X	190000000	NA
								CG5954	1.92	1.65	0.9	1.89	0.73	1.59	0.27	0.15	1.29	-0.42	-0.45	1.51	CG5954	lethal (3) malignant brain tumor	l(3)mbt	||L(3)MBT/LIN-61||CG5954||tumor-supressor||mbt||MBT||l(3)mbt||l(3)malignant braintumor||	43288	3R	97F1	cellular component||IDA|GO:0031523|Proteome|11002423//molecular function|chromatin binding|IEA|GO:0003682|Proteome|11002423//biological process|regulation of transcription|ISS|GO:0045449|Proteome|11002423//biological process|negative regulation of transcr
								CG5436	4.34	4.75	3.42	3.93	1.57	3.4	-0.96	0.23	5.41	1.8	1.51	5.05	CG5436	Heat shock protein 68	Hsp68	||hsp68||Hsp68||HSP68||CG5436||Hsp-68||68||	42852	NA	95D11	molecular function|ATP binding|IEA|GO:0005524|Proteome|11002423//biological process|protein folding|IEA|GO:0006457|Proteome|11002423//biological process|protein complex assembly|IEA|GO:0006461|Proteome|11002423//biological process|defense response|IEA|GO:
								CG10578	2.45	2.13	1.7	2.38	0.38	2.11	-0.25	-0.04	2.42	0.33	0.46	3.47	CG10578	DnaJ-like-1	DnaJ-1	||droj1||DroJ1||DROJ1||EU3500||DnaJ1 64EF||HSP40/HDJ1||dHDJ1/HSP40||dHDJ1||dHdj1||anon-WO0140519.166||DNAJ1||HSP40||CG10578||anon-WO0172774.135||dnaJ like1||dhdj-1||DnaJ-1||Hsp-40||	38643	3L	6400000	biological process|protein folding|IEA|GO:0006457|Proteome|11002423//biological process|protein folding|IEA|GO:0006457|Proteome|11002423//biological process|response to stress|NAS|GO:0006950|Proteome|11002423//biological process|defense response|IEA|GO:00
								DroJ1	3.19	1.67	1.36	2.48	0.97	1.9	-0.14	0.09	2.22	0.15	0.44	3.34	DroJ1
								CG31449	3.84	5.21	1.05	3.96	2.97	3.81	-0.4	0.14	3.22	2.5	1.62	3.93	CG31449	Heat-shock-protein-70Ba	Hsp70Ba	||heat shock 70||hsp70||Hsp70||HSP70||Hsp 70||hsp70B||Hsp70B||hsp70 87C||hsp70Ba||Hsp70Ba||Hsp70(87C)||dhsp70||Protein 70||87C locus||CG31449||hsp-70||	44921	3R	87B12	molecular function|ATP binding|IEA|GO:0005524|Proteome|11002423//biological process|protein folding|IEA|GO:0006457|Proteome|11002423//biological process|protein complex assembly|IEA|GO:0006461|Proteome|11002423//biological process|defense response|IEA|GO:
								hsp70Ab	3.71	5.07	2.24	4.13	2.77	3.38	-0.51	0.03	3.35	1.33	1.34	3.41	hsp70Ab
								CG32041	2.95	2.36	1.53	1.58	1.95	1.83	-0.62	0.16	2.21	0.65	0.42	2.84	CG32041	NA	NA	NA	192347	NA	NA	NA
								CG5834	4.44	3.17	3.18	4.19	3.55	4.3	-0.32	-0.04	4.3	1.89	2.09	5.08	CG5834	Hsp70Bbb	Hsp70Bbb	||hsp70Bb-prime||hsp70||Hsp70||HSP70||hsp70B||Hsp70Bb||Hsp70Bbb||CG31354||CG5834||	50022	3R	87B14	molecular function|ATP binding|IEA|GO:0005524|Proteome|11002423//biological process|response to heat|IEP|GO:0009408|Proteome|11002423//cellular component|cellular_component unknown|ND|GO:0008372|Proteome|11002423//
								CG18743	4.86	4.92	3.67	4.45	3.59	4.49	-0.33	0.02	3.47	1.55	2.09	4.54	CG18743	Heat-shock-protein-70Ab	Hsp70Ab	||heat shock 70||hsp70 87A||hs70||DMHSP7A2||Protein 70||CG18743||Hsp 70||hsp 70||HSP70||Hsp70||hsp70||hsp70(87A)||Hsp70A||hsp70A||hsp70Ab||Hsp70Ab||87A locus||dhsp70||GRP78||hsp-70||	44920	NA	87A3	molecular function|ATP binding|IEA|GO:0005524|Proteome|11002423//biological process|protein folding|IEA|GO:0006457|Proteome|11002423//biological process|protein complex assembly|IEA|GO:0006461|Proteome|11002423//biological process|defense response|IEA|GO:
								CG4463	5.07	4.41	4.31	4.08	3.85	4.3	-0.16	0.39	3.62	0.71	1.2	4.68	CG4463	Heat shock protein 23	Hsp23	||hsp23||Hsp23||hsp 23||DmHsp23||hsp23/22||23||Protein 23||HSP23/IAP||hsp 22K||CG4463||hsp 23K||	39077	3L	67B2	biological process|protein folding|IEA|GO:0006457|Proteome|11002423//biological process|defense response|IEA|GO:0006952|Proteome|11002423//molecular function|actin binding|NAS|GO:0003779|Proteome|11002423//biological process|response to heat|IEP|GO:000940
								CG4183	4.71	4.16	2.04	3.85	3.73	3.63	-0.4	0.32	3.09	0.36	-0.27	4.27	CG4183	Heat shock protein 26	Hsp26	||hsp26||Hsp26||HSP26||hsp 26||26K||DmHsp26||26||Protein 26||CG4183||heat shock protein hsp26||	39075	3L	67B1-67B2	biological process|protein folding|IEA|GO:0006457|Proteome|11002423//biological process|defense response|IEA|GO:0006952|Proteome|11002423//biological process|determination of adult life span|IMP|GO:0008340|Proteome|11002423//biological process|response to
								CR32865	4.78	3.98	2.38	3.15	4.65	4.85	0.18	-0.35	4.89	0.63	0.48	5.55	CR32865
								CG3428	0.21	0	0.07	0.36	0.5	0.74	0.42	-0.03	0.66	-0.21	-0.51	0.58	CG3428	CG3428	CG3428	NA	39104	3L	67B9	NA
								CG2670	0.28	0.29	0.27	0.15	0.66	0.65	0.15	0.05	1.04	-0.02	-0.58	1.11	CG2670	TBP-associated factor 7	Taf7	||TFIID||TAF<down>II</down>||CG2670||Taf7||TAF7||TAF<down>II</down>55||TBP-associated factor 55kD||TAF||Taf55||TAF55||E||anon-84Ec||dTAF<down>II</down>55||	40934	3R	8400000	biological process|regulation of transcription from Pol II promoter|IEA|GO:0006357|Proteome|11002423//cellular component|transcription factor TFIID complex|ISS|GO:0005669|Proteome|11002423//cellular component|transcription factor TFIID complex|ISS|GO:0005
								CG3226	0.28	0.02	0.2	0.19	0.47	0.76	0.4	-0.05	0.7	0.17	-0.64	0.98	CG3226	CG3226	CG3226	NA	31597	X	6C3	NA
								CG4476	0.6	0.91	0.21	1.09	1.8	1.91	0.02	0.1	1.77	-0.47	-0.28	2.2	CG4476	CG4476	CG4476	||anon-WO0149848.7||CG4476||	39056	3L	67A3	molecular function|sodium symporter activity|IEA|GO:0005328|Proteome|11002423//cellular component|integral to plasma membrane|NAS|GO:0005887|Proteome|11002423//biological process|amino acid metabolism|IEA|GO:0006520|Proteome|11002423//biological process|c
								CG7130	0.6	0.27	0.27	0.9	0.71	1.57	0.26	0.12	1.9	0.28	-0.08	1.62	CG7130	CG7130	CG7130	||CG7130||	40450	3L	79B2	biological process|protein folding|IEA|GO:0006457|Proteome|11002423//biological process|protein folding|IEA|GO:0006457|Proteome|11002423//biological process|response to stress|NAS|GO:0006950|Proteome|11002423//biological process|defense response|IEA|GO:00
								CG6072	0.4	-0.16	0.2	0.04	0.19	0.79	-0.08	-0.26	0.61	-0.07	0.04	0.93	CG6072	sarah	sra	||anon-WO0118547.92||89B||89B11||sra||sara||nebula||CG6072||anon-WO0172774.10||nla||	47384	3R	89B7	molecular function|receptor binding|IEA|GO:0005102|Proteome|11002423//biological process|calcium-mediated signaling|TAS|GO:0019722|Proteome|11002423//biological process|long-term memory|TAS|GO:0007616|Proteome|11002423//biological process|olfactory learni
								CG4466	3.29	0.63	1.58	1.61	2.45	2.66	-0.11	0.34	2.2	0.1	-0.63	4.02	CG4466	Heat shock protein 27	Hsp27	||anon-WO0140519.69||hsp-27||hsp26||hsp27||Hsp27||HSP27||hsp 27||27K||hsp28||Hsp28||HSP28||DmHsp27||Dhsp27||Protein 27||28||hsp27/26||CG4466||heat shock protein hsp27||	39078	3L	67B2	biological process|protein folding|IEA|GO:0006457|Proteome|11002423//biological process|defense response|IEA|GO:0006952|Proteome|11002423//biological process|determination of adult life span|IMP|GO:0008340|Proteome|11002423//biological process|response to
								Rp49	1.75	0.06	0.42	0.56	0.58	1.8	0.03	-0.08	1.4	0.05	0.06	1.58	Rp49
								CG5290	0.8	0.89	1.15	1.36	0.41	0.28	0.29	-0.13	0.16	0.01	0	1.47	CG5290	CG5290	CG5290	NA	39998	3L	75A9	NA
								CG11624	1.36	0.43	1.07	0.95	0.33	0.33	-0.19	-0.29	0.71	-0.28	-0.19	1.5	CG11624	Ubiquitin-63E	Ubi-p63E	||Ubip||Ubp||Ub||CG11624||DmUb||ubiquitin||Ubiquitin||Ubi-p63E||Ubi-p||polyubiquitin||Ubi63E||ubi63E||	38456	3L	63F5	biological process|response to heat|IEP|GO:0009408|Proteome|11002423//biological process||IMP|GO:0050875|Proteome|11002423//molecular function|protein binding|IEA|GO:0005515|Proteome|11002423//biological process|protein modification|IEA|GO:0006464|Proteom
								CG2720	0.95	0.18	0.56	0.57	0.21	0.28	-0.28	-0.1	0.22	0.07	-0.01	0.61	CG2720	Hsp70/Hsp90 organizing protein homolog	Hop	||Sti1||dmSTI1||Hsp70/Hsp90 organizing protein homolog||EP(2)0418||dSTI1||CG2720||l(2)k00616||Hop||dHop||dhop||	33202	2L	21B8	biological process|protein folding|IEA|GO:0006457|Proteome|11002423//biological process|protein complex assembly|IEA|GO:0006461|Proteome|11002423//biological process|response to stress|NAS|GO:0006950|Proteome|11002423//biological process|defense response|
